# Supplementary material for: Synthesis and biological characterization of a 17β hydroxysteroid dehydrogenase type 10 (17β-HSD10) inhibitor
Source: Royal Society of Chemistry journal article supplement (doi:10.1039/d4md00733f), 2024-11-18
Supplement: d4md00733f1.pdf [file d4md00733f1.pdf]

## Supplementary Information

### Synthesis and Biological Characterization of a 17 $\beta$ Hydroxysteroid Dehydrogenase Type 10 (17 $\beta$ -HSD10) Inhibitor

Louise F. Dow,<sup>1</sup> Rasangi Pathirage,<sup>1</sup> Helen E. Erickson,<sup>1</sup> Edrees Amani,<sup>1</sup> Donald R. Ronning,<sup>1,2,3</sup> and Paul C. Trippier<sup>1,2,3,\*</sup>

<sup>1</sup>Department of Pharmaceutical Sciences, College of Pharmacy, University of Nebraska Medical Center, Omaha, Nebraska 68106, United States

<sup>2</sup>Fred & Pamela Buffett Cancer Center, University of Nebraska Medical Center, Omaha, Nebraska 68106, United States

<sup>3</sup>UNMC Center for Drug Design and Innovation, University of Nebraska Medical Center, Omaha, Nebraska 68106, United States

\*Corresponding Author; [paul.trippier@unmc.edu](mailto:paul.trippier@unmc.edu)

## Table of Contents

|                                                                                                           |    |
|-----------------------------------------------------------------------------------------------------------|----|
| Figure S1A                                                                                                | 3  |
| Figure S1B                                                                                                | 4  |
| Figure S2                                                                                                 | 5  |
| Table S1                                                                                                  | 8  |
| Figure S3                                                                                                 | 9  |
| Chemistry                                                                                                 | 10 |
| <sup>1</sup> H, <sup>13</sup> C NMR spectra and HPLC and HRMS traces of intermediates and final compounds | 18 |
| Normalized MTS Assay Biological data                                                                      | 89 |

**Figure S1A.** Melt curve and derivative plot of 17 $\beta$ -HSD10 treated with either DMSO, Frentizole (Top) or **1** (Bottom) at 5, 10, 25, 50 and 100  $\mu$ M. Conditions: 20 mM Bis-tris pH 6.5, 150 mM NaCl, 0.3 mM TCEP, 10  $\mu$ M ABAD, 1x dye

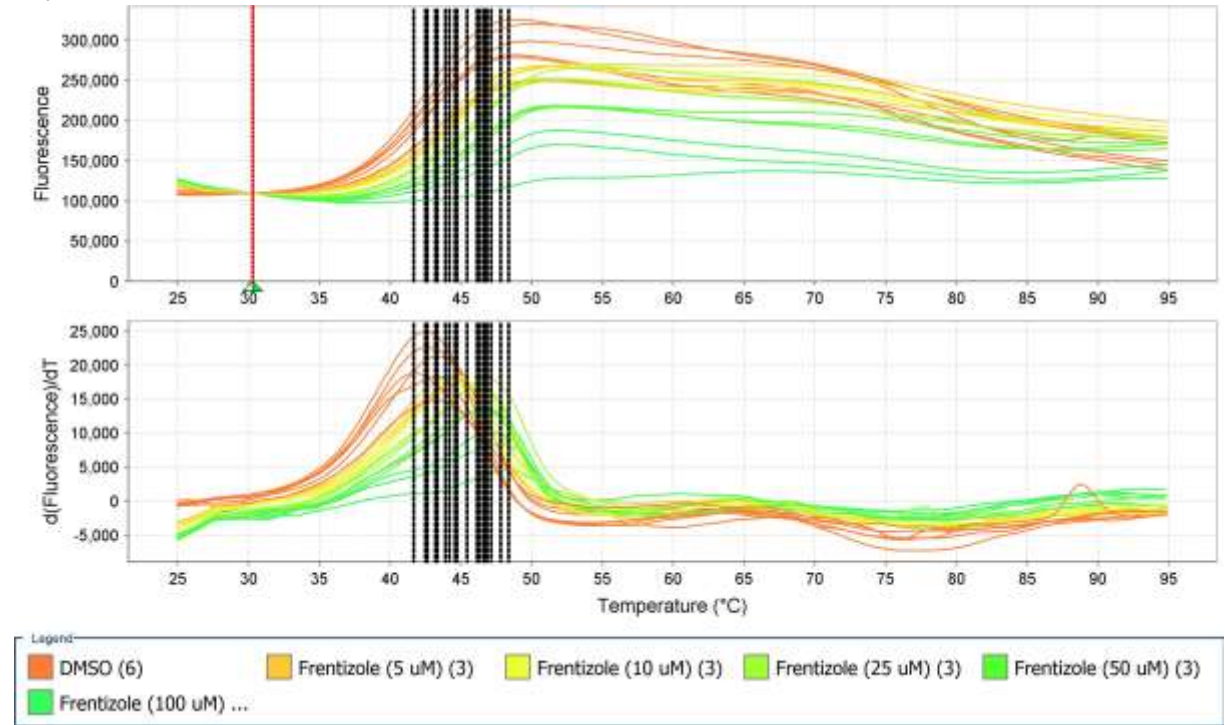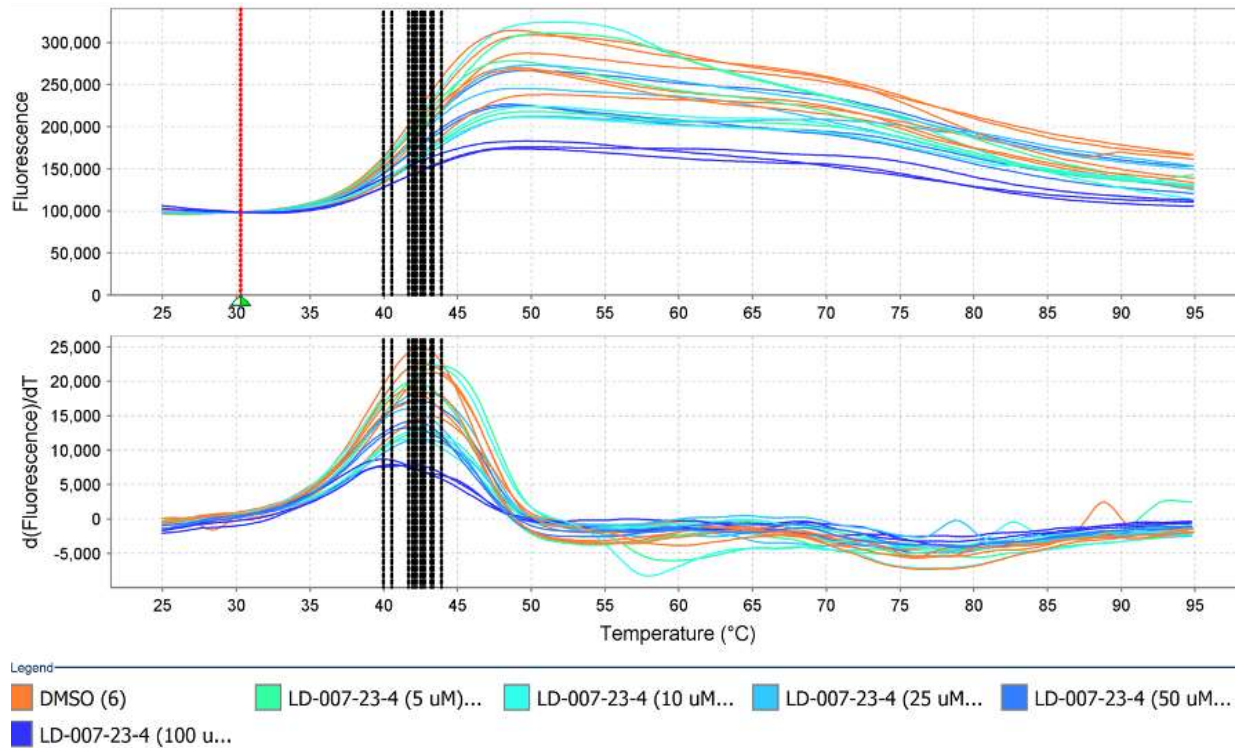

**Figure S1B.** Melt curve and derivative plot of 17 $\beta$ -HSD10 treated with either DMSO, **1** or Frentizole at 100  $\mu$ M. Conditions: 20 mM Bis-tris pH 6.5, 150 mM NaCl, 0.3 mM TCEP, 10  $\mu$ M ABAD, 1x dye.

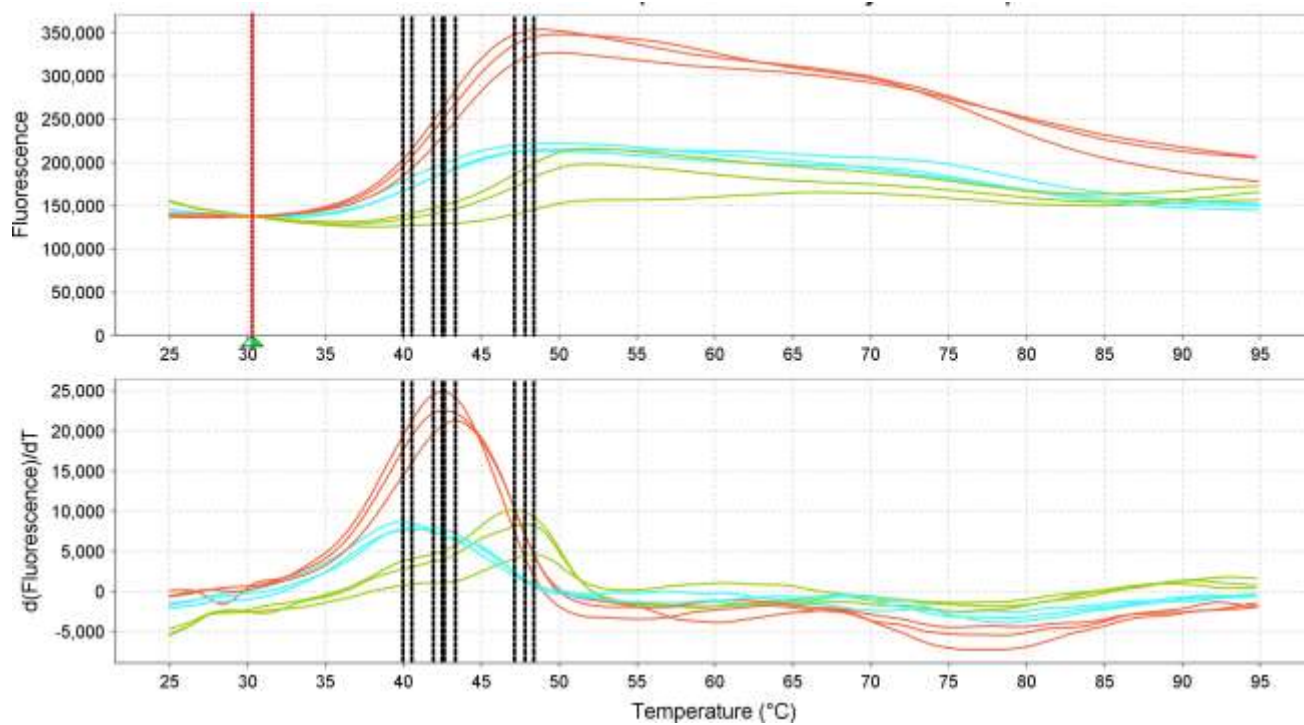

■ DMSO

■ **1** (100  $\mu$ M)

■ Frentizole (100  $\mu$ M)

**Figure S2.** Cell Viability assay measuring the toxicity of **1** at 0.1-100  $\mu\text{M}$  in malignant and non-malignant cell lines.

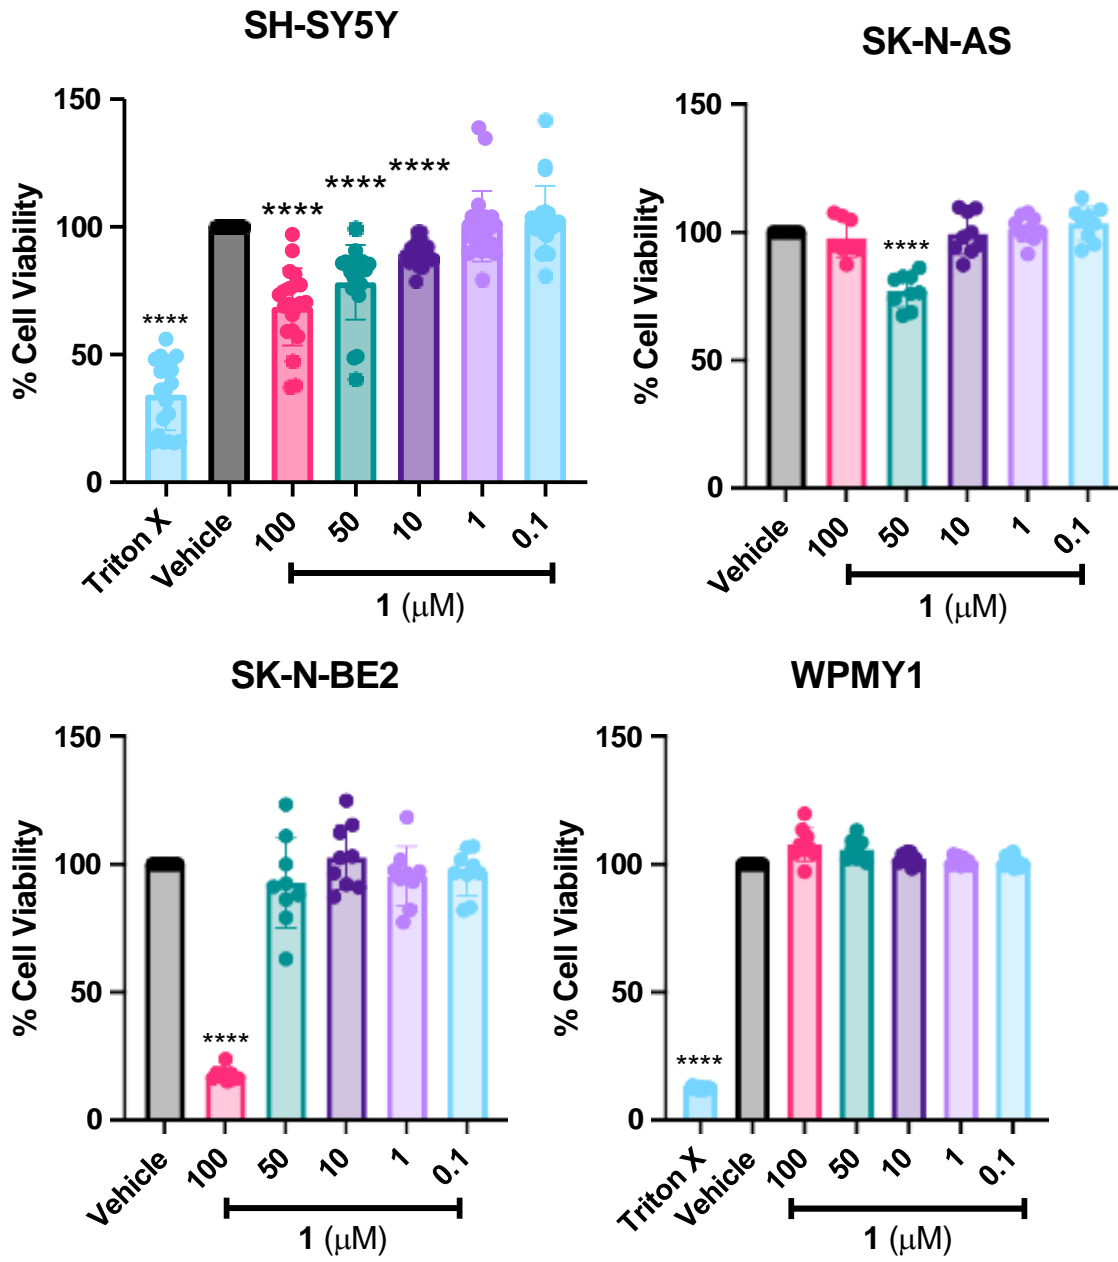

**PANC-1**

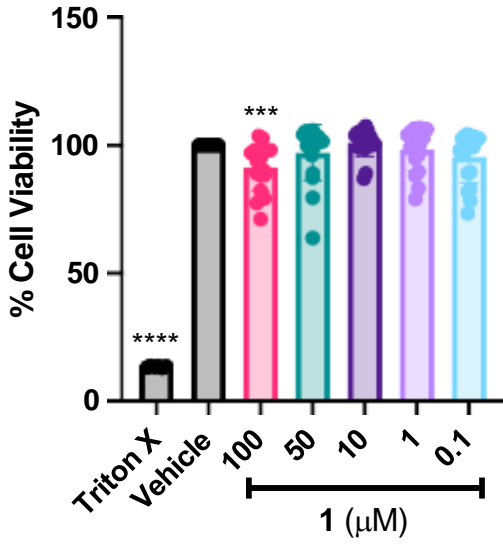

**PnT2C2**

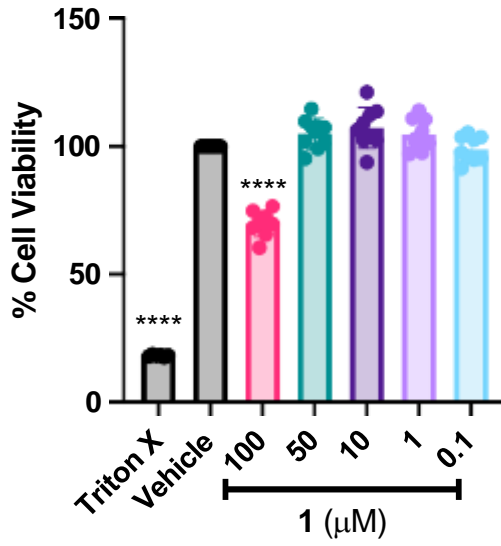

**CHLA255**

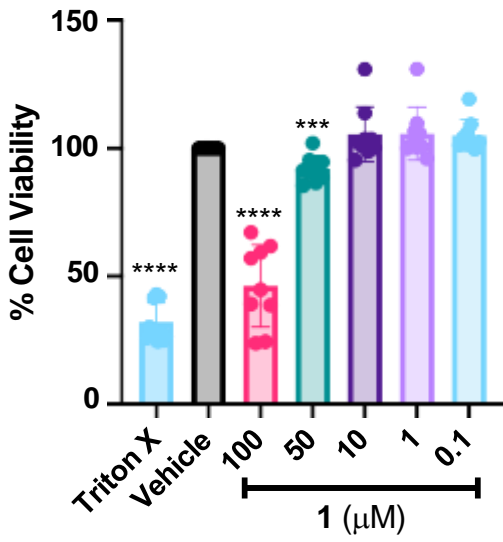

**HPNE**

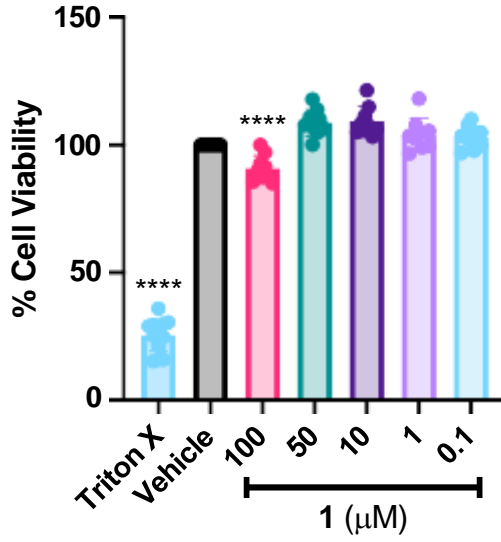

# SK-N-MC

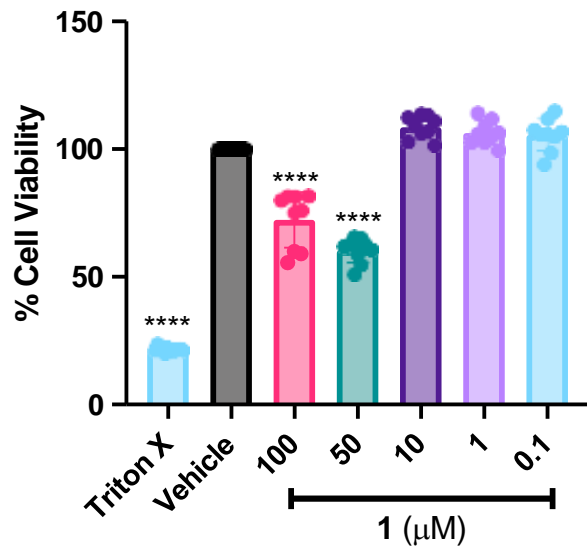

**Table S1.** Melting temperature ( $T_m$ ) of 17 $\beta$ -HSD10 in the presence of **1**, Frentizole, **14a**, **14b**, **14c**, and **14d** derived from thermal denaturation curves. a) Both **1** and Frentizole induce dose-dependent shifts in 17 $\beta$ -HSD10  $T_m$ . b) No significant shifts in  $T_m$  observed with **14a**, **14b**, **14c**, and **14d**.

|            |                   | Conc.<br>( $\mu$ M) | $T_m$<br>Mean | Std. Error   | $\Delta T_m$<br>Mean |
|------------|-------------------|---------------------|---------------|--------------|----------------------|
| <b>a</b>   | <b>DMSO</b>       |                     | <b>42.78</b>  | <b>0.27</b>  | <b>-</b>             |
|            | <b>Frentizole</b> | <b>5</b>            | <b>44.28</b>  | <b>0.25</b>  | <b>1.49</b>          |
|            |                   | <b>10</b>           | <b>44.93</b>  | <b>0.26</b>  | <b>2.15</b>          |
|            |                   | <b>25</b>           | <b>46.42</b>  | <b>0.21</b>  | <b>3.64</b>          |
|            |                   | <b>50</b>           | <b>46.61</b>  | <b>0.05</b>  | <b>3.83</b>          |
|            |                   | <b>100</b>          | <b>47.78</b>  | <b>0.36</b>  | <b>4.99</b>          |
|            | <b>1</b>          | <b>5</b>            | <b>42.32</b>  | <b>0.10</b>  | <b>- 0.42</b>        |
|            |                   | <b>10</b>           | <b>42.33</b>  | <b>0.12</b>  | <b>- 0.41</b>        |
|            |                   | <b>25</b>           | <b>41.97</b>  | <b>0.19</b>  | <b>- 0.77</b>        |
|            |                   | <b>50</b>           | <b>41.67</b>  | <b>0.15</b>  | <b>- 1.07</b>        |
| <b>100</b> |                   | <b>40.64</b>        | <b>0.28</b>   | <b>- 2.1</b> |                      |
| <b>b</b>   | <b>DMSO</b>       |                     | <b>43.55</b>  | <b>0.06</b>  | <b>-</b>             |
|            | <b>14a</b>        | <b>100</b>          | <b>43.40</b>  | <b>0.09</b>  | <b>- 0.15</b>        |
|            | <b>14b</b>        | <b>100</b>          | <b>43.54</b>  | <b>0.05</b>  | <b>- 0.01</b>        |
|            | <b>14c</b>        | <b>100</b>          | <b>43.35</b>  | <b>0.00</b>  | <b>- 0.20</b>        |
|            | <b>14d</b>        | <b>100</b>          | <b>43.35</b>  | <b>0.08</b>  | <b>- 0.20</b>        |



**Figure S3.** Melt curve and derivative plot of 17 $\beta$ -HSD10 treated with either DMSO, **14a**, **14b**, **14c**, or **14d** at 100  $\mu$ M. Conditions: 20 mM Bis-tris pH 6.5, 150 mM NaCl, 0.3 mM TCEP, 10  $\mu$ M ABAD, 1x dye.

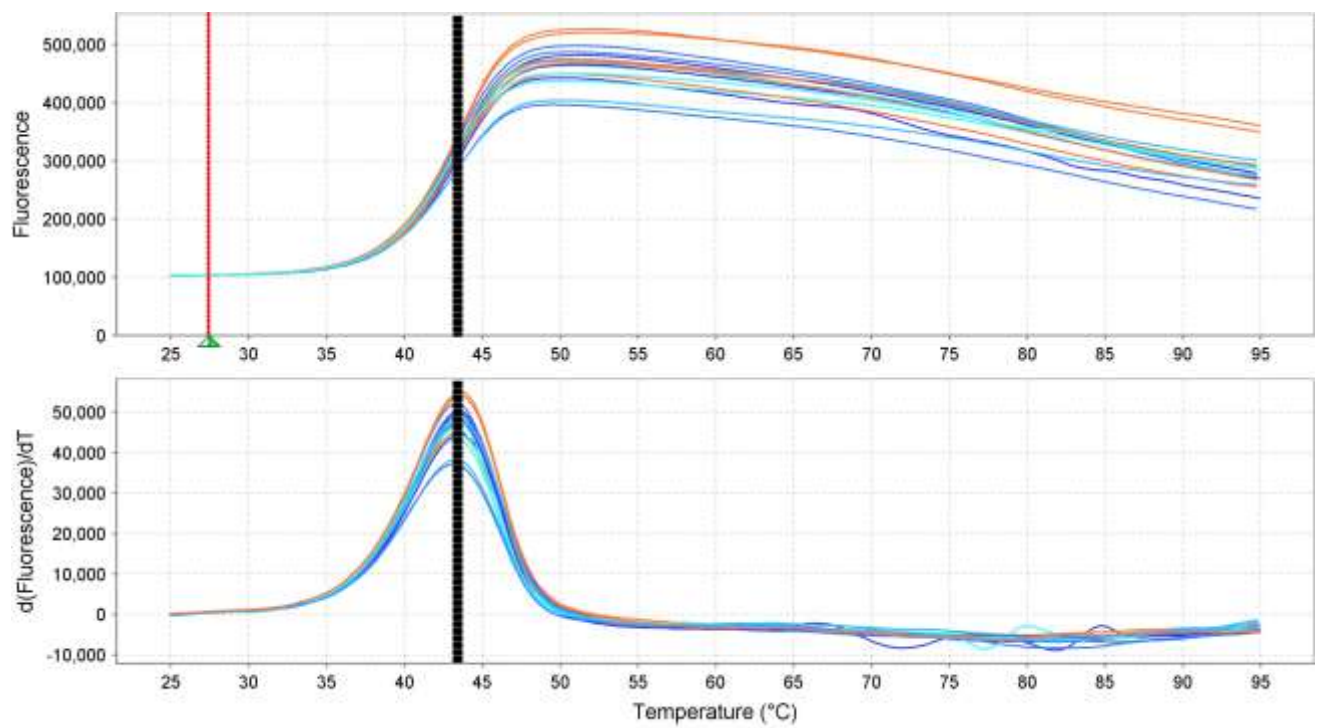

■ DMSO    ■ 14c (100  $\mu$ M)    ■ 14a (100  $\mu$ M)    ■ 14d (100  $\mu$ M)    ■ 14b (100  $\mu$ M)

## To the Synthesis of *N*-benzyl-2-(1-benzyl-1*H*-pyrazol-4-yl)-*N*-methylethan-1-amine (5c)

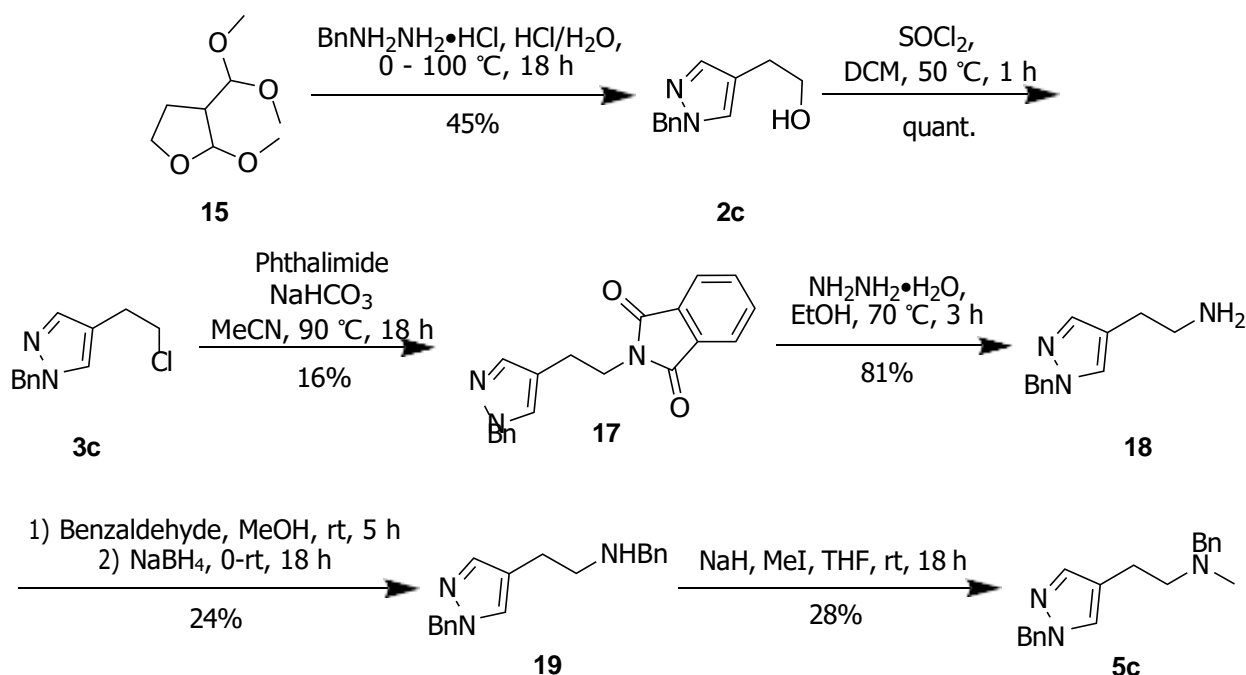

### Synthesis of 2-(1-benzyl-1*H*-pyrazol-4-yl)ethan-1-ol (**2c**)

To a cooled solution of 3-(dimethoxymethyl)-2-methoxytetrahydrofuran (16.54 g, 93.8 mmol, 1 equiv.) and benzylhydrazine dihydrochloride (18.3 g, 93.8 mmol, 1 equiv.) in water (4.0 mL) was added hydrochloric acid (12 M) (11.0 mL, 375 mmol, 4 equiv.) dropwise. The reaction was then stirred at  $0\text{ }^\circ\text{C}$  for 30 minutes and then heated at reflux for 18 h. The reaction was cooled to room temperature, basified by addition of 4 M sodium hydroxide to pH 9 and then diluted with dichloromethane (50 mL). The phases were separated, and the aqueous extracted with dichloromethane (2 x 25 mL); the combined organics were washed with sat. brine (50 mL), dried ( $\text{MgSO}_4$ ), and concentrated *in vacuo*. The crude material was purified by normal phase chromatography 0-50% ethyl acetate/hexane to afford 2-(1-benzyl-1*H*-pyrazol-4-yl)ethan-1-ol (8.56 g, 93.8 mmol, 45%) as a colorless oil.

$^1\text{H}$  NMR (400 MHz,  $\text{DMSO}-d_6$ ):  $\delta_{\text{H}}$  2.54 (t,  $J = 7.08\text{ Hz}$ , 2H), 3.48-3.56 (m, 2H), 4.60 (t,  $J = 5.2\text{ Hz}$ , 1H), 5.24 (s, 2H), 7.19- 7.23 (m, 2H), 7.24-7.36 (m, 4H), 7.59 (s, 1H).

$^{13}\text{C}$  NMR (100 MHz,  $\text{DMSO}-d_6$ ):  $\delta_{\text{C}}$  22.54, 38.50, 54.57, 116.84, 123.00, 127.12, 127.33, 128.35, 128.94, 131.48, 134.37, 137.78, 138.69, 167.72.

### Synthesis of 1-benzyl-4-(2-chloroethyl)-1*H*-pyrazole hydrochloride (3c)

To a solution of 2-(1-benzyl-1*H*-pyrazol-4-yl)ethan-1-ol (500 mg, 2.47 mmol, 1 equiv.) in dichloromethane (1.0 mL) was added thionyl chloride (0.90 mL, 12.4 mmol, 5 equiv.) the reaction was stirred at room temperature open to the air for 30 minutes. The reaction was concentrated *in vacuo* to afford 1-benzyl-4-(2-chloroethyl)-1*H*-pyrazole hydrochloride (758 mg, quant.) as an orange solid.

<sup>1</sup>H NMR (400 MHz, DMSO-D<sub>6</sub>): δ<sub>H</sub> 2.85 (t, *J* = 6.96 Hz, 2H), 3.73 (t, *J* = 7.00 Hz, 2H), 5.30 (s, 2H), 7.19-7.24 (m, 2H), 7.24-7.36 (m, 3H), 7.47 (s, 1H), 7.76 (s, 1H), 11.39 (br.s, 2H).

<sup>13</sup>C NMR (100 MHz, DMSO-D<sub>6</sub>): δ<sub>C</sub> 27.86, 45.75, 55.08, 117.95, 128.04, 128.11, 128.98, 129.98, 137.84, 138.80.

### Synthesis of 2-(2-(1-benzyl-1*H*-pyrazol-4-yl)ethyl)isoindoline-1,3-dione (17)

To a solution of 1-benzyl-4-(2-chloroethyl)-1*H*-pyrazole hydrochloride (5.75 g, 22.4 mmol, 1 equiv.) and potassium phthalimide (4.56 g, 24.6 mmol, 1.1 equiv.) in dimethylformamide (25.6 mL) was added sodium bicarbonate (2.82 g, 33.5 mmol, 1.5 equiv.), the reaction was heated at reflux under nitrogen for 72 h. The reaction was filtered, and the solution was concentrated *in vacuo*. The residue was dissolved in water (70 mL) and ethyl acetate (30 mL), the phases were separated, and the aqueous was extracted with ethyl acetate (30 mL). The combined organics were washed with water (30 mL) and sat. brine (30 mL), dried (MgSO<sub>4</sub>), and concentrated *in vacuo*. The crude material was purified by normal phase chromatography 0-40% ethyl acetate/hexane to afford 2-(2-(1-benzyl-1*H*-pyrazol-4-yl)ethyl)isoindoline-1,3-dione (5.88 g, 17.7 mmol, 79%) as a white solid.

<sup>1</sup>H NMR (400 MHz, DMSO-D<sub>6</sub>): δ<sub>H</sub> 2.77 (t, *J* = 7.20 Hz, 2H), 3.74 (t, *J* = 7.20 Hz, 2H), 5.22 (s, 2H), 7.04-7.09 (m, 2H), 7.22-7.30 (m, 4H), 7.62 (s, 1H), 7.79-7.95 (m, 4H).

<sup>13</sup>C NMR (100 MHz, DMSO-D<sub>6</sub>): δ<sub>C</sub> 22.54, 54.57, 116.84, 123.00, 127.12, 127.33, 128.35, 128.94, 131.48, 134.37, 137.79, 138.69, 167.72.

### Synthesis of 2-(1-benzyl-1*H*-pyrazol-4-yl)ethan-1-amine (18)

To a solution 2-(2-(1-benzyl-1*H*-pyrazol-4-yl)ethyl)isoindoline-1,3-dione (500 mg, 1.51 mmol, 1 equiv.) in ethanol (1.0 mL) was added hydrazine hydrate (0.18 mL, 3.03 mmol, 2 equiv.), the reaction was heated at reflux in a

sealed tube for 18 h. The reaction was filtered, and the solution was concentrated *in vacuo*. The crude material was purified by normal phase chromatography 0-5:0.5% methanol:ammonia/dichloromethane to afford 2-(1-benzyl-1*H*-pyrazol-4-yl)ethan-1-amine (186 mg, 0.92 mmol, 61 %) as a colorless solid.

<sup>1</sup>H NMR (400 MHz, MeOH-D<sub>4</sub>): δ<sub>H</sub> 2.69 (t, *J* = 7.20 Hz, 2H), 2.90 (t, *J* = 7.20 Hz, 2H), 5.29 (s, 2H), 7.19-7.24 (m, 2H), 7.24-7.7.36 (m, 3H), 7.41 (s, 1H), 7.55 (s, 1H).

<sup>13</sup>C NMR (100 MHz, MeOH-D<sub>4</sub>): δ<sub>C</sub> 26.72, 42.91, 56.47, 119.65, 128.60, 128.97, 129.74, 130.41, 138.38, 140.04.

### Synthesis of *N*-benzyl-2-(1-benzyl-1*H*-pyrazol-4-yl)ethan-1-amine (19)

To a solution of 2-(1-benzyl-1*H*-pyrazol-4-yl)ethan-1-amine (500 mg, 2.48 mmol, 1 equiv.) in methanol (5 mL) was added benzaldehyde (0.25 mL, 2.48 mmol, 1 equiv.) and MgSO<sub>4</sub> the reaction was stirred at room temperature for 3 h. The reaction was cooled to 0 °C and sodium borohydride (282 mg, 7.45 mmol, 3 equiv.) was added in 2 portions. The reaction was warmed to room temperature and stirred under nitrogen for 18 h. The reaction was concentrated *in vacuo*. The residue was purified by normal phase chromatography 0-5:0.5 methanol:ammonia/dichloromethane to afford *N*-benzyl-2-(1-benzyl-1*H*-pyrazol-4-yl)ethan-1-amine (176 mg, 0.60 mmol, 24 %) as a colorless oil.

<sup>1</sup>H NMR (400 MHz, DMSO-D<sub>6</sub>): δ<sub>H</sub> 2.54 (t, *J* = 7.20 Hz, 2H), 2.65 (t, *J* = 6.80 Hz, 2H), 5.70 (s, 2H), 5.24 (s, 2H), 7.15-7.23 (m, 3H), 7.24-7.35 (m, 8H), 7.58 (s, 1H).

ESI-HRMS (m/z): [M+H]<sup>+</sup> calc. for C<sub>19</sub>H<sub>21</sub>N<sub>3</sub>, 292.1808; found, 292.2000

### Synthesis of *N*-benzyl-2-(1-benzyl-1*H*-pyrazol-4-yl)-*N*-methylethan-1-amine (5c)

To a solution of *N*-benzyl-2-(1-benzyl-1*H*-pyrazol-4-yl)ethan-1-amine (1.13 g, 3.86 mmol, 1 equiv.) in tetrahydrofuran (10 mL) was added sodium hydride (60% dispersion in mineral oil) (200 mg, 5.02 mmol, 1.3 equiv.) the reaction was stirred under nitrogen for 30 minutes after which methyl iodide (0.27 mL, 4.24 mmol, 1.1 equiv.) was added and the reaction stirred at room temperature for 18 h. The reaction was quenched with water (20 mL) and diluted with ethyl acetate. The phases separated, and the aqueous extracted with ethyl acetate (2 x 20 mL); the combined organics were washed with water (10 mL) and sat. brine (10 mL), dried (MgSO<sub>4</sub>) and concentrated *in vacuo*. The crude material was purified by chromatography 0-2.5:0.25

methanol:ammonia/dichloromethane to afford *N*-benzyl-2-(1-(4-methoxybenzyl)-1*H*-pyrazol-4-yl)-*N*-methylethan-1-amine (326 mg, 1.07 mmol, 28 %) as a colorless oil.

<sup>1</sup>H NMR (500 MHz, MeOH-D<sub>4</sub>): δ<sub>H</sub> 2.25 (s, 3H), 2.59 (t, *J* = 7.95 Hz, 2H), 2.70 (t, *J* = 7.40 Hz, 2H), 3.56 (s, 2H), 5.26 (s, 2H), 7.19 (d, *J* = 7.6 Hz, 2H), 7.22-7.36 (m, 9H), 7.47 (s, 1H).

ESI-HRMS (*m/z*): [*M*+*H*]<sup>+</sup> calc. for C<sub>20</sub>H<sub>23</sub>N<sub>3</sub>, 306.1965; found, 306.1972

### To the Synthesis of *N*-benzyl-2-(1-(4-methoxybenzyl)-1*H*-pyrazol-4-yl)-*N*-methylethan-1-amine (5d)

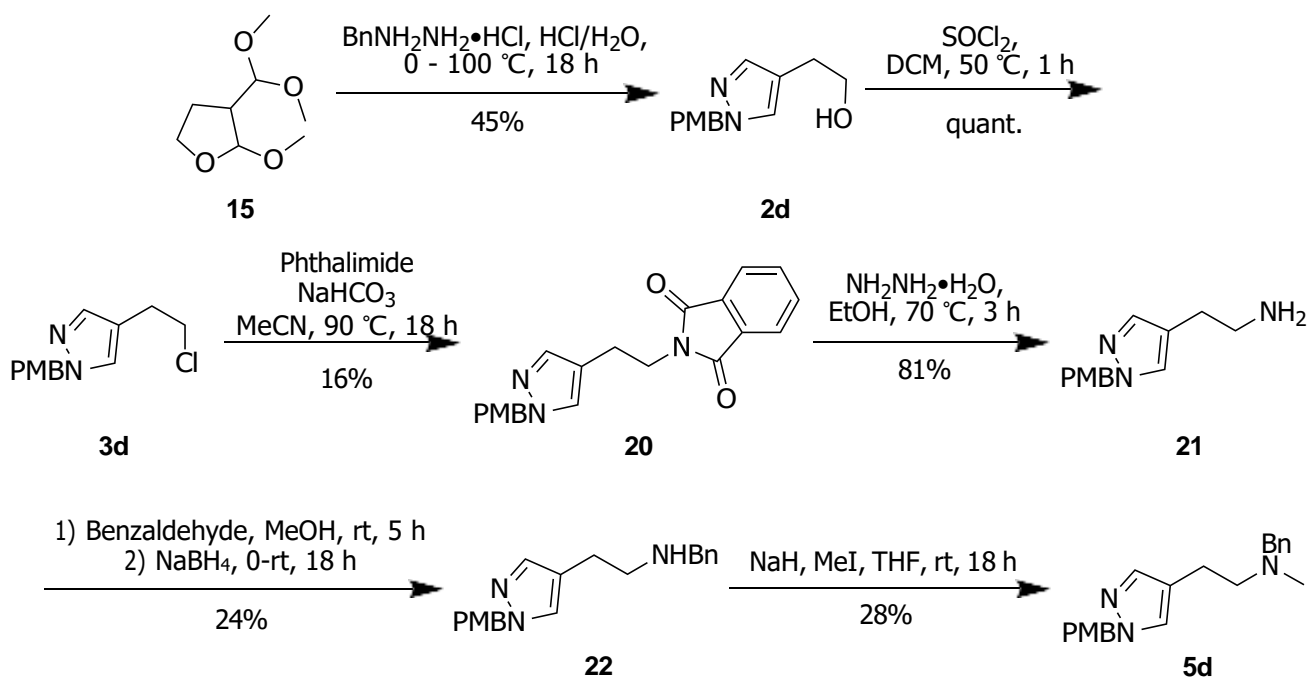

### **Synthesis of 2-(1-(4-methoxybenzyl)-1*H*-pyrazol-4-yl)ethan-1-ol (2d)**

To a suspension of (4-methoxybenzyl)hydrazine hydrochloride (28.5 g, 137 mmol, 1 equiv.) and 3-(dimethoxymethyl)-2-methoxytetrahydrofuran (24.2 g, 137 mmol, 1 equiv.) in water was added hydrochloric acid (21.0 mL, 687 mmol, 5 equiv.) dropwise, the reaction was stirred at room temperature for 30 minutes after which the reaction was heated at reflux for 3 h. The reaction was diluted with tetrahydrofuran (40 mL), and the solid was removed by filtration and washed with diethyl ether (2 x 20 mL). The solution was added slowly to sat. potassium carbonate (200 mL), the phases were separated, and the aqueous was extracted with n-butanol (150 mL), the combined organics were dried ( $\text{MgSO}_4$ ) and concentrated *in vacuo*. The crude material was purified by normal phase chromatography 0-100% ethyl acetate/hexane to afford 2-(1-(4-methoxybenzyl)-1*H*-pyrazol-4-yl)ethan-1-ol (4.17 g, 17.9 mmol, 13%) as a yellow oil.

<sup>1</sup>H NMR (400 MHz, MeOH-D<sub>4</sub>): δ<sub>H</sub> 2.50-2.53 (m, 2H), 3.46-3.51 (m, 2H), 3.72 (s, 3H), 5.89 (t, *J* = 4.8 Hz, 1H), 5.15 (s, 2H), 6.88 (d, *J* = 8.7 Hz, 2H), 7.18 (d, *J* = 8.64 Hz, 2H), 7.26 (s, 1H), 7.53 (s, 1H).

<sup>13</sup>C NMR (100 MHz, MeOH-D<sub>4</sub>): δ<sub>C</sub> 27.71, 54.16, 55.08, 61.82, 113.82, 117.97, 128.15, 129.11, 129.72, 138.55, 158.70.

### **Synthesis of 4-(2-chloroethyl)-1-(4-methoxybenzyl)-1*H*-pyrazole hydrochloride (3d)**

To a solution of 2-(1-(4-methoxybenzyl)-1*H*-pyrazol-4-yl)ethan-1-ol (3.10 g, 13.3 mmol, 1 equiv.) in dichloromethane (40 mL) was added thionyl chloride (4.87 mL 66.7 mmol, 5 equiv.) the reaction was heated at reflux for 1 h. The reaction was concentrated *in vacuo* and azeotropes with methyl *tert*-butyl ether (2 x 20 mL) to afford crude 4-(2-chloroethyl)-1-(4-methoxybenzyl)-1*H*-pyrazole hydrochloride (3.80 g, 13.2 mmol, 99%) as an orange solid.

<sup>1</sup>H NMR (600 MHz, DMSO-D<sub>6</sub>): δ<sub>H</sub> 2.84 (t, *J* = 6.5 Hz, 2H), 3.37-3.73 (m, 4H), 5.19 (s, 2H), 6.88 (d, *J* = 9.0 Hz, 2H), 7.90 (d, *J* = 8.4 Hz, 2H), 7.39 (s, 1H), 7.66 (s, 1H).

### **Synthesis of 2-(2-(1-(4-methoxybenzyl)-1*H*-pyrazol-4-yl)ethyl)isoindoline-1,3-dione (20)**

To a suspension of 4-(2-chloroethyl)-1-(4-methoxybenzyl)-1*H*-pyrazole hydrochloride (4.49 g, 15.7 mmol, 1 equiv.) and sodium bicarbonate (3.29 g, 15.7 mmol, 1.5 equiv.) in dimethylformamide (40.0 mL) was added potassium phthalimide (3.19 g, 17.2 mmol, 1.1 equiv.) the reaction was heated at reflux under nitrogen for 18 h. The solvent was reduced *in vacuo*, and the residue was partitioned between ethyl acetate (75 mL) and water (200 mL); the aqueous was extracted ethyl acetate (75 mL), and the combined organics washed with water (100 mL), sat. brine (50 mL) dried (MgSO<sub>4</sub>) and concentrated *in vacuo*. The crude material was purified by normal phase chromatography 0-40% ethyl acetate/hexane to afford 2-(2-(1-(4-methoxybenzyl)-1*H*-pyrazol-4-yl)ethyl)isoindoline-1,3-dione (5.13 g, 14.2 mmol, 91%) as a yellow/brown oil.

<sup>1</sup>H NMR (600 MHz, MeOH-D<sub>4</sub>): δ<sub>H</sub> 2.87 (t, *J* = 5.90 Hz, 2H), 3.77 (s, 3H), 3.84 (t, *J* = 5.90 Hz, 2H), 5.14 (s, 2H), 6.80 (d, *J* = 7.25 Hz, 2H), 7.03 (d, *J* = 7.20 Hz, 2H), 7.33 (s, 1H), 7.42 (s, 1H), 7.76-7.82 (m, 4H).

<sup>13</sup>C NMR (150 MHz, MeOH-D<sub>4</sub>): δ<sub>C</sub> 21.92, 37.90, 53.80, 53.97, 113.12, 117.21, 122.19, 127.93, 128.32, 128.44, 131.33, 133.44, 138.19, 158.91, 167.73.

### Synthesis of 2-(1-(4-methoxybenzyl)-1H-pyrazol-4-yl)ethan-1-amine (21)

A solution of 2-(2-(1-(4-methoxybenzyl)-1H-pyrazol-4-yl)ethyl)isoindoline-1,3-dione (3.29 g, 9.10 mmol, 1 equiv.) in methanol (50 mL) was heated at 70 °C after which hydrazine hydrate (2.21 mL, 36.4 mmol, 4 equiv.) was added the reaction was heated at 70 °C for 18 h. The reaction was filtered, and the solution was concentrated *in vacuo*. The solid was dissolved in ethyl acetate (50 mL) and aq sat. K<sub>2</sub>CO<sub>3</sub> (50 mL), the phases were separated, and the aqueous was extracted with ethyl acetate (50 mL). The combined organics were washed with sat. aq K<sub>2</sub>CO<sub>3</sub> (20 mL) NaHCO<sub>3</sub> (20 mL) and sat. brine (20 mL), dried (MgSO<sub>4</sub>) and concentrated *in vacuo* to afford 2-(1-(4-methoxybenzyl)-1H-pyrazol-4-yl)ethan-1-amine (1.34 g, 5.79 mmol, 64%) as a yellow oil.

<sup>1</sup>H NMR (400 MHz, DMSO-D<sub>6</sub>): δ<sub>H</sub> 2.44 (t, *J* = 7.20 Hz, 2H), 2.67 (t, *J* = 7.04 Hz, 2H), 3.72 (s, 3H), 5.15 (s, 2H), 6.85-6.91 (m, 2H), 7.14-7.21 (m, 2H), 7.26 (s, 1H), 7.53 (s, 1H).

<sup>13</sup>C NMR (100 MHz, DMSO-D<sub>6</sub>): δ<sub>C</sub> 18.56, 20.49, 26.94, 42.31, 48.60, 54.20, 55.08, 56.02, 113.83, 118.30, 125.24, 127.96, 128.14, 129.09, 129.68, 132.03, 138.42, 155.55, 158.71.

### Synthesis of N-benzyl-2-(1-(4-methoxybenzyl)-1H-pyrazol-4-yl)ethan-1-amine (22)

To a solution of 2-(1-(4-methoxybenzyl)-1H-pyrazol-4-yl)ethan-1-amine (1.34 g, 5.79 mmol, 1 equiv.) in methanol (5.0 ml) was added benzaldehyde (0.59 mL, 5.79 mmol, 1 equiv.) and MgSO<sub>4</sub> the reaction was stirred at room temperature for 3 h. The reaction was cooled to 0 ° C, and sodium borohydride (657 mg, 17.4 mmol, 3 equiv.) was added in 3 portions, and the reaction was stirred at room temperature for 18 h. The reaction was concentrated *in vacuo*. The residue was partitioned between 2-methyl tetrahydrofuran (10 mL) and 2M sodium hydroxide (10 mL), the phases were separated, and the aqueous extracted with 2-methyl tetrahydrofuran (2 x 20 mL). The combined organics were dried (MgSO<sub>4</sub>) and concentrated *in vacuo*. The crude material was purified by normal phase chromatography 0-5:0.5 methanol:ammonia/dichloromethan to afford N-benzyl-2-(1-benzyl-1H-pyrazol-4-yl)ethan-1-amine (355 mg, 1.10 mmol, 19%) as a colorless oil.

<sup>1</sup>H NMR (500 MHz, DMSO-D<sub>6</sub>): δ<sub>H</sub> 2.52 (t, *J* = 7.25 Hz, 2H), 2.63 (t, *J* = 7.05 Hz, 2H), 3.68 (s, 2H), 3.72 (s, 3H), 5.14 (s, 2H), 6.87 (d, *J* = 8.7 Hz, 2H), 7.16 (d, *J* = 8.7 Hz, 2H), 7.18-7.23 (m, 1H), 7.25 (s, 1H), 7.26-7.30 (m, 4H) 7.52 (s, 1H).

$^{13}\text{C}$  NMR (125 MHz, DMSO- $\text{D}_6$ ):  $\delta_{\text{C}}$  24.94, 50.45, 53.32, 54.64, 55.55, 114.29, 119.48, 126.92, 128.33, 128.47, 128.53, 129.52, 130.20, 138.84, 159.16.

### Synthesis of *N*-benzyl-2-(1-(4-methoxybenzyl)-1*H*-pyrazol-4-yl)-*N*-methylethan-1-aminium (5d)

To a solution of 2-(1-(4-methoxybenzyl)-1*H*-pyrazol-4-yl)ethan-1-amine (355 mg, 1.10 mmol, 1 equiv.), in tetrahydrofuran (3.5 mL) was added sodium hydride (53 mg, 1.33 mmol, 1.2 equiv.) the reaction was stirred at room temperature for 1 h after which methyl iodide (0.11 mL, 1.66 mmol, 1.5 equiv.) was added the reaction was stirred at room temperature in a sealed vial for 18 h. Each reaction vial was quenched into water (20 mL) and extracted with ethyl acetate (2 x 20 mL) the combined organics were dried ( $\text{MgSO}_4$ ) and concentrated *in vacuo*. The crude material was purified by normal phase chromatography 0-5:0.5 methanol:ammonia/dichloromethane to afford *N*-benzyl-2-(1-(4-methoxybenzyl)-1*H*-pyrazol-4-yl)-*N*-methylethan-1-amine (250 mg, 0.74 mmol, 68%) a colorless oil.

$^1\text{H}$  NMR (600 MHz, MeOH- $\text{D}_4$ ):  $\delta_{\text{H}}$  2.24 (s, 3H), 2.56-2.59 (m, 2H), 2.68 (t,  $J = 7.2$  Hz, 2H), 3.55 (s, 2H), 3.76 (s, 3H), 5.17 (s, 2H), 6.87 (d,  $J = 8.4$  Hz 2H), 7.15 (d,  $J = 8.4$  Hz, 2H), 7.23-7.30 (m, 5H), 7.32 (s, 1H), 7.41 (s, 1H).

$^{13}\text{C}$  NMR (150 MHz, MeOH- $\text{D}_4$ ):  $\delta_{\text{C}}$  22.76, 42.22, 55.70, 55.92, 59.35, 62.97, 115.07, 120.96, 128.35, 129.31, 129.79, 130.09, 130.33, 130.59, 139.17, 139.79.

### To the synthesis of *N*-benzyl-*N*-methyl-2-(1-(4-methylbenzyl)-1*H*-pyrazole-4-yl)ethan-1-amine 5e

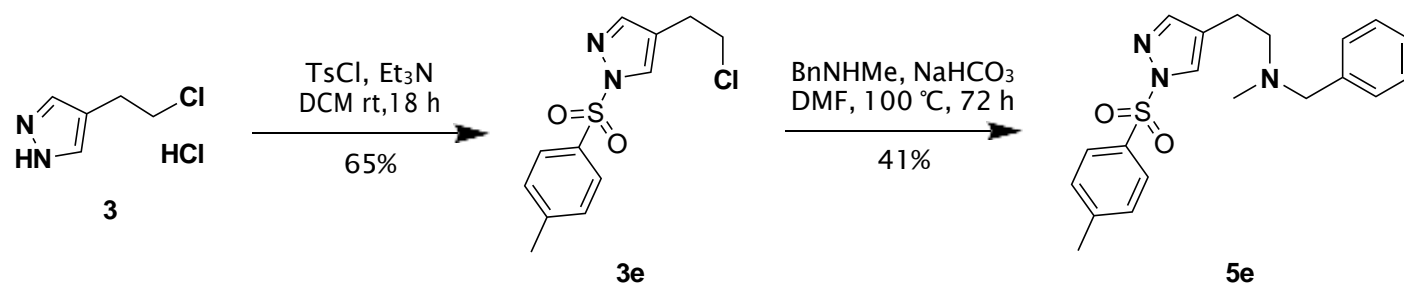

### Synthesis of 4-(2-chloroethyl)-1-tosyl-1*H*-pyrazole 3e

To a solution of 4-(2-chloroethyl)-1*H*-pyrazole hydrochloride (2.00 g, 11.97 mmol, 1 equiv.) and triethylamine (5.01 mL, 35.92 mmol, 3 equiv.) in dichloromethane (20 mL) was added 4-methylbenzenesulfonyl chloride (3.42 g, 17.96 mmol, 1.5 equiv.) the reaction was stirred at room temperature for 18 h. The reaction was diluted with water (20 mL), and the phases were separated and the aqueous was extracted with dichloromethane (2 x 20



mL); the combined organics were washed with sat. sodium bicarbonate solution (2 x 20mL) and sat brine (20 mL) dried (MgSO<sub>4</sub>) and concentrated in vacuo. The crude residue was purified by normal phase chromatography 0-30% ethyl acetate/hexane to afford 4-(2-chloroethyl)-1-tosyl-1*H*-pyrazole (2.23 g, 65%, 7.83 mmol) as a colorless oil.

<sup>1</sup>H NMR (600 MHz, DMSO-D<sub>6</sub>): δ<sub>H</sub> 2.38 (s, 3H), 2.88 (t, *J* = 7.20 Hz, 2H), 3.79 (t, *J* = 7.20 Hz, 2H), 7.45 (d, *J* = 8.4 Hz, 2H), 7.83 (d, *J* = 8.4 Hz, 2H), 7.83 (s, 1H), 8.34 (s, 1H).

<sup>13</sup>C NMR (150 MHz, DMSO-D<sub>6</sub>): δ<sub>C</sub> 26.12, 26.82, 44.34, 121.49, 127.57, 130.32, 130.41, 133.50, 146.06, 146.25.

### Synthesis of *N*-benzyl-*N*-methyl-2-(1-tosyl-1*H*-pyrazole-4-yl)ethan-1-amine 5e

To a suspension of (4-((4-(2-chloroethyl)-1*H*-pyrazol-1-yl)sulfonyl)phenyl)methylum (200 mg, 0.71 mmol, 1 equiv.) and sodium bicarbonate (178 mg, 2.11 mmol 3 equiv.) in DMF (2.0 mL) was added *N*-methyl-1-phenylmethanamine (128 mg, 1.06 mmol, 1.5 equiv.) the reaction was heated in a vial at 100 °C for 72 h. the reaction was quenched into water (30 mL) and extracted with EtOAc (2 x 10 mL) the combined organics were washed with water (5 x 10 mL) and brine (10 mL), dried (MgSO<sub>4</sub>) and concentrated *in vacuo*. The crude residue was purified by normal phase chromatography 0-50% ethyl acetate/hexane (1% triethylamine in both phases) to afford *N*-benzyl-*N*-methyl-2-(1-tosyl-1*H*-pyrazole-4-yl)ethan-1-amine (107 mg, 41%, 0.29 mmol) as a colourless solid.

<sup>1</sup>H NMR (600 MHz, MeOH-D<sub>4</sub>): δ<sub>H</sub> 2.21 (s, 3H), 2.38 (s, 3H), 2.56 (t, *J* = 7.80 Hz, 2H), 2.67 (t, *J* = 7.20 Hz, 2H), 3.50 (s, 2H), 7.19-7.27 (m, 5H), 7.36 (d, *J* = 0.6 Hz, 2H), 7.64 (s, 1H), 7.85 (d, *J* = 8.4 Hz, 2H), 8.08 (s, 1H).

<sup>13</sup>C NMR (150 MHz, MeOH-D<sub>4</sub>): δ<sub>C</sub> 21.60, 22.47, 42.12, 58.13, 63.00, 124.80, 128.24, 128.95, 129.28, 130.36, 130.73, 131.12, 135.57, 139.39, 147.18, 147.40.

4-(chloromethyl)-1H-pyrazole hydrochloride

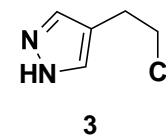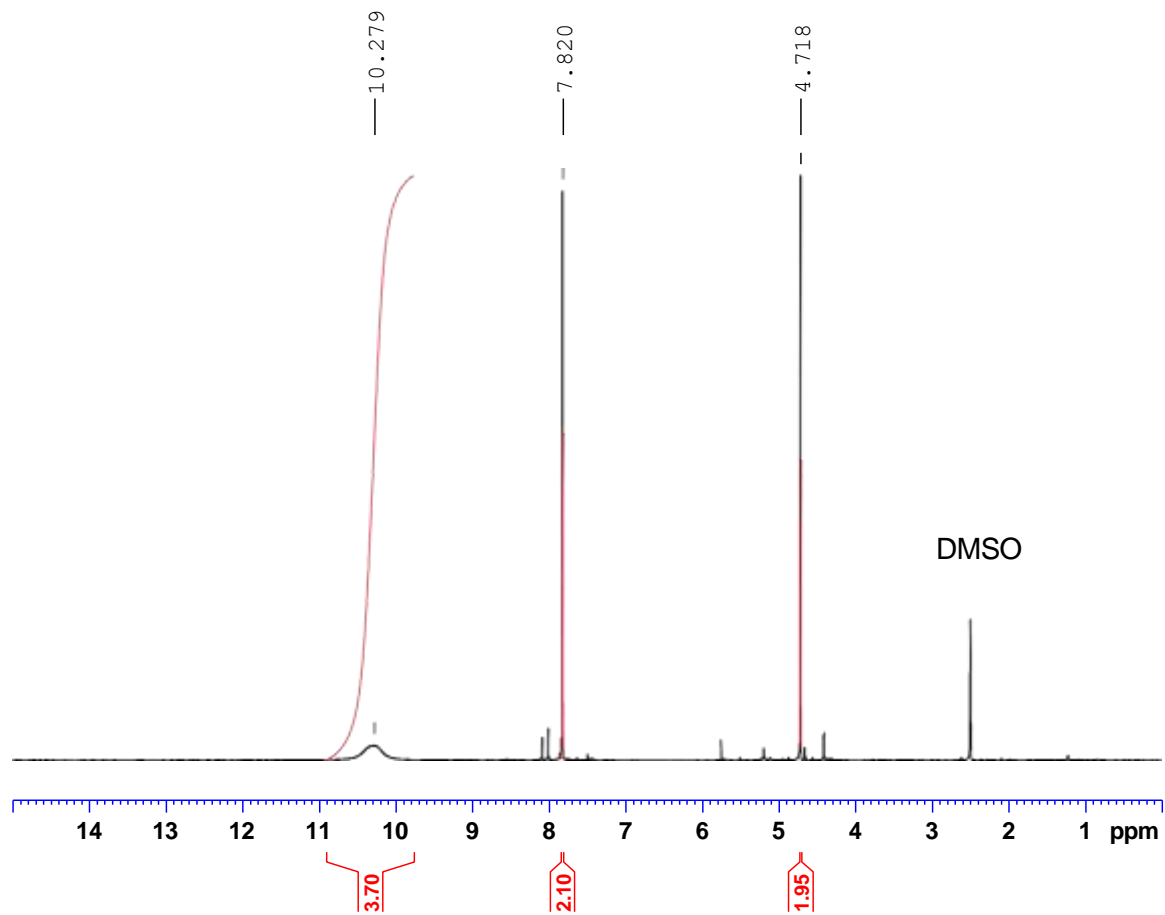

4-(2-chloroethyl)-1H-pyrazole hydrochloride (

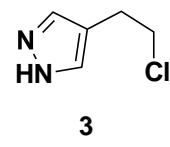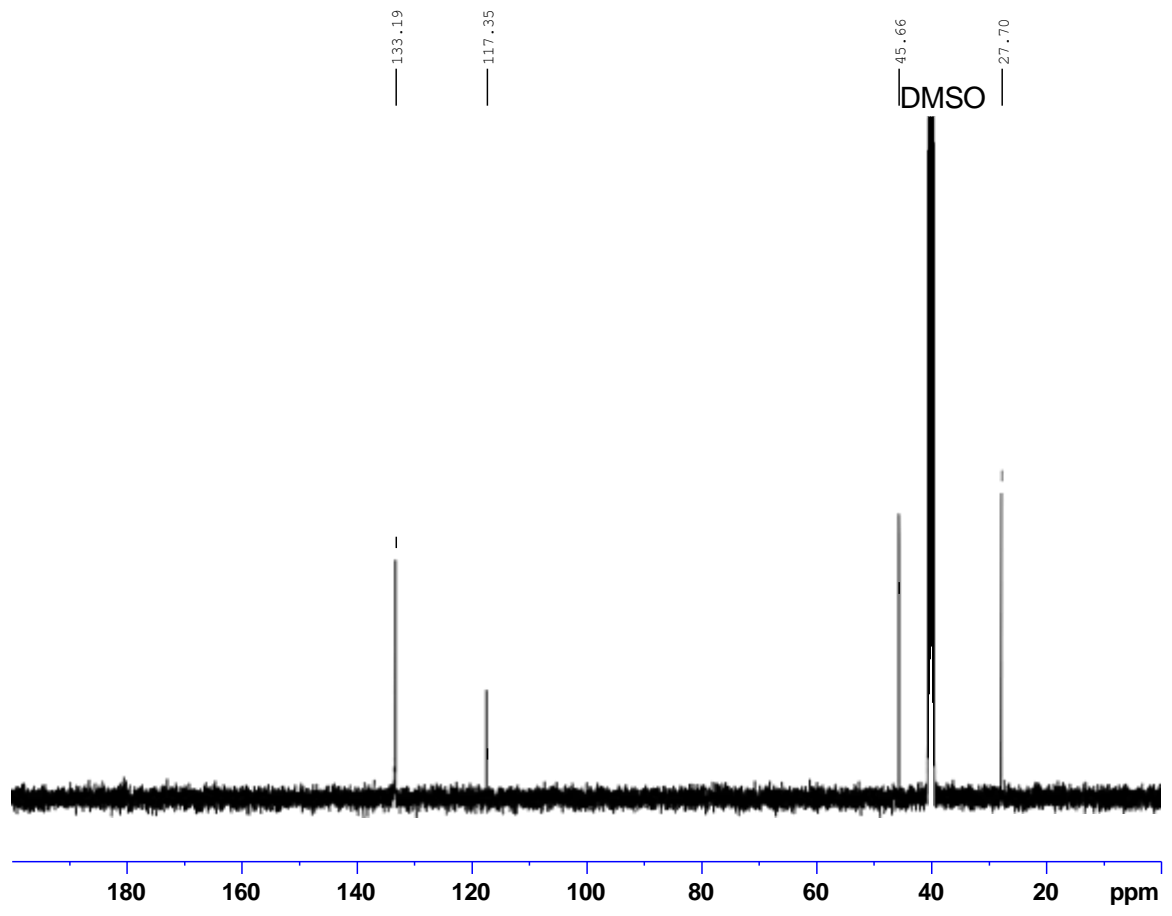

tert-butyl 4-(2-chloroethyl)-1H-pyrazole-1-carboxylate

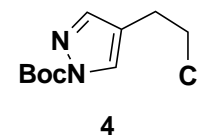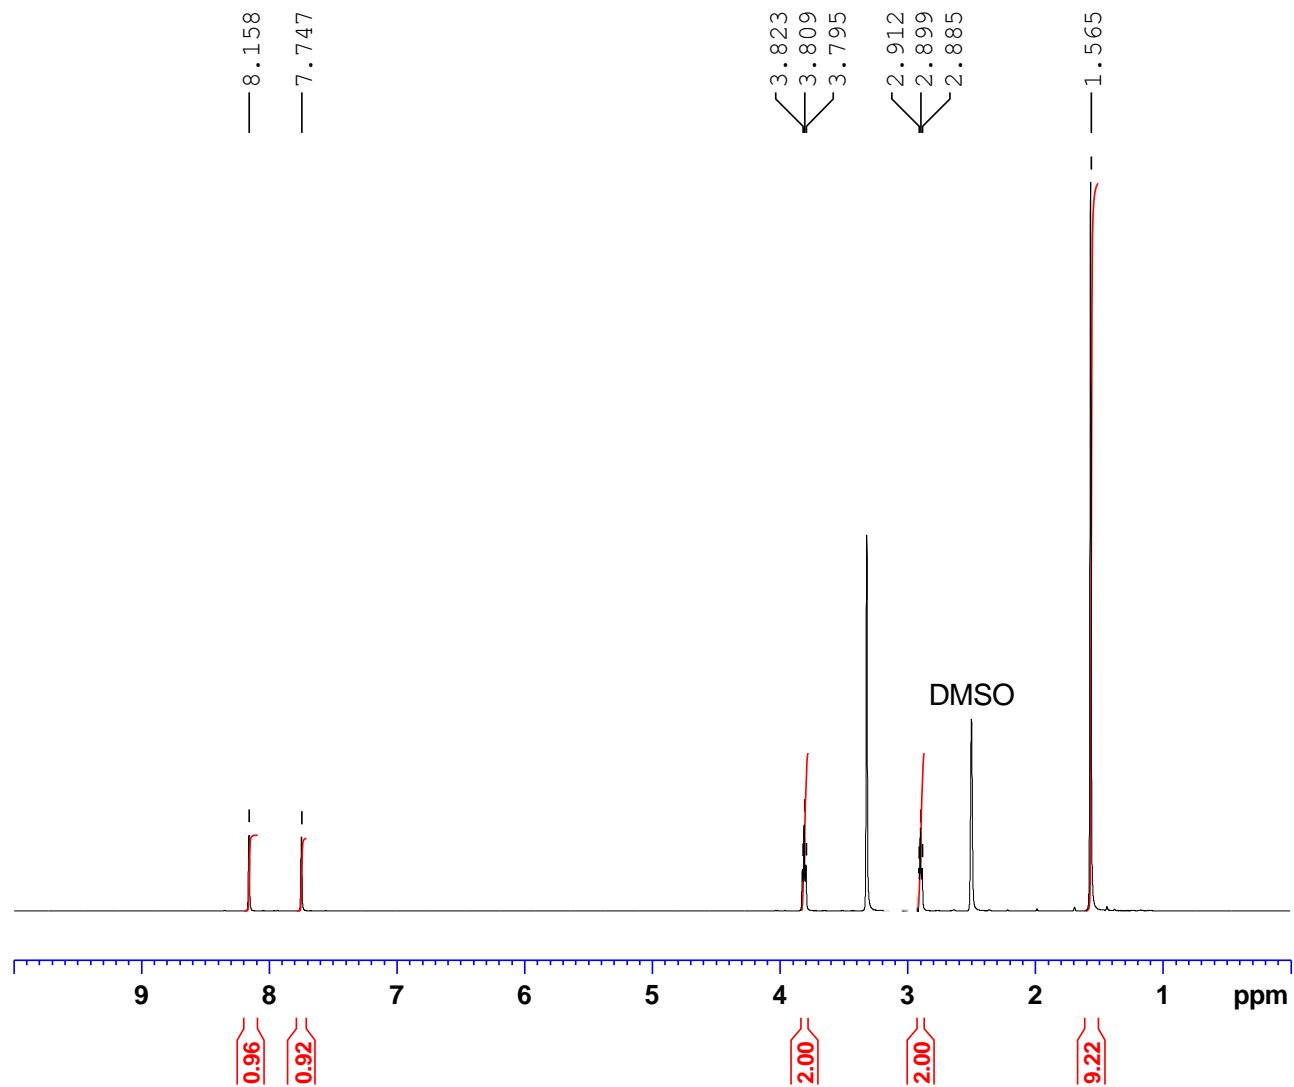

tert-butyl 4-(2-chloroethyl)-1H-pyrazole-1-carboxylate

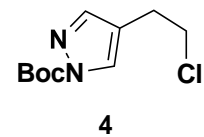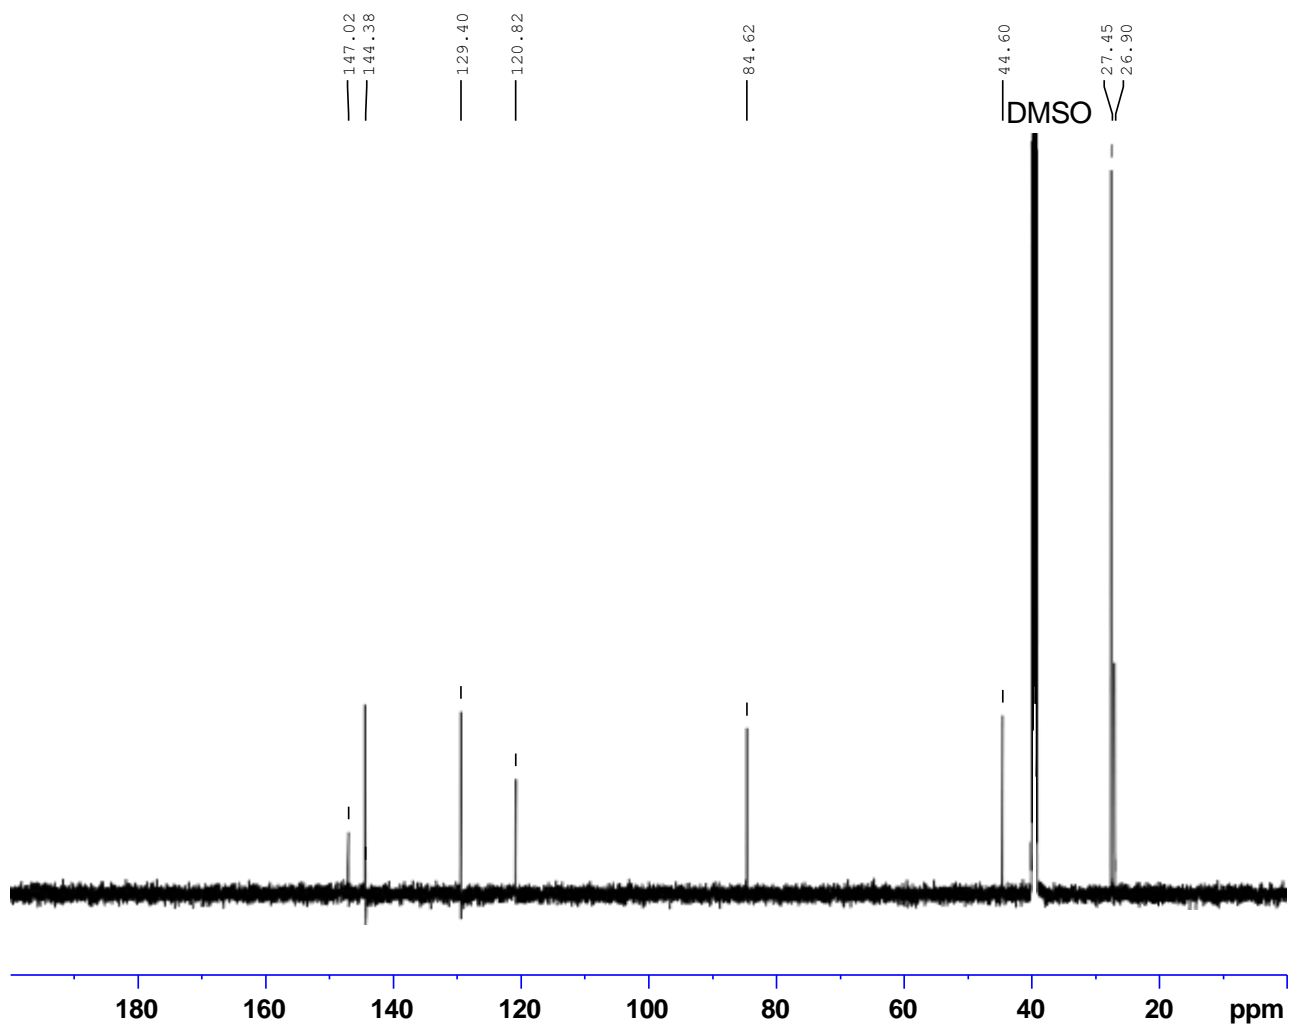

N-benzyl-N-methyl-2-(1H-pyrazol-4-yl)ethan-1-amine

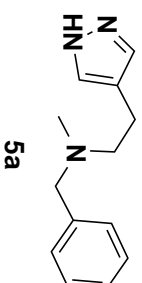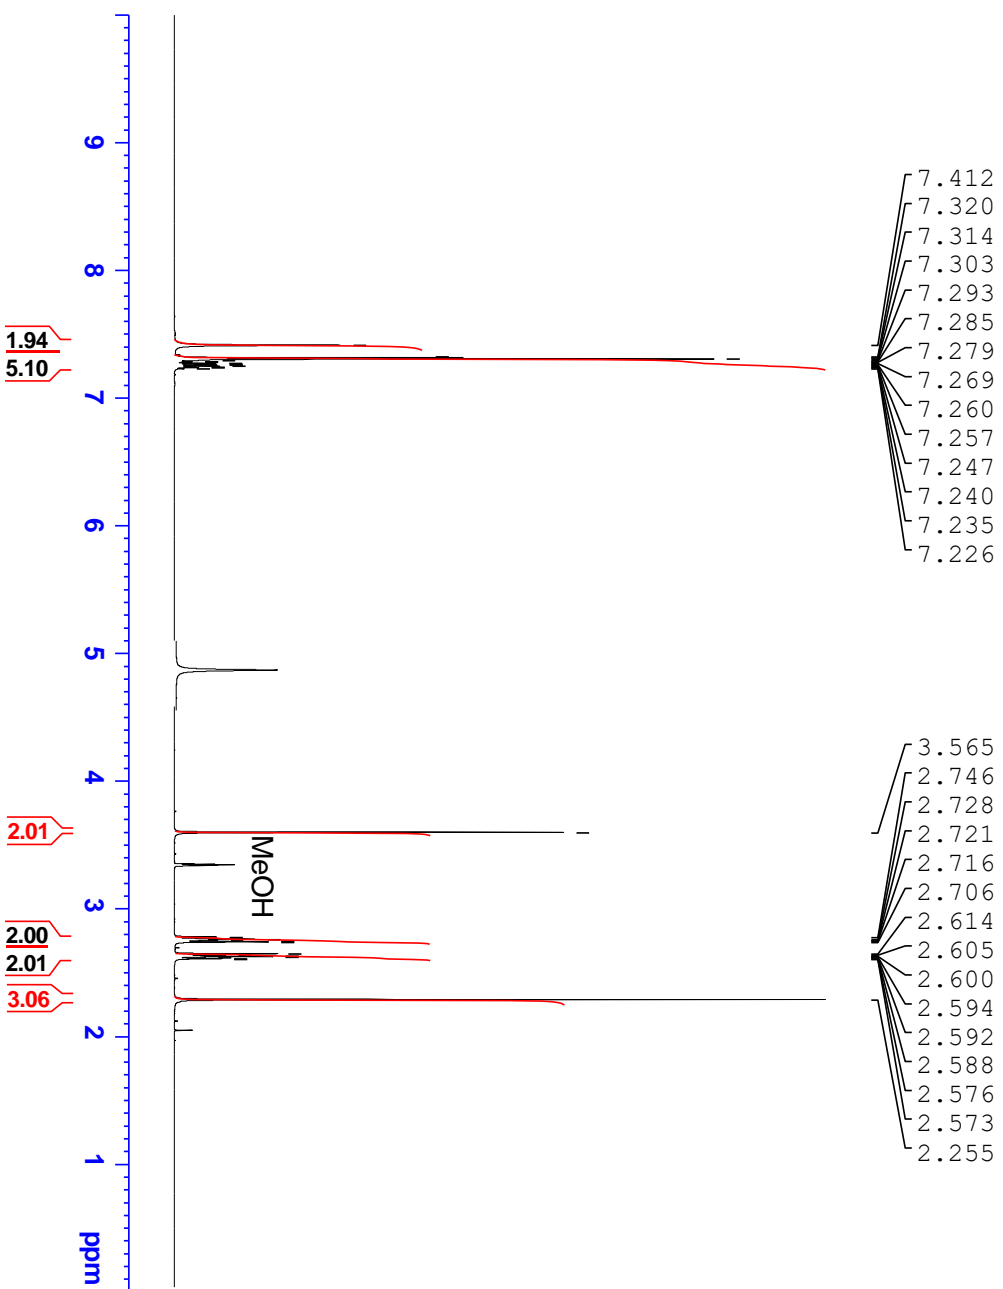

N-benzyl-N-methyl-2-(1H-pyrazol-4-yl)ethan-1-amine

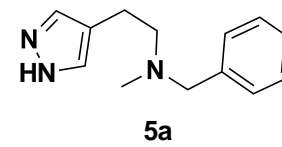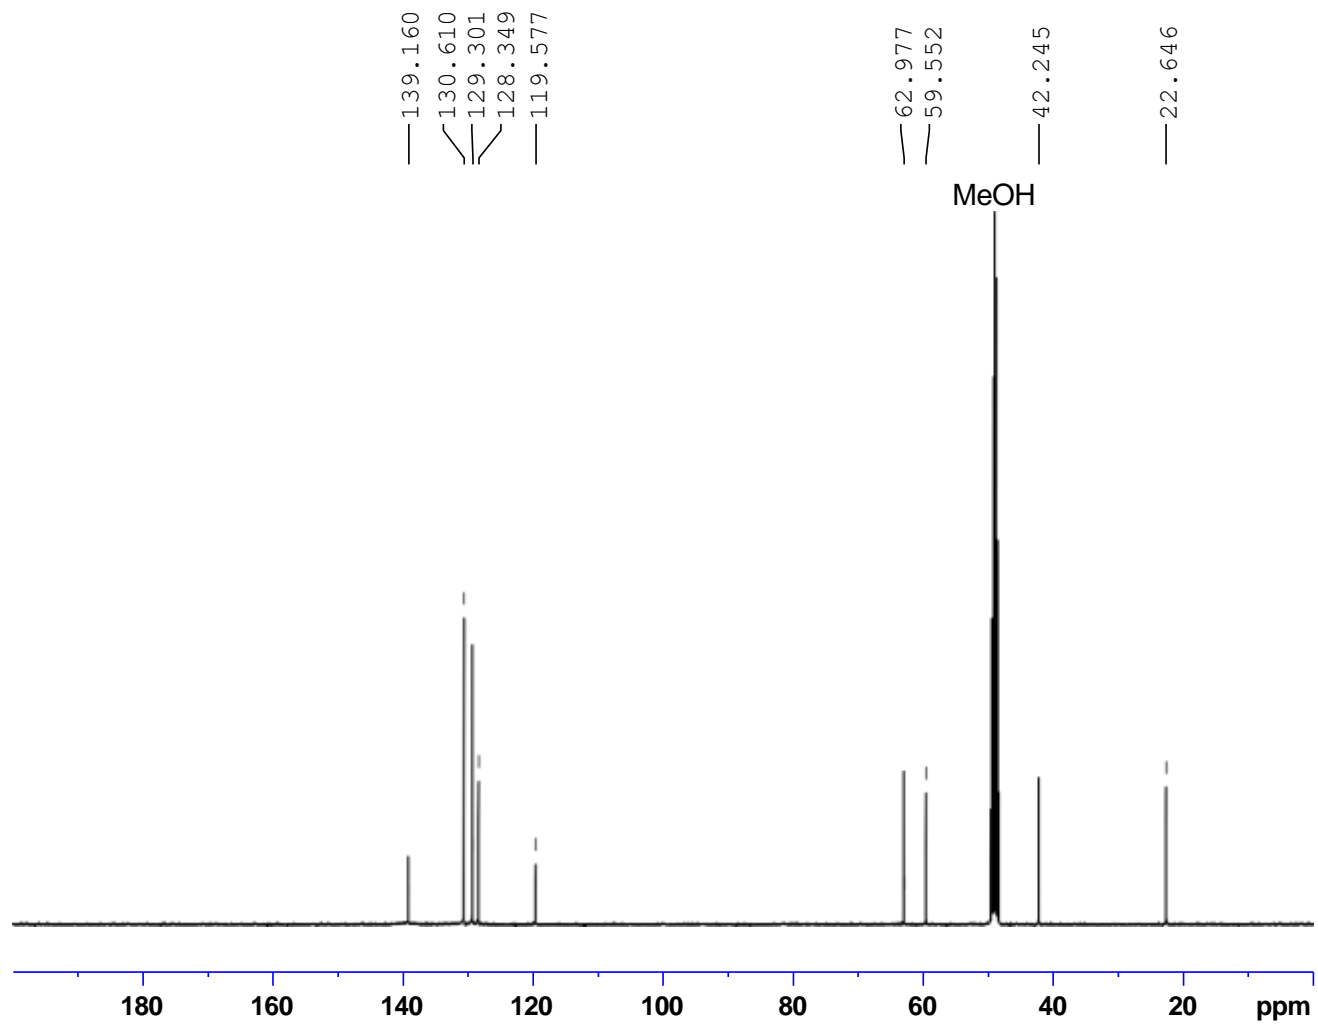

tert-butyl 4-(2-(benzyl(methyl)amino)ethyl)-1H-pyrazole-1-carboxylate

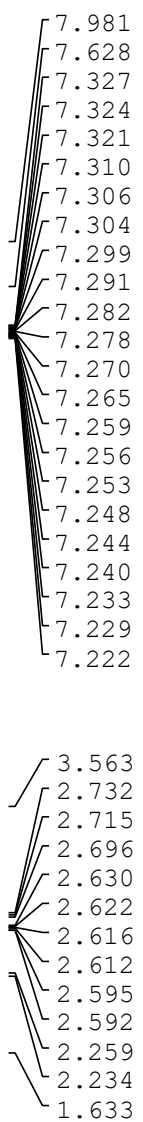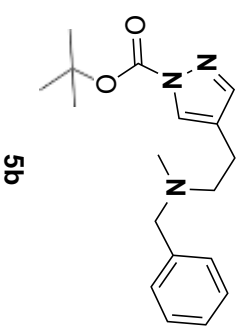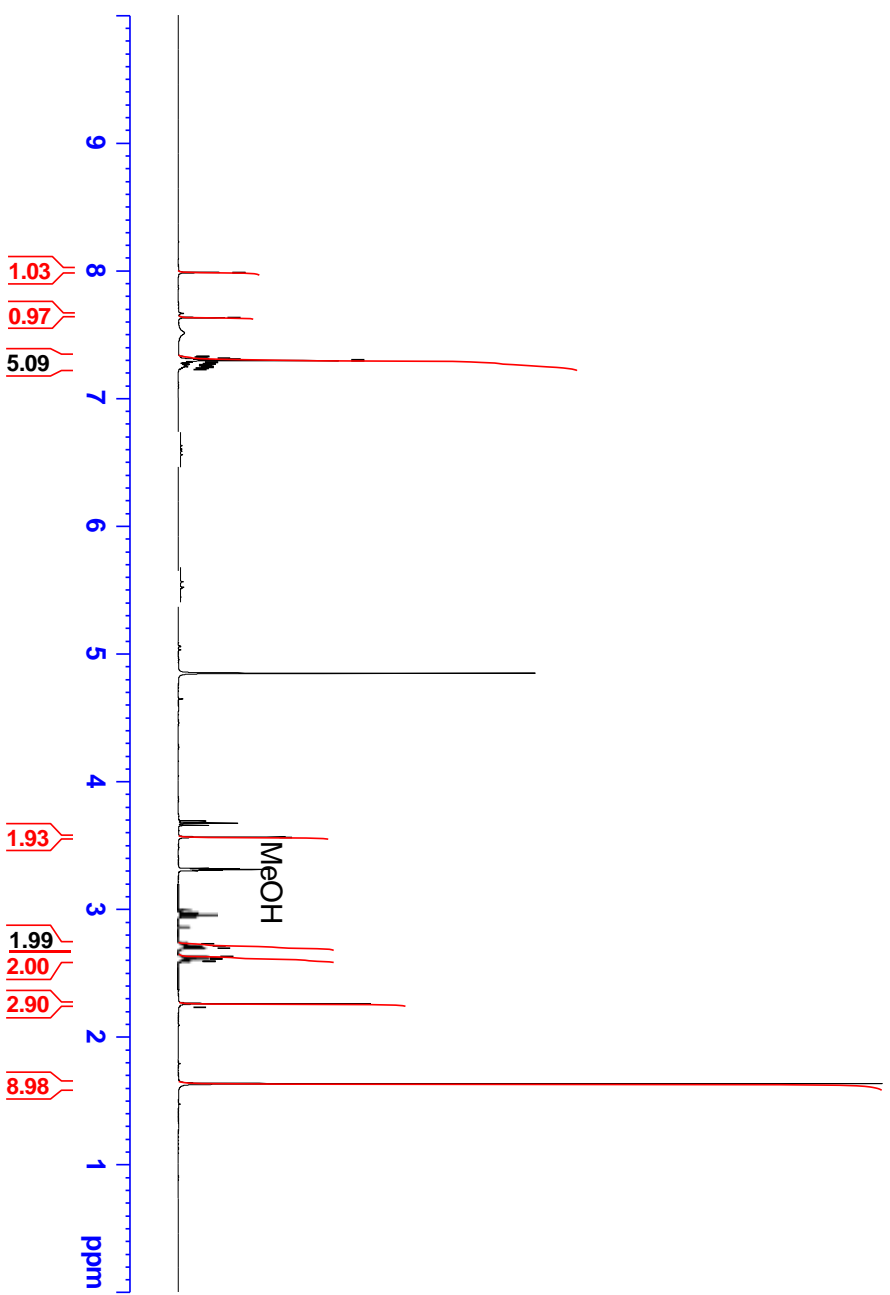



# Analysis Report

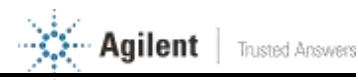

## Sample Information

|                       |              |                           |                                                                      |
|-----------------------|--------------|---------------------------|----------------------------------------------------------------------|
| <b>Name</b>           | 22-38        | <b>Data File Path</b>     | D:\MassHunter\Data\Louise\22-38-hplc.d                               |
| <b>Sample ID</b>      |              | <b>Acq. Time (Local)</b>  | 1/10/2024 6:01:49 PM (UTC-06:00)                                     |
| <b>Instrument</b>     | Instrument 1 | <b>Method Path (Acq)</b>  | D:\MassHunter\Methods\SR\Shafikur_HPLC method\Shafikur_HPLC method.m |
| <b>MS Type</b>        | TOF          | <b>Version (Acq SW)</b>   | 6200 series TOF/6500 series Q-TOF 10.1 (48.0)                        |
| <b>Inj. Vol. (ul)</b> | 10           | <b>IRM Status</b>         | All ions missed                                                      |
| <b>Position</b>       | P1-A2        | <b>Method Path (DA)</b>   |                                                                      |
| <b>Plate Pos.</b>     |              | <b>Target Source Path</b> |                                                                      |
| <b>Operator</b>       |              | <b>Result Summary</b>     |                                                                      |

## Sample Chromatograms

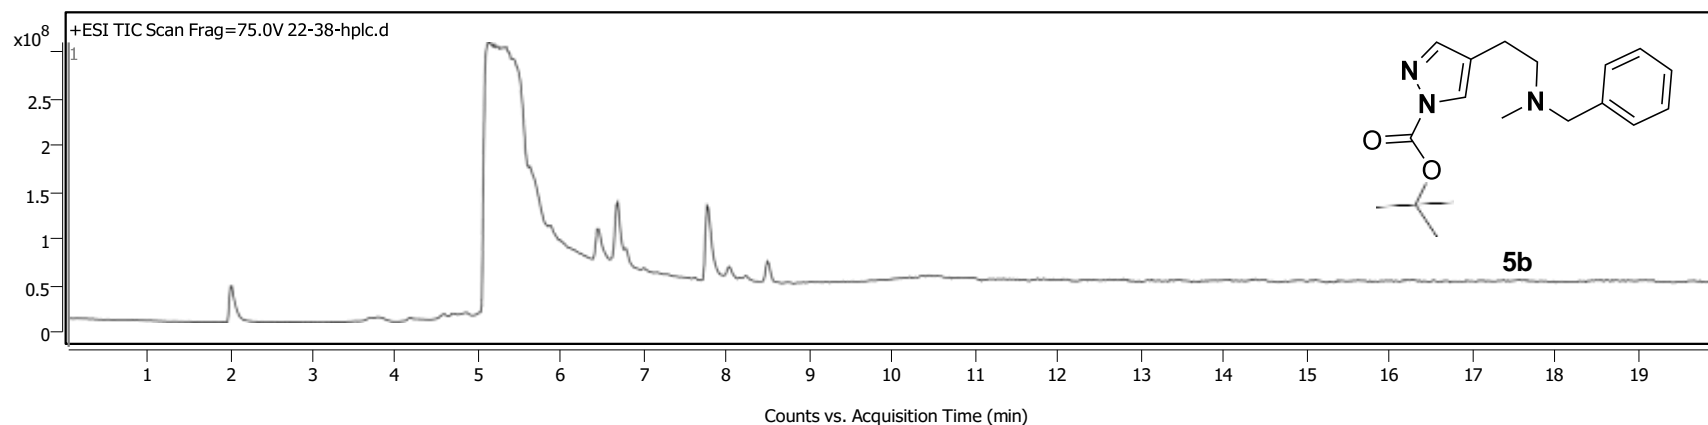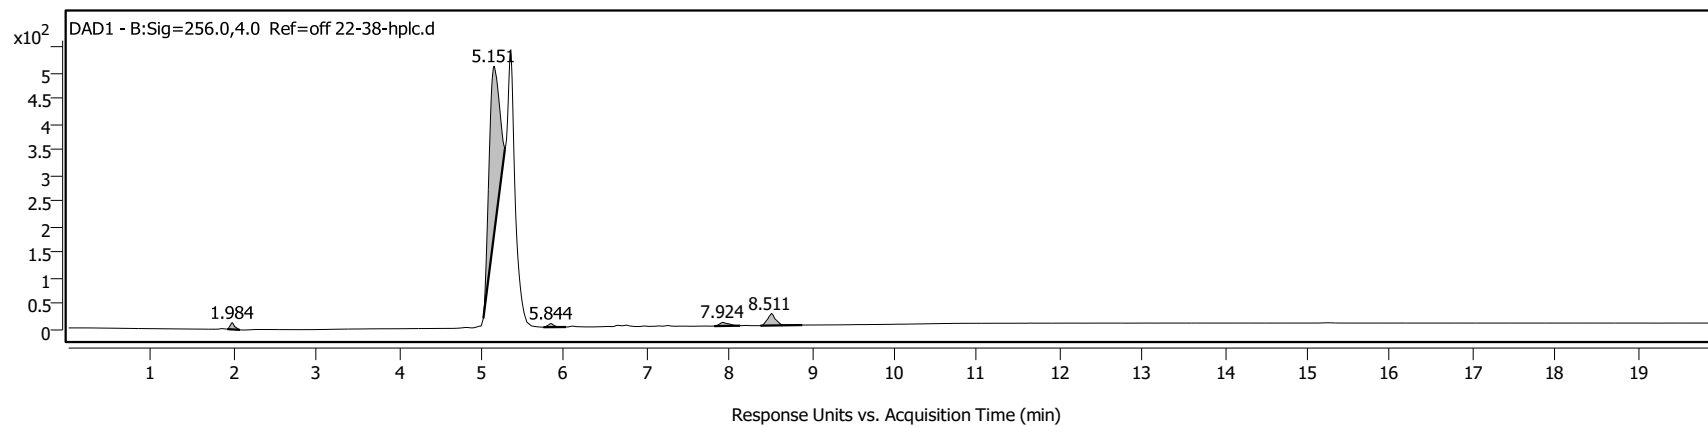

# User Spectrum Plot Report

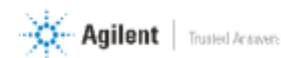

|                |              |              |                        |            |                 |                   |                      |
|----------------|--------------|--------------|------------------------|------------|-----------------|-------------------|----------------------|
| Name           | 22-38        | Rack Pos.    |                        | Instrument | Instrument 1    | Operator          |                      |
| Inj. Vol. (ul) | 10           | Plate Pos.   |                        | IRM Status | All ions missed | Acq. Time (Local) | 1/10/2024 6:01:49 PM |
| Data File      | 22-38-hplc.d | Method (Acq) | Shafikur_HPLC method.m | Comment    |                 | (UTC-06:00)       |                      |

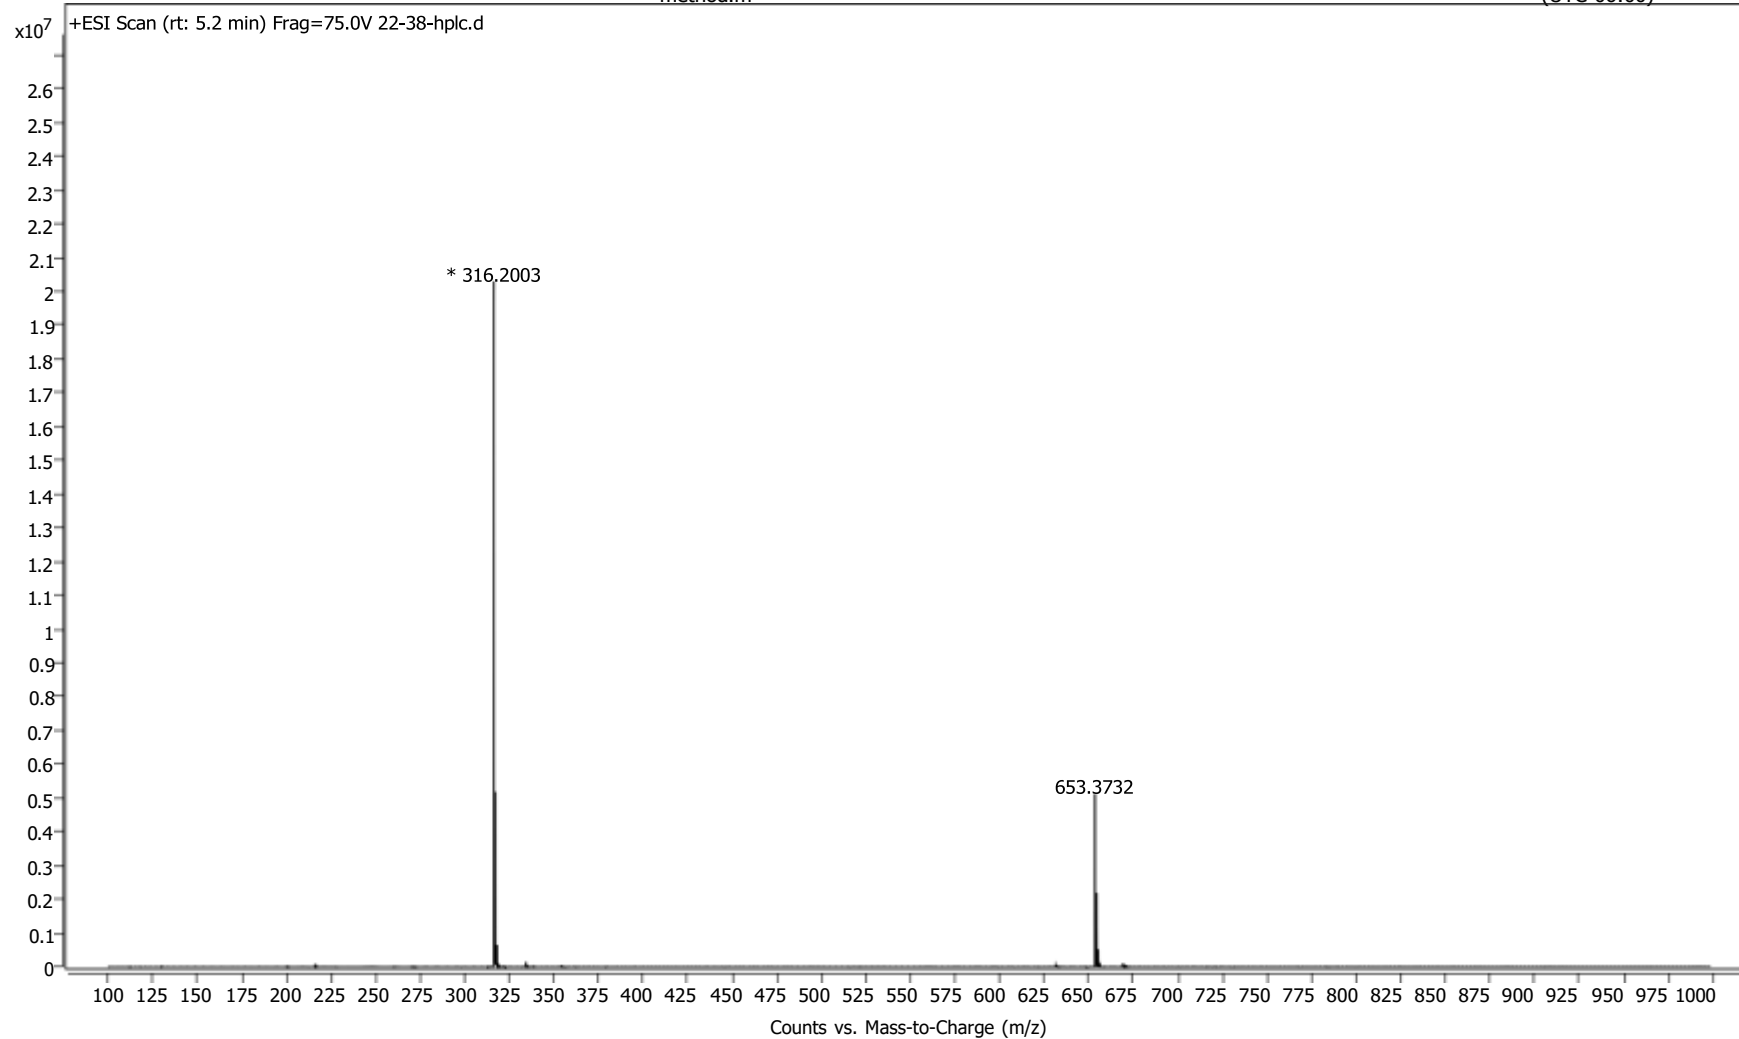

2-(1-benzyl-1H-pyrazol-4-yl)ethan-1-ol

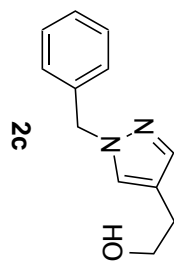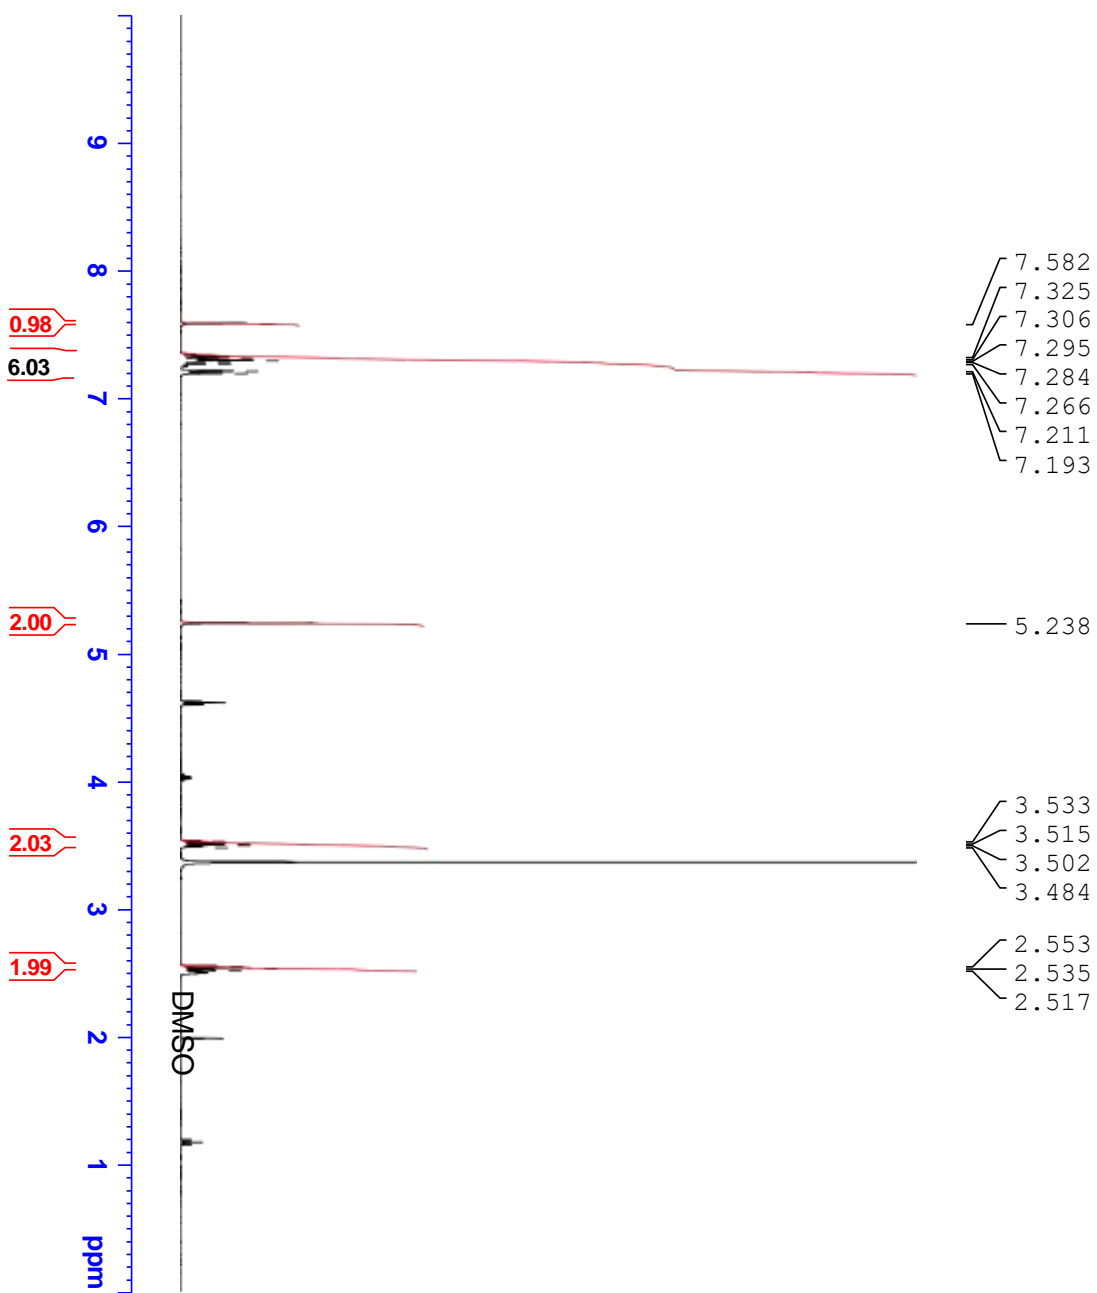

2-(1-benzyl)-1H-pyrazol-4-yl) ethan-1-ol

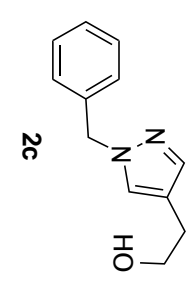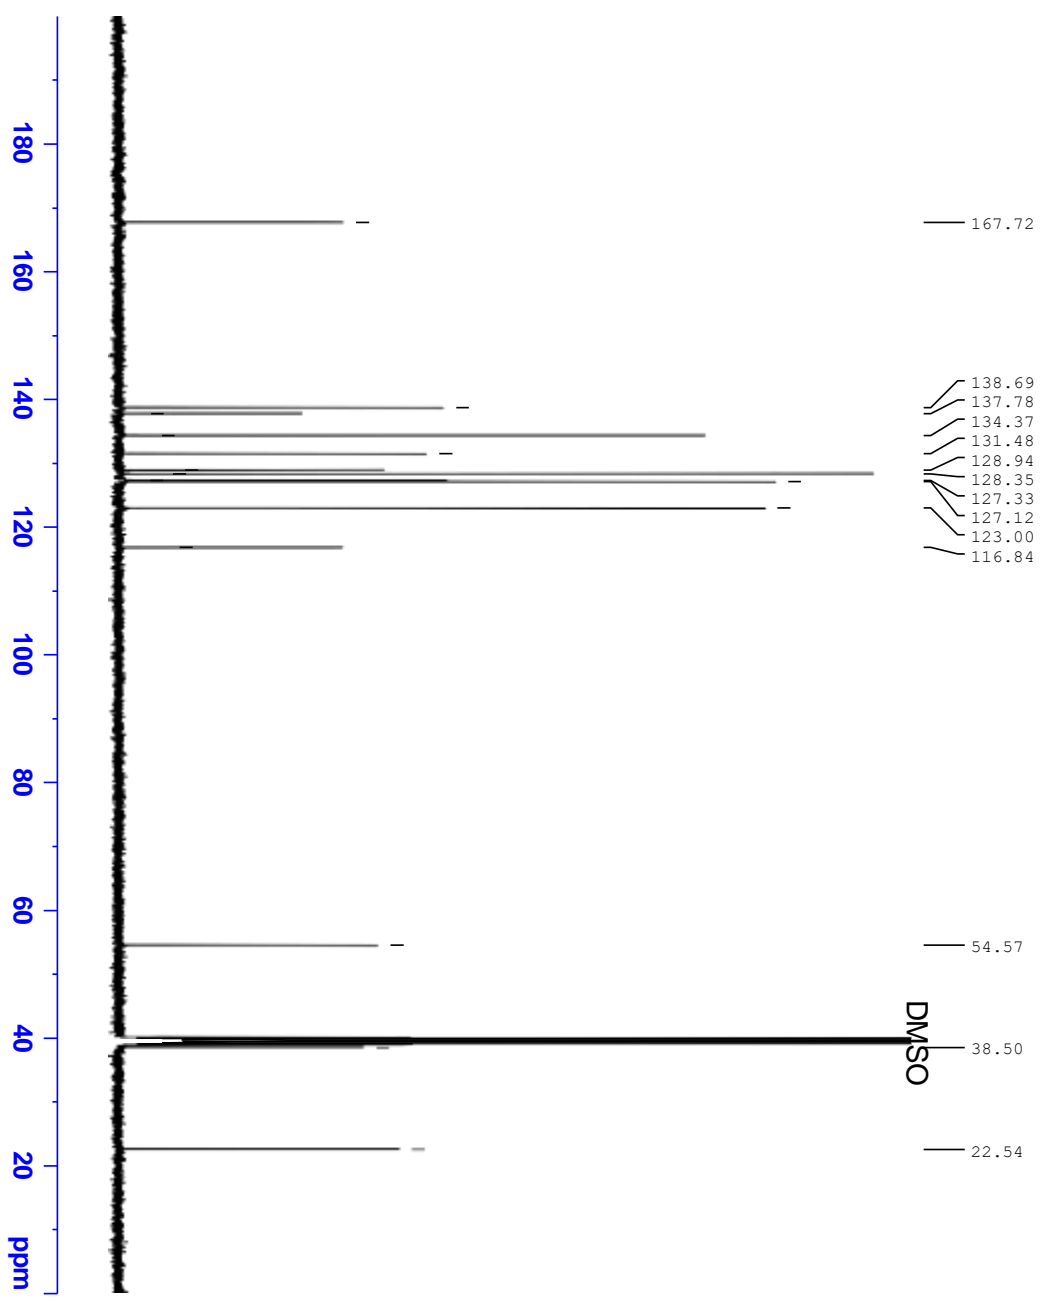

1-benzyl-4-(2-chloroethyl)-1H-pyrazole

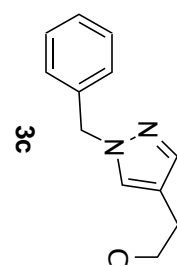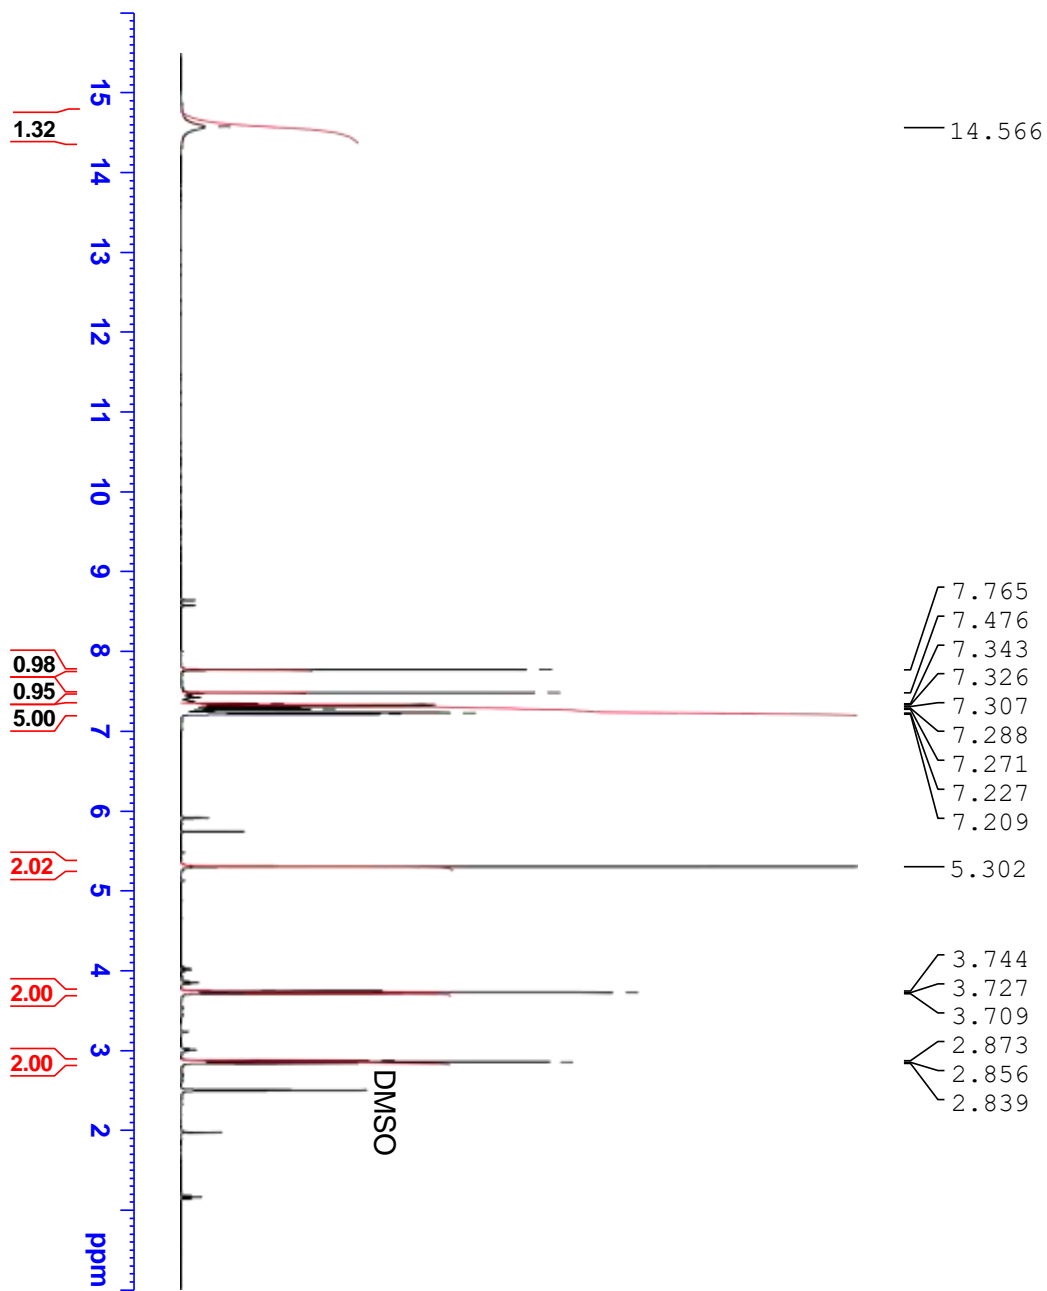

2-(2-(1-benzyl-1H-pyrazol-4-yl)ethyl)isoindolin-1,3-dione

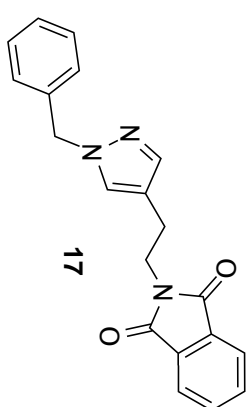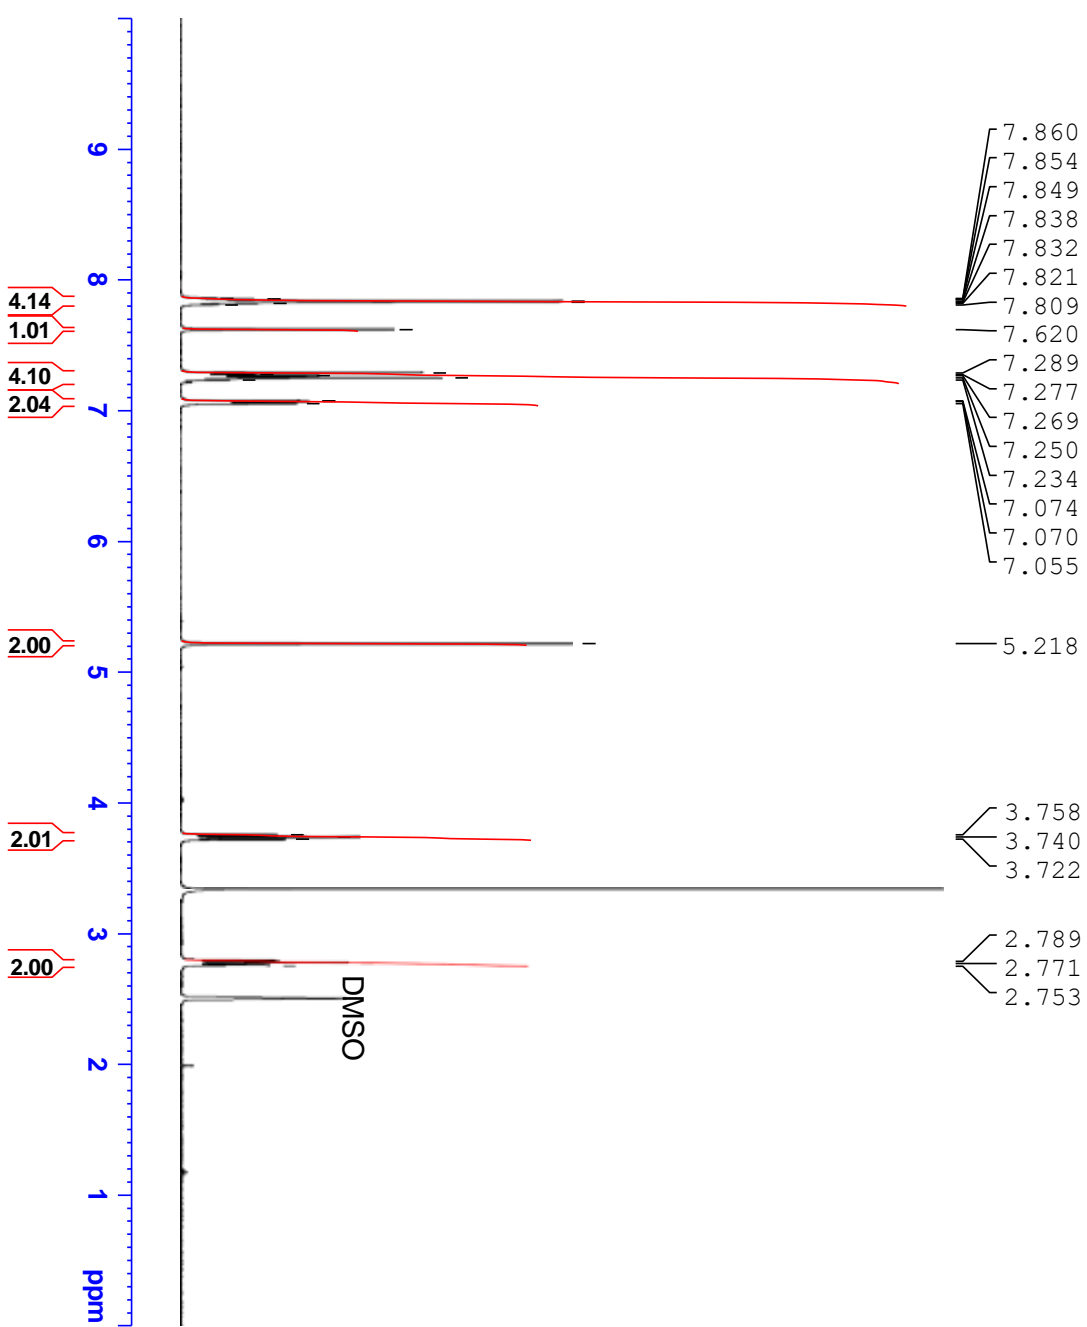

2-(2-(1-benzyl-1H-pyrazol-4-yl)ethyl)isindoline-1,3-dione

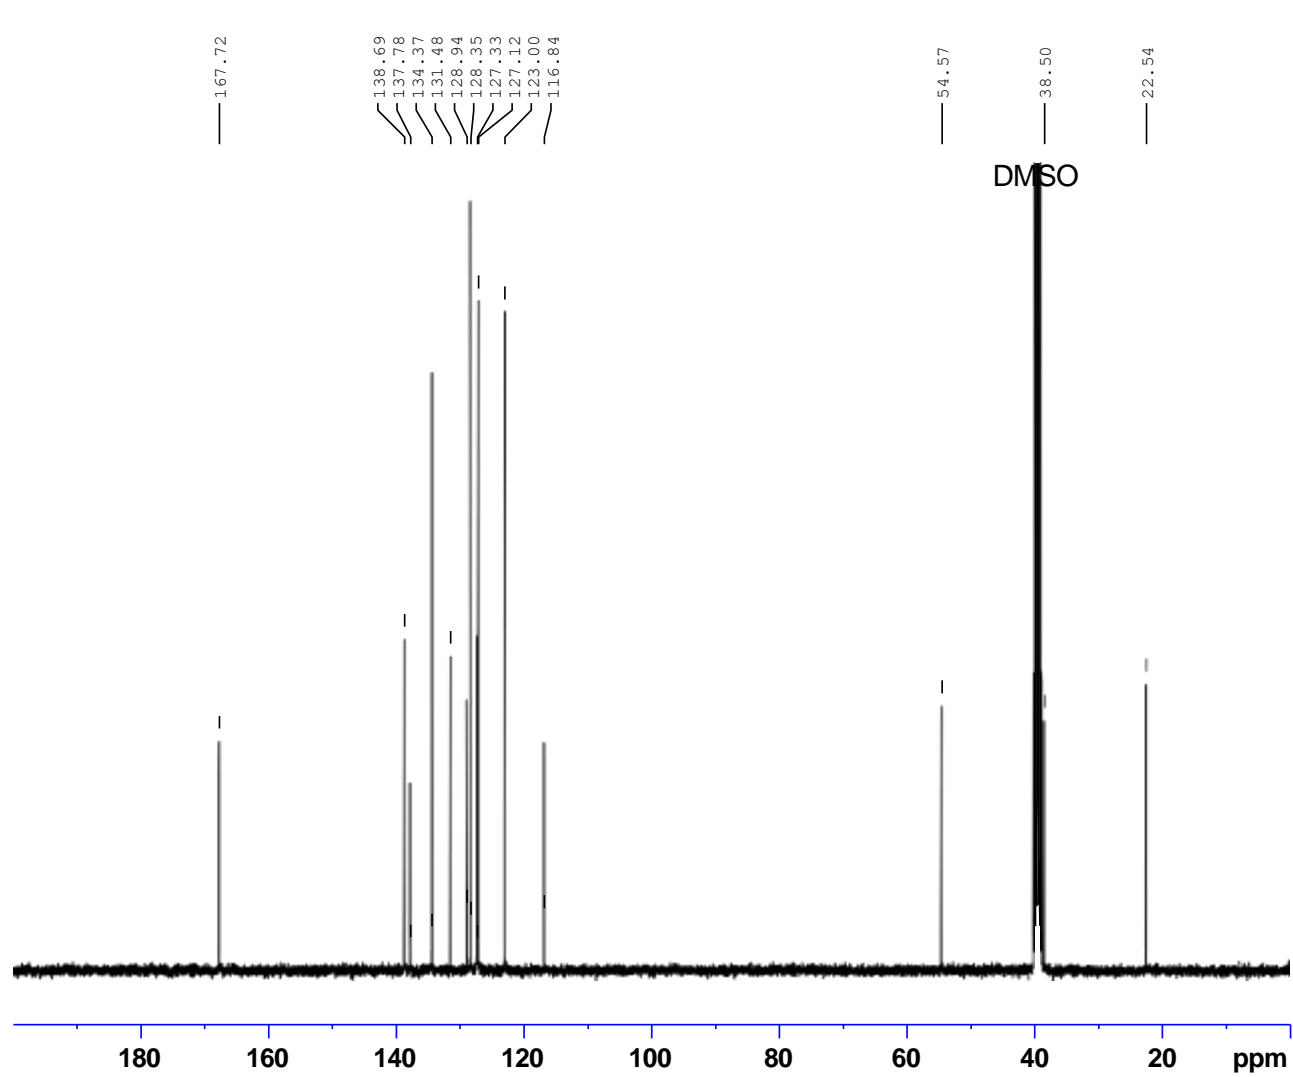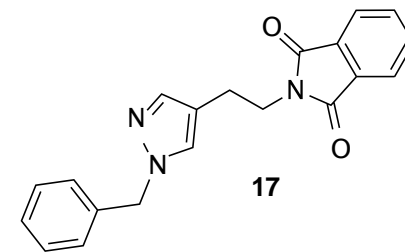

2-(1-benzyl-1H-pyrazol-4-yl)ethan-1-amine

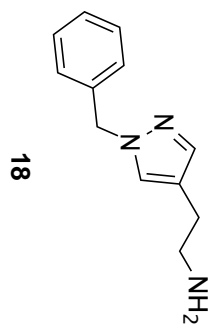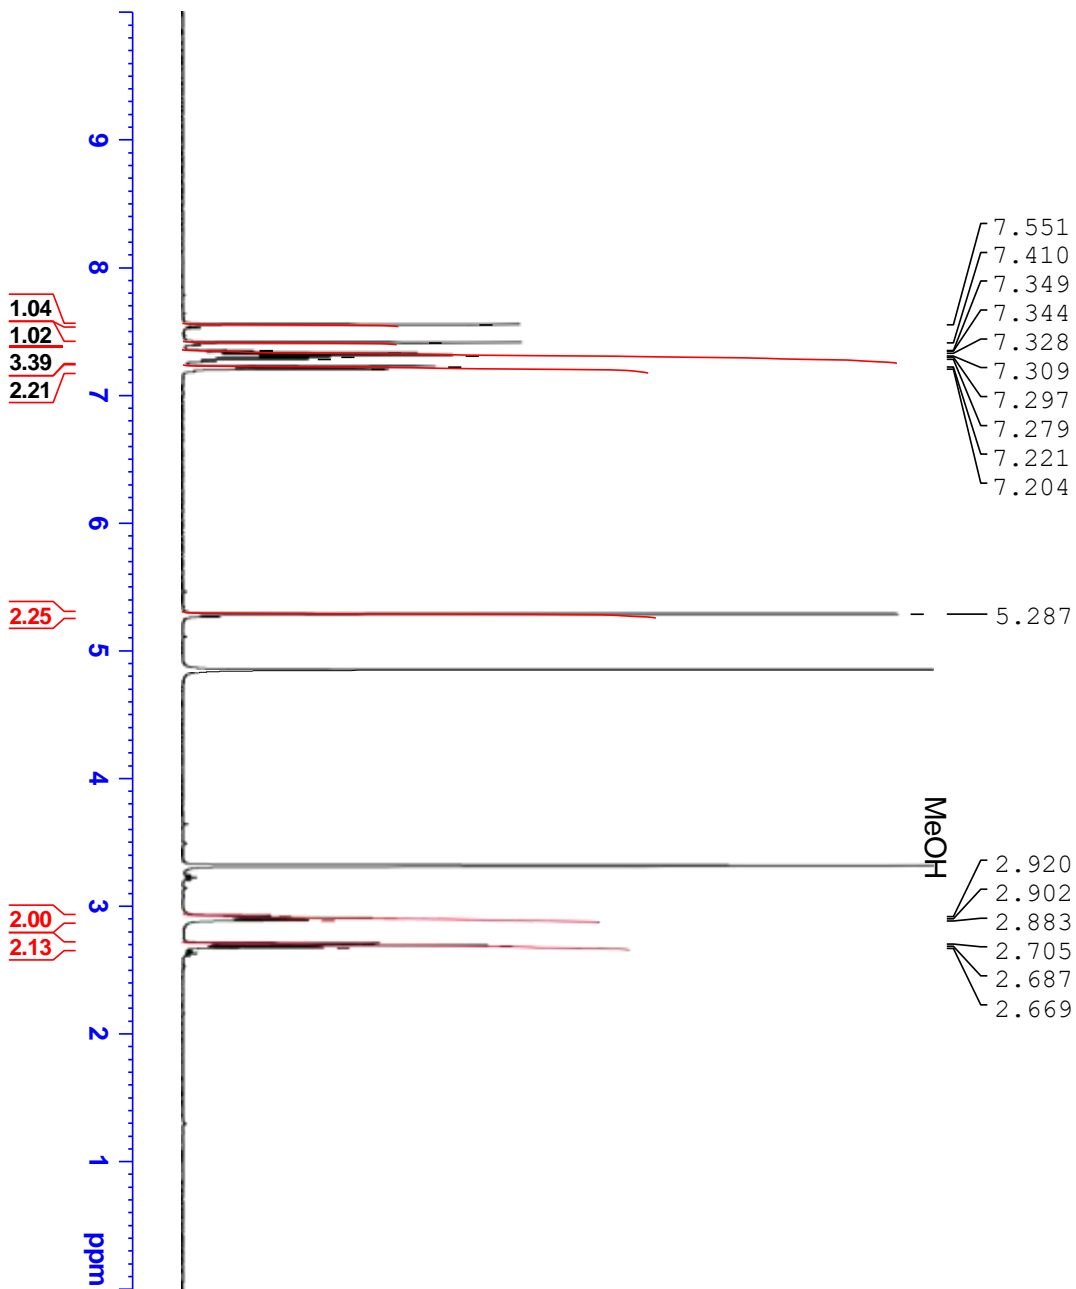



2-(1-benzyl-1H-pyrazol-4-yl)ethan-1-amine

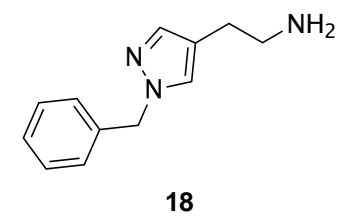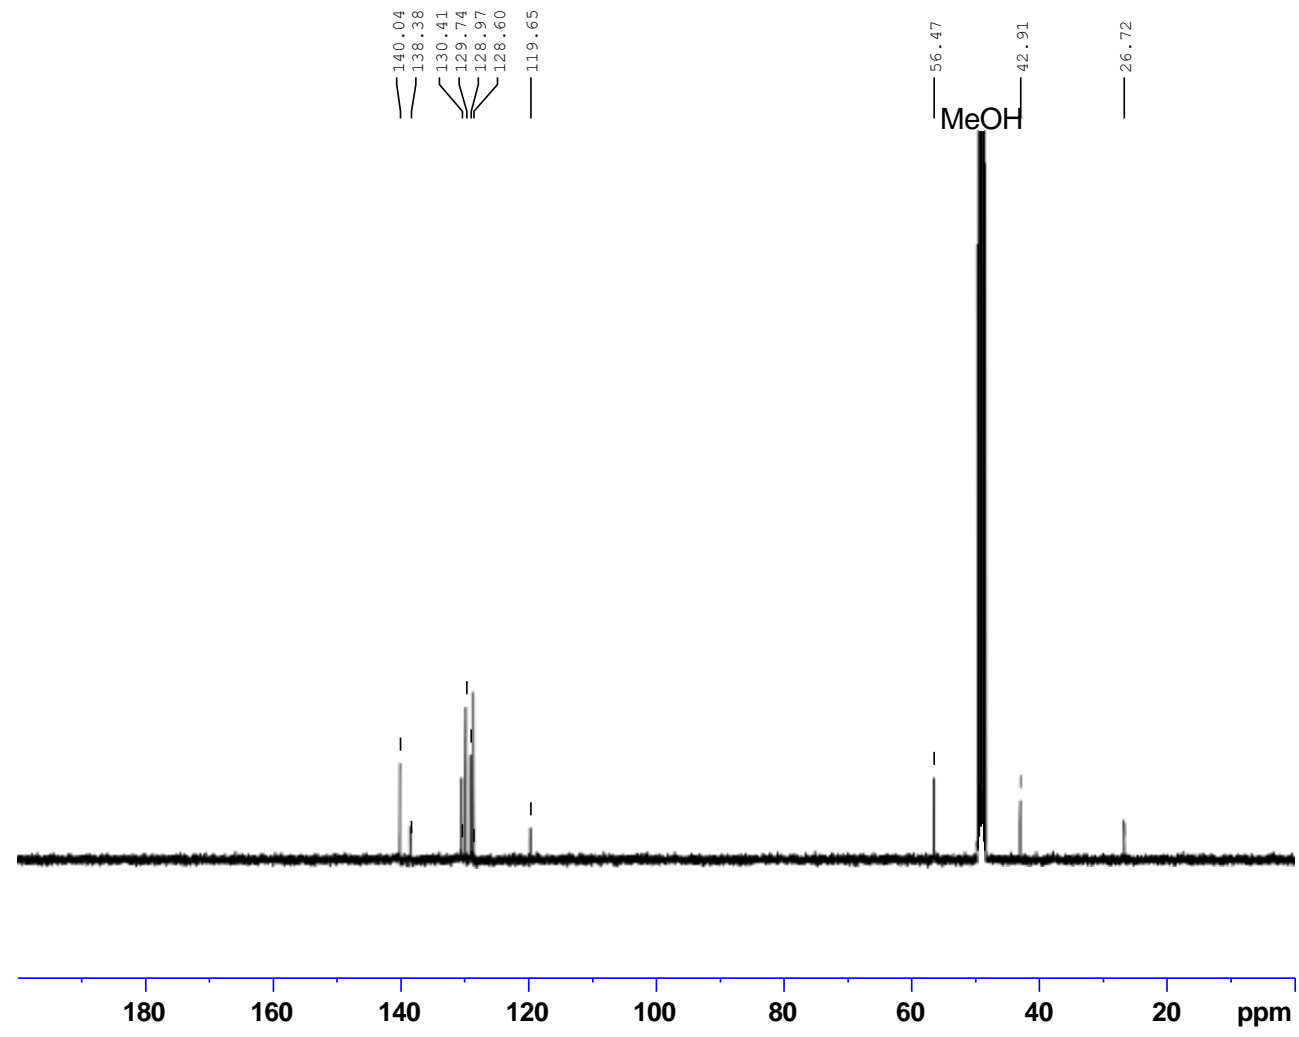

N-benzyl-2-(1-benzyl-1H-pyrazol-4-yl)ethan-1-amine

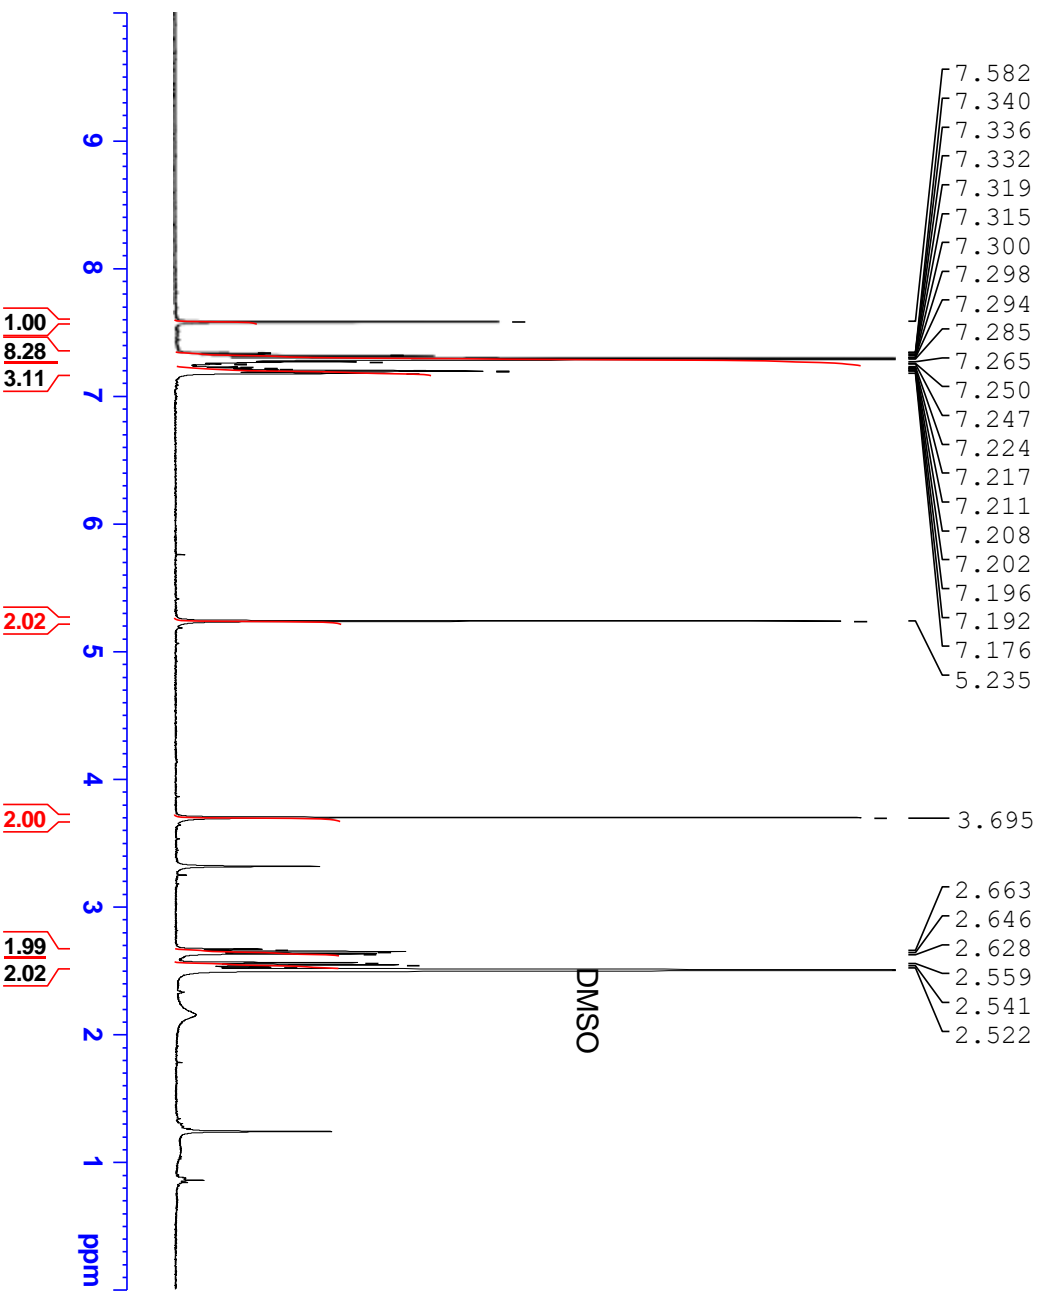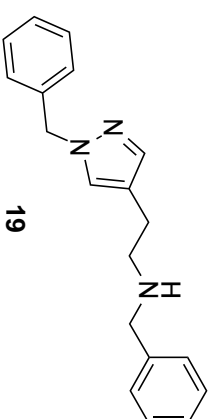

# User Spectrum Plot Report

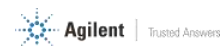

|                |                |              |            |                                   |
|----------------|----------------|--------------|------------|-----------------------------------|
| Name           |                | Rack Pos.    | Instrument | Operator                          |
| Inj. Vol. (ul) |                | Plate Pos.   | IRM Status | Success                           |
| Data File      | Id-001-139-1.d | Method (Acq) | Comment    | Acq. Time (Local)                 |
|                |                |              |            | 10/31/2024 2:54:12 PM (UTC-05:00) |

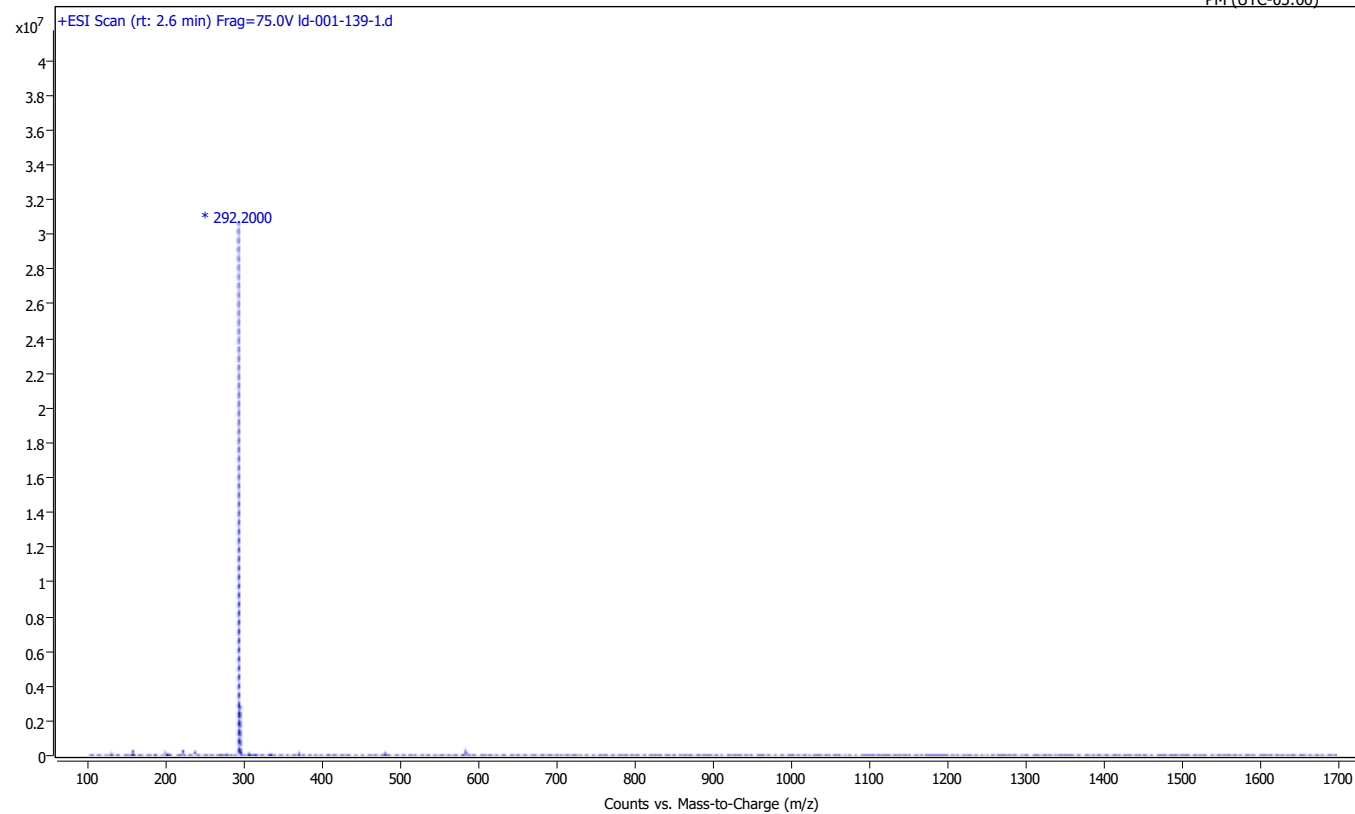

2-(1-benzyl-1H-pyrazol-4-yl)-N-methylethan-1-amine

7.589  
7.339  
7.324  
7.309  
7.291  
7.282  
7.267  
7.253  
7.203  
7.188

5.239

2.614  
2.600  
2.585  
2.515  
2.500  
2.272

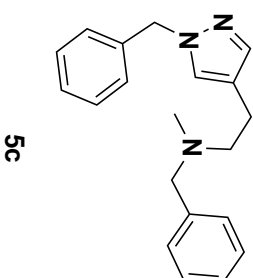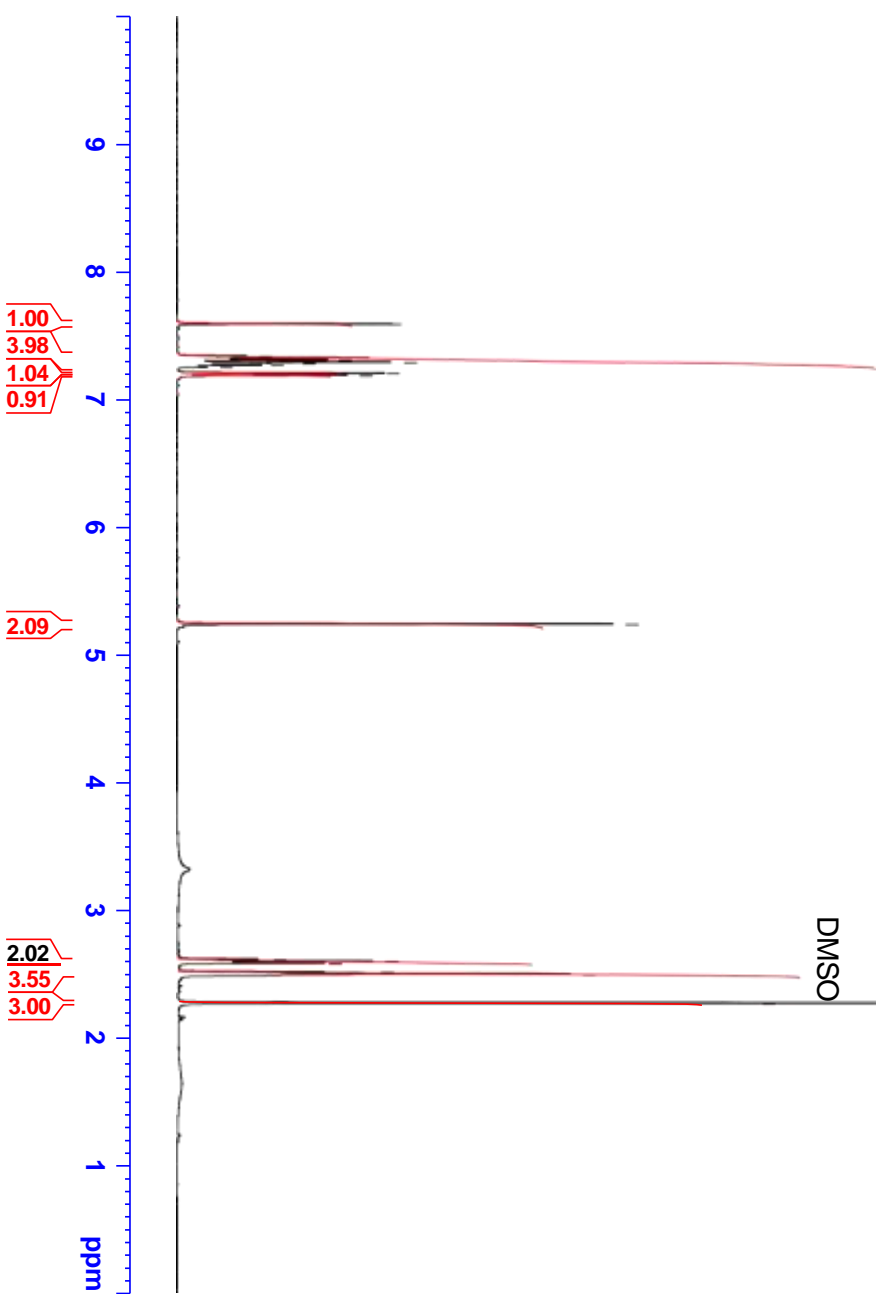

# Analysis Report

## Sample Information

|                       |              |                           |                                                 |
|-----------------------|--------------|---------------------------|-------------------------------------------------|
| <b>Name</b>           | LD-001-145   | <b>Data File Path</b>     | D:\MassHunter\Data\Louise\LD-001-145.d          |
| <b>Sample ID</b>      |              | <b>Acq. Time (Local)</b>  | 6/30/2023 2:57:30 PM (UTC-05:00)                |
| <b>Instrument</b>     | Instrument 1 | <b>Method Path (Acq)</b>  | D:\MassHunter\Methods\SR\Shafikur_HRMS method.m |
| <b>MS Type</b>        | TOF          | <b>Version (Acq SW)</b>   | 6200 series TOF/6500 series Q-TOF 10.1 (48.0)   |
| <b>Inj. Vol. (ul)</b> | 2            | <b>IRM Status</b>         | Success                                         |
| <b>Position</b>       | P1-A7        | <b>Method Path (DA)</b>   |                                                 |
| <b>Plate Pos.</b>     |              | <b>Target Source Path</b> |                                                 |
| <b>Operator</b>       |              | <b>Result Summary</b>     |                                                 |

## Sample Chromatograms

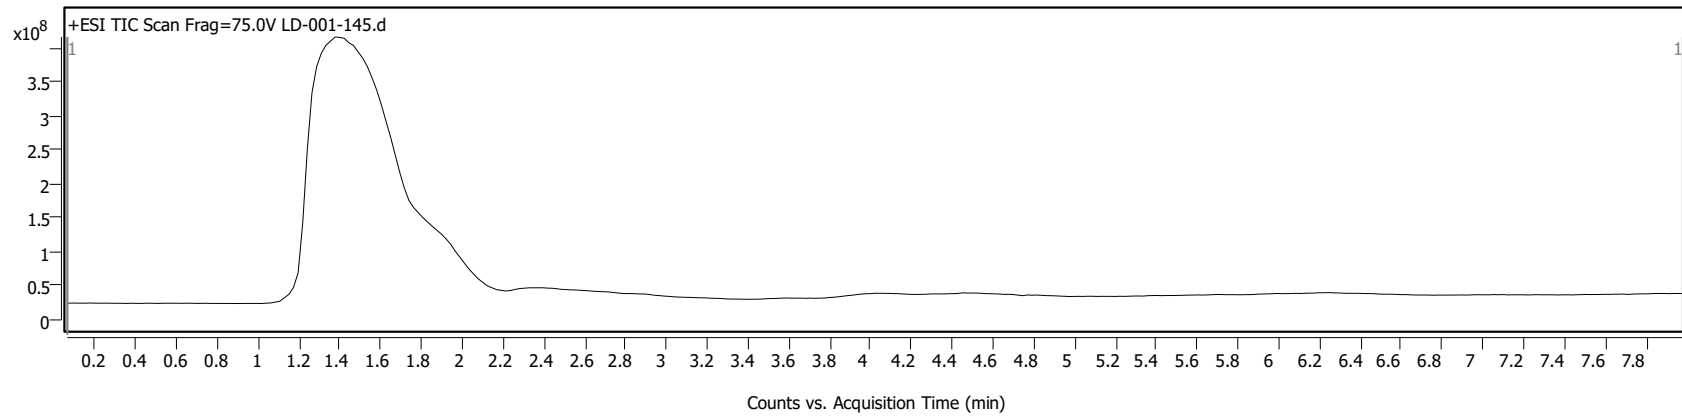

MassHunter Qual 10.0  
(End of Report)

# User Spectrum Plot Report

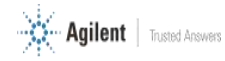

|                |              |              |                           |            |              |                   |                                     |
|----------------|--------------|--------------|---------------------------|------------|--------------|-------------------|-------------------------------------|
| Name           | LD-001-145   | Rack Pos.    |                           | Instrument | Instrument 1 | Operator          |                                     |
| Inj. Vol. (ul) | 2            | Plate Pos.   |                           | IRM Status | Success      |                   |                                     |
| Data File      | LD-001-145.d | Method (Acq) | Shafikur_HRMS<br>method.m | Comment    |              | Acq. Time (Local) | 6/30/2023 2:57:30 PM<br>(UTC-05:00) |

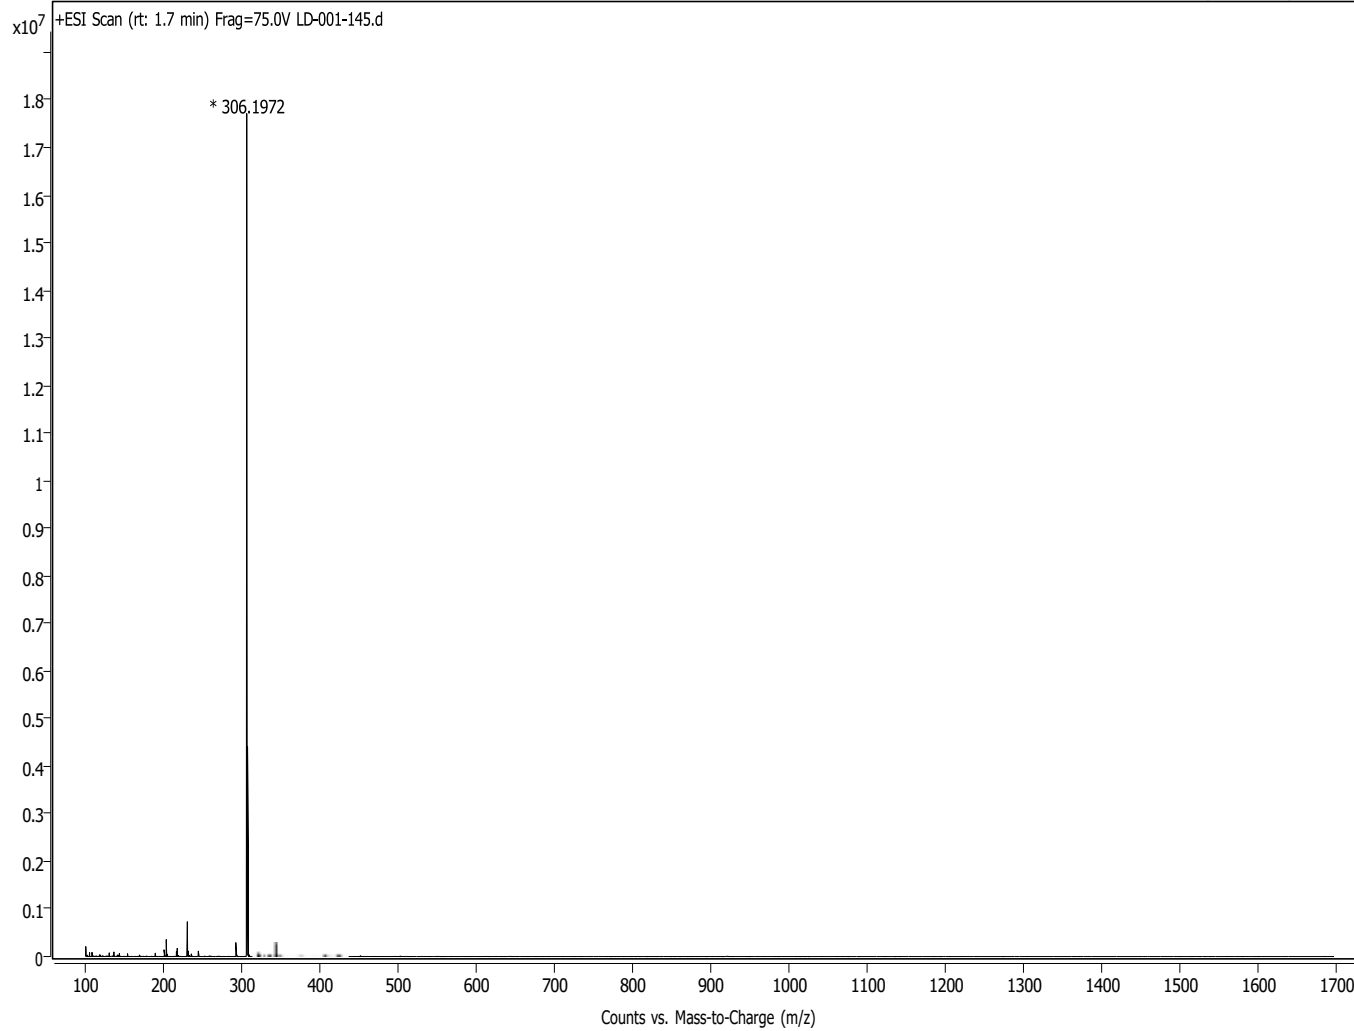

2-(1-(4-methoxybenzyl)-1H-pyrazol-4-yl)ethan-1-ol

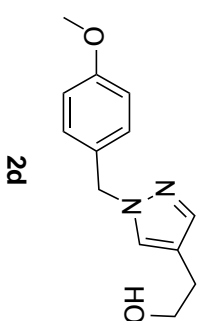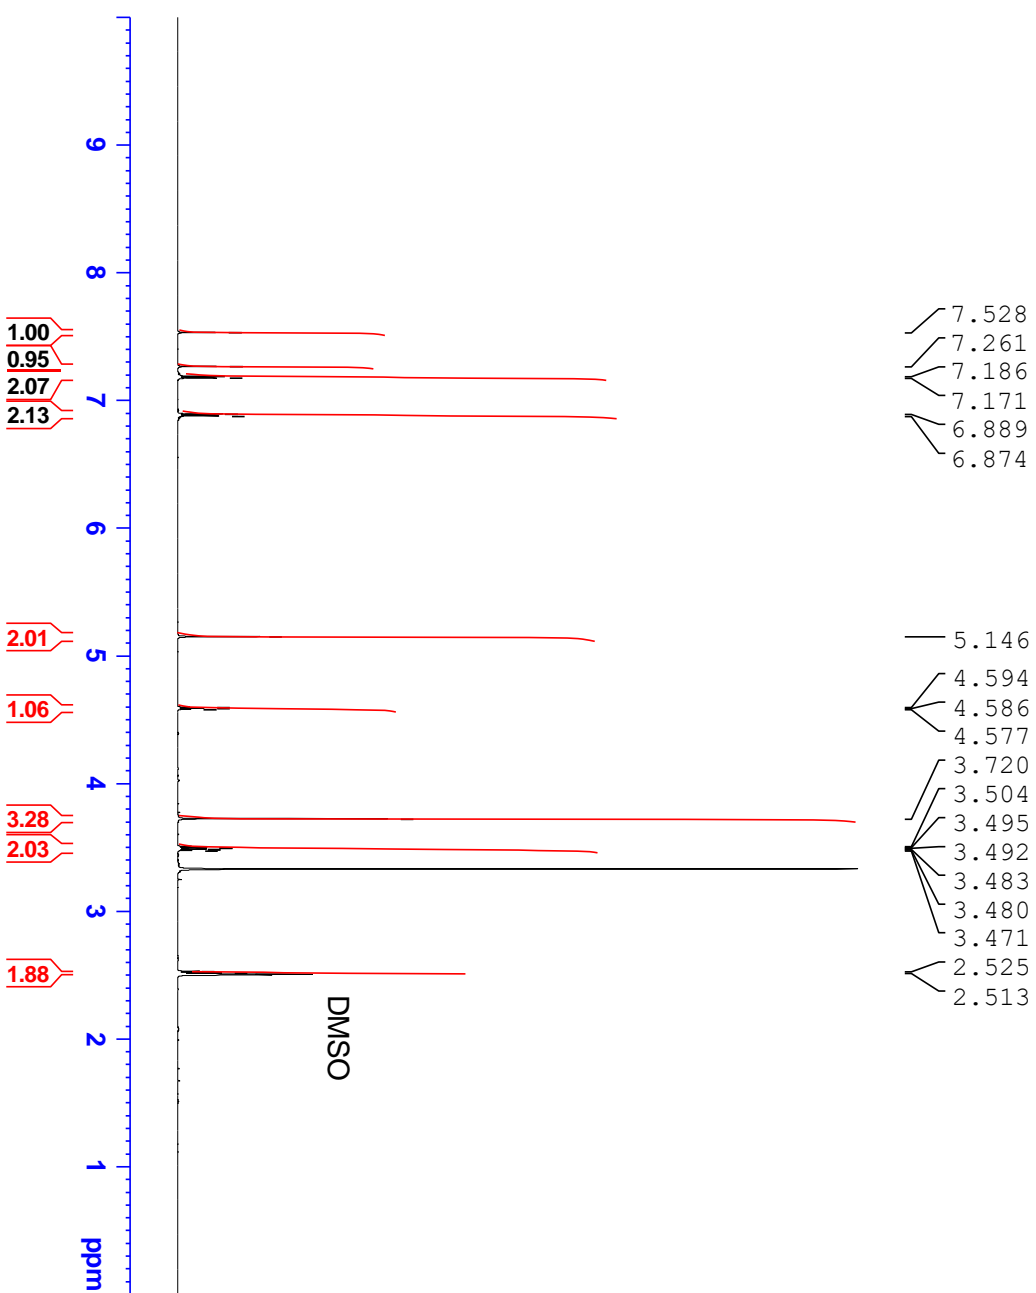

2-(1-(4-methoxybenzyl)-1H-pyrazol-4-yl)ethan-1-ol

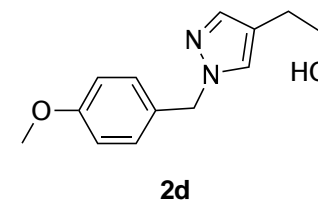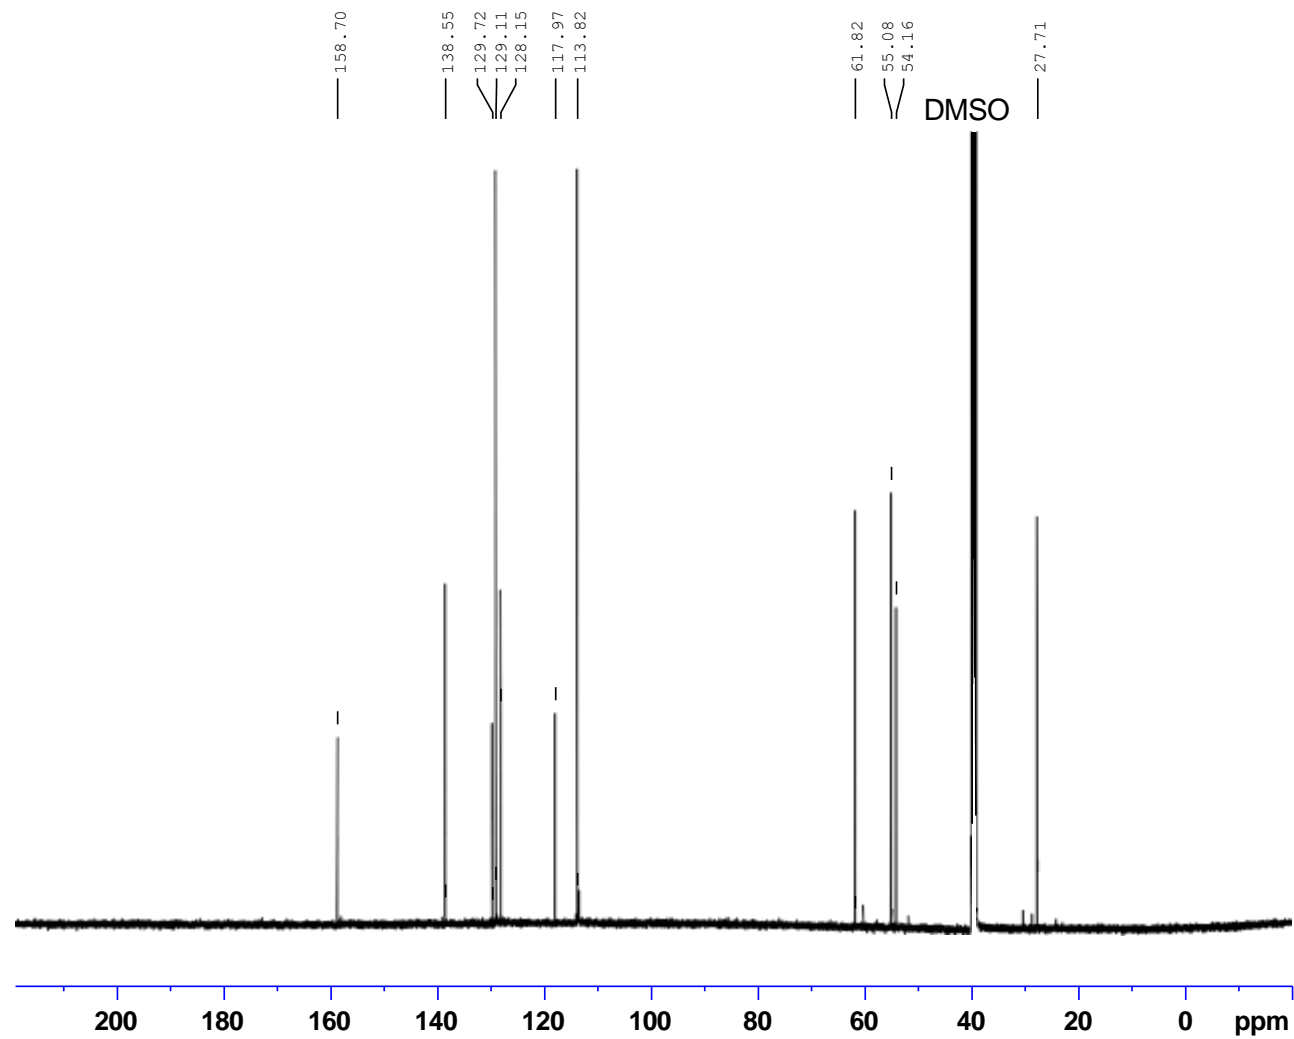



4-(2-Chloroethyl)-(1-(4-methoxybenzyl)-1H-pyrazole

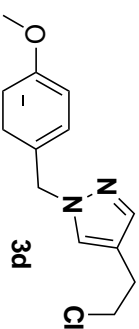

- 7.664
- 7.390
- 7.197
- 7.183
- 6.893
- 6.878
- 5.187
- 3.727
- 3.718
- 3.716
- 3.704
- 2.849
- 2.838
- 2.826

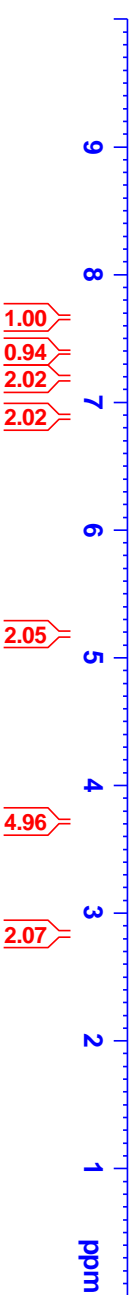

2-(2-(1-(4-methoxybenzyl)-1H-pyrazol-4-yl)ethyl)isoindoline-1,3-dione

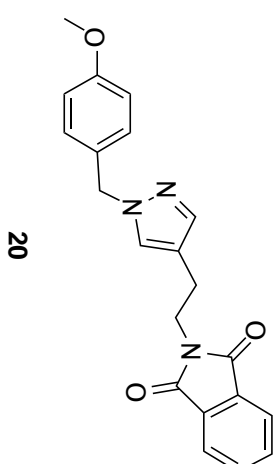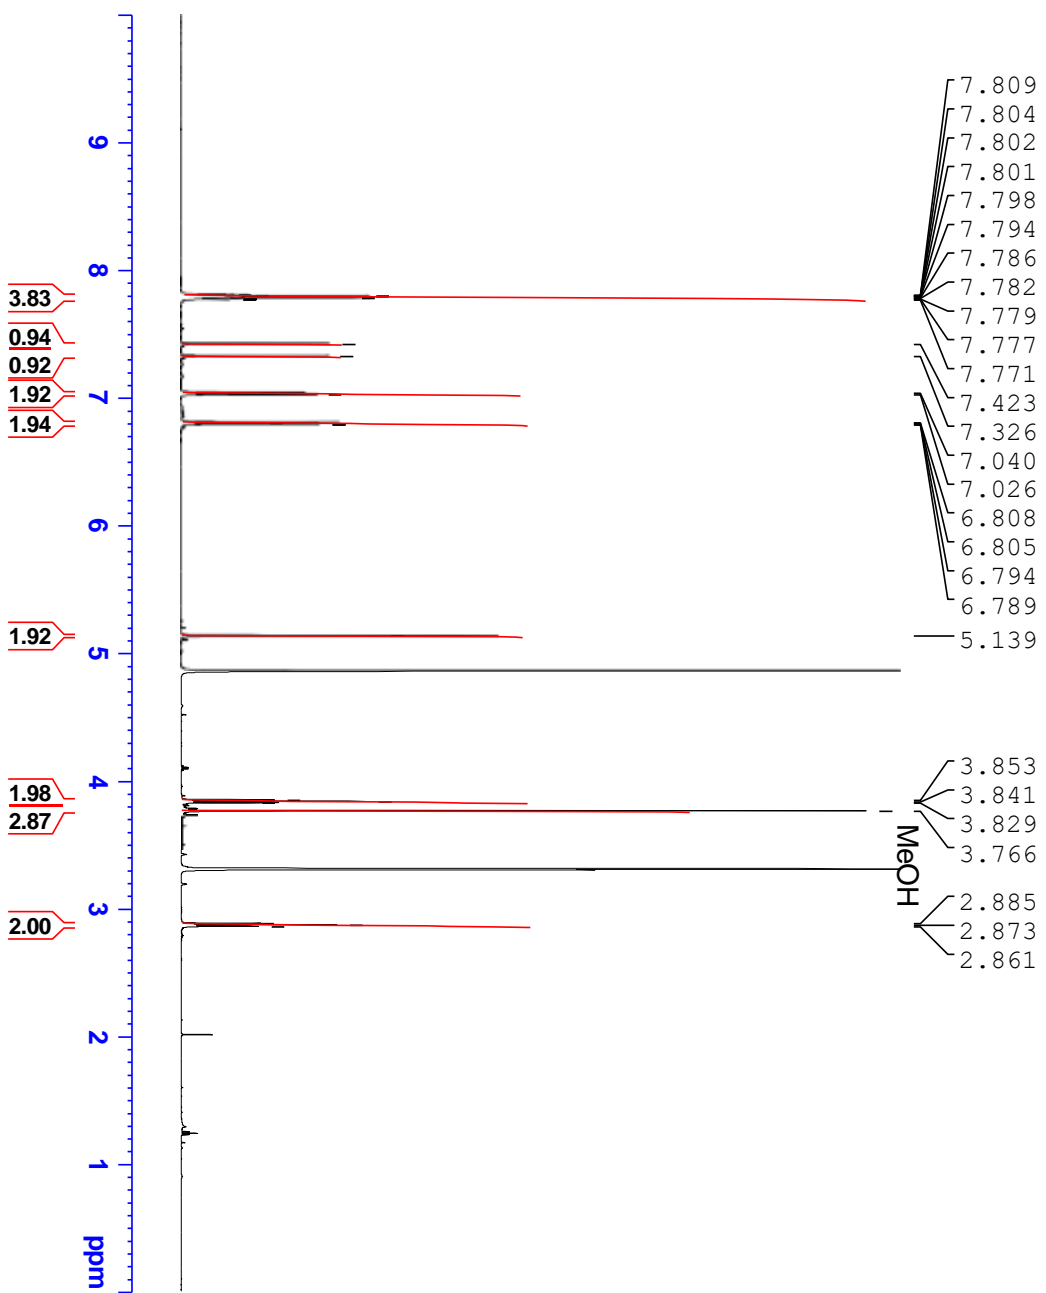

2-(2-(1-(4-methoxybenzyl)-1H-pyrazol-4-yl)ethyl)isoindoline-1,3-dione

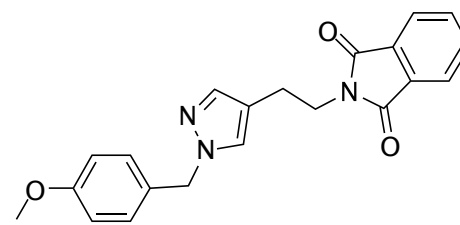

20

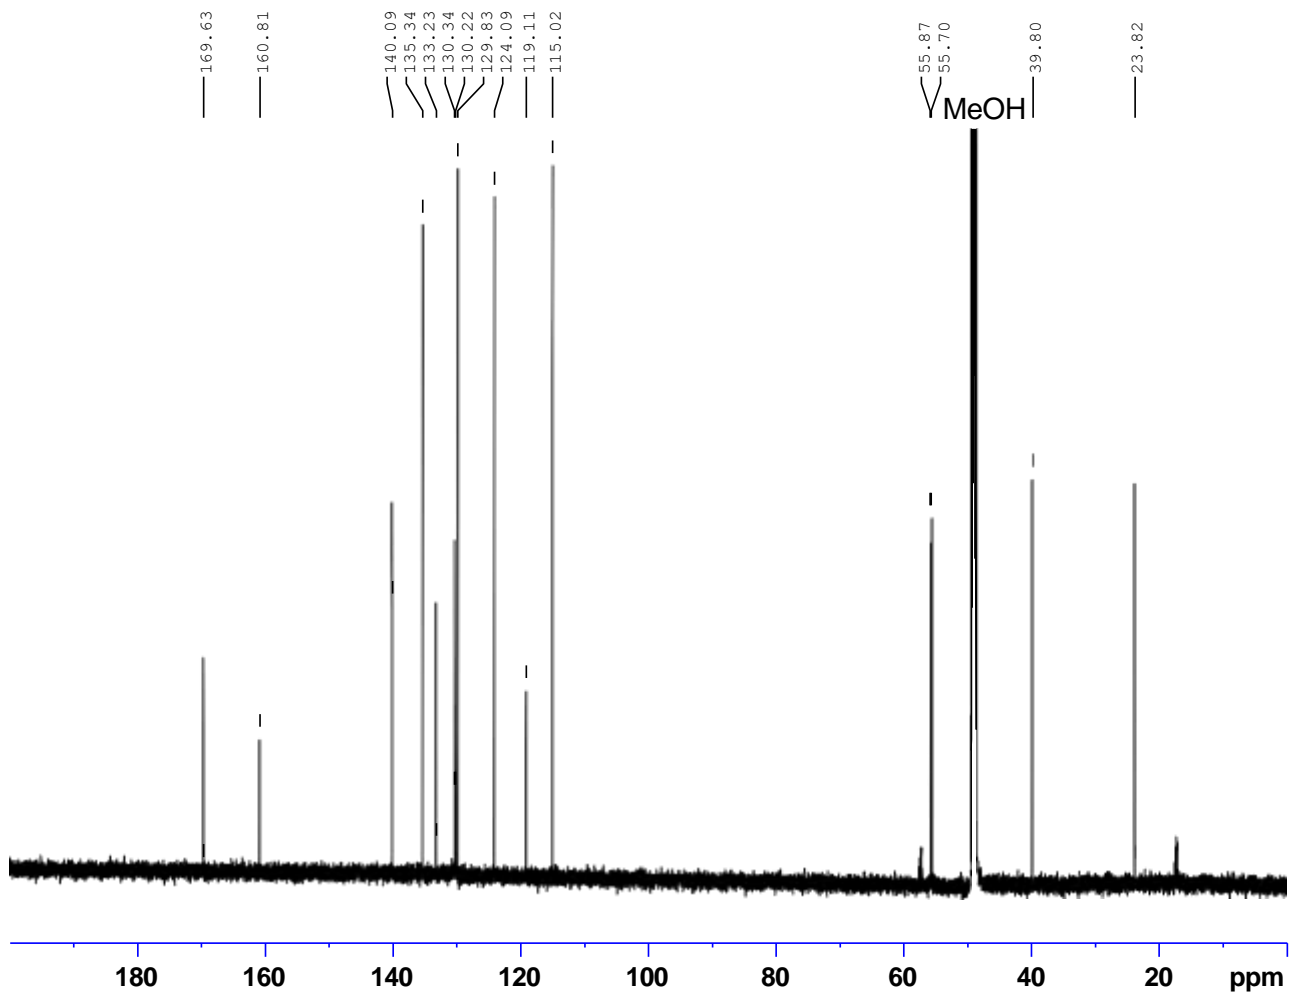

2-(1-(4-methoxybenzyl)-1H-pyrazol-4-yl)ethan-1-amine

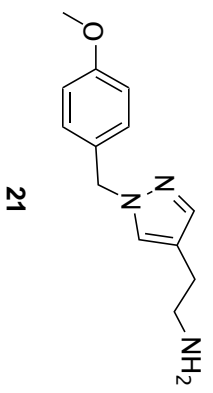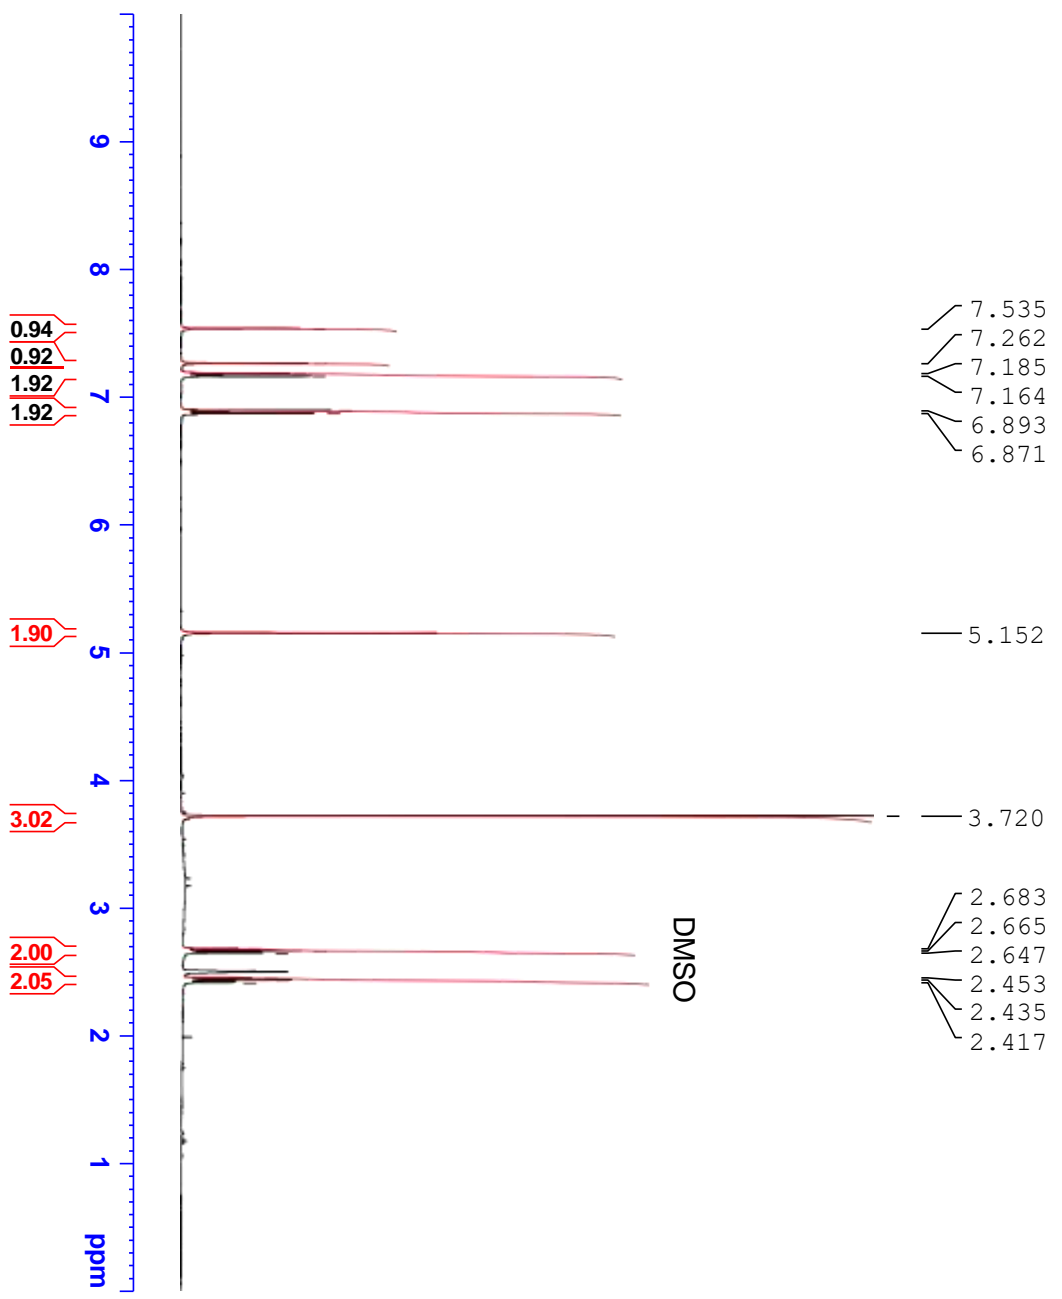

12 - (1 - (4-methoxybenzyl) -1H-pyrazol-4-yl) ethan-1-amine

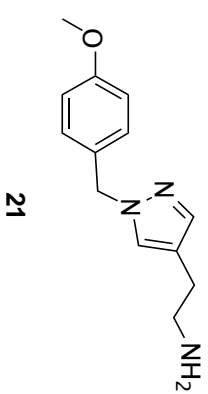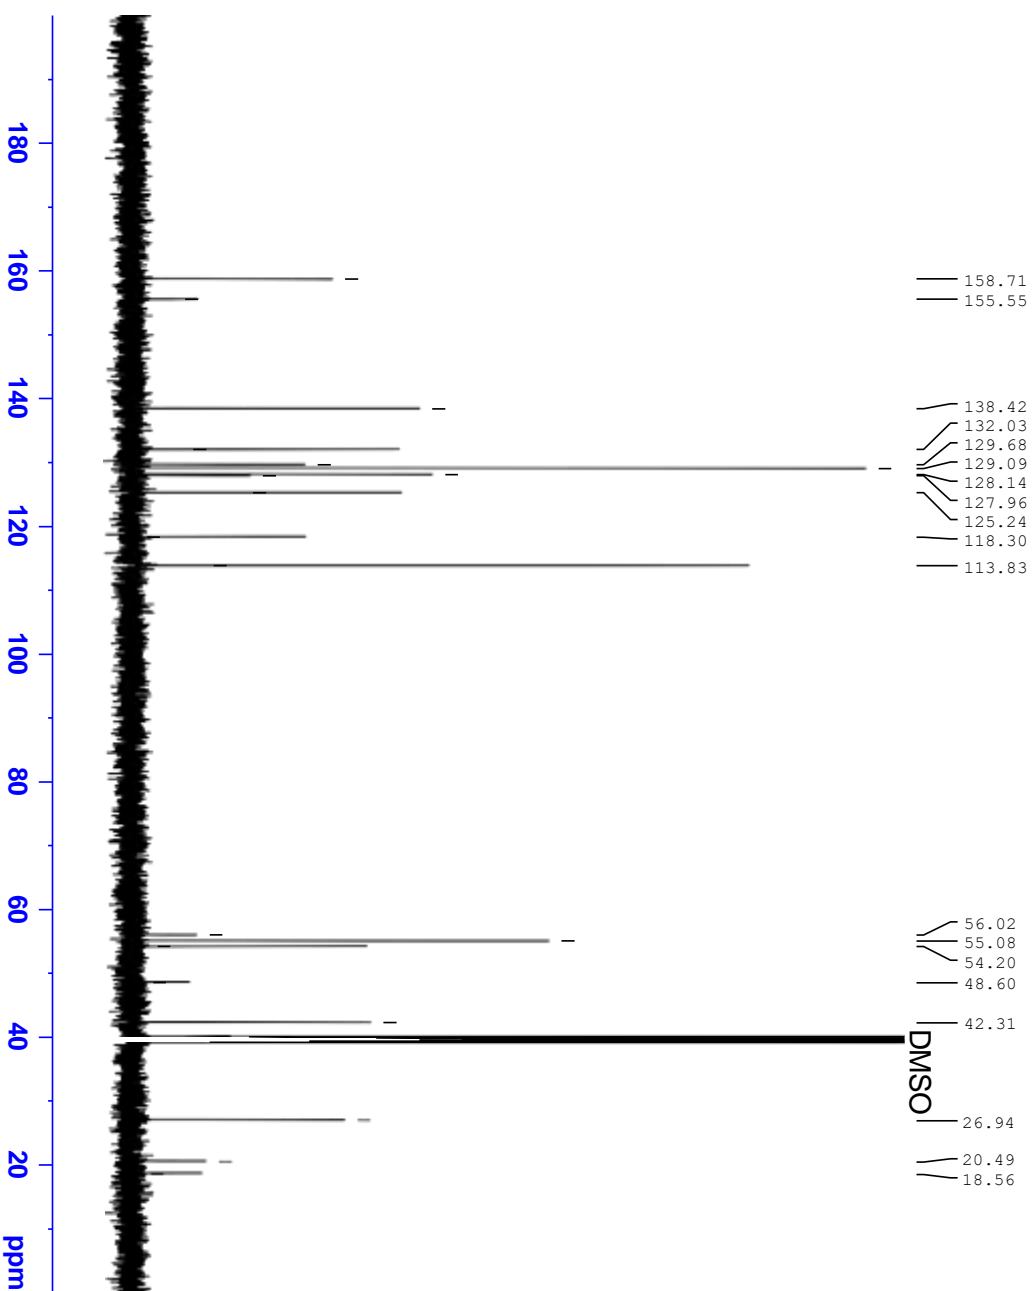

N-benzyl-2-(1-(4-methoxybenzyl)-1H-pyrazol-4-yl)ethan-1-amine

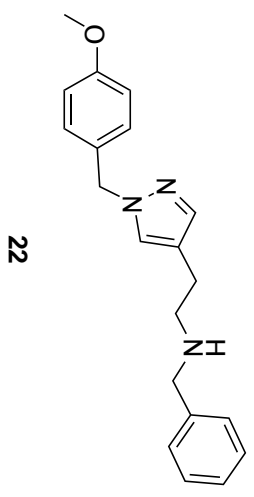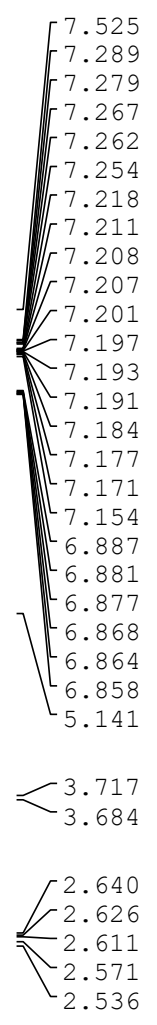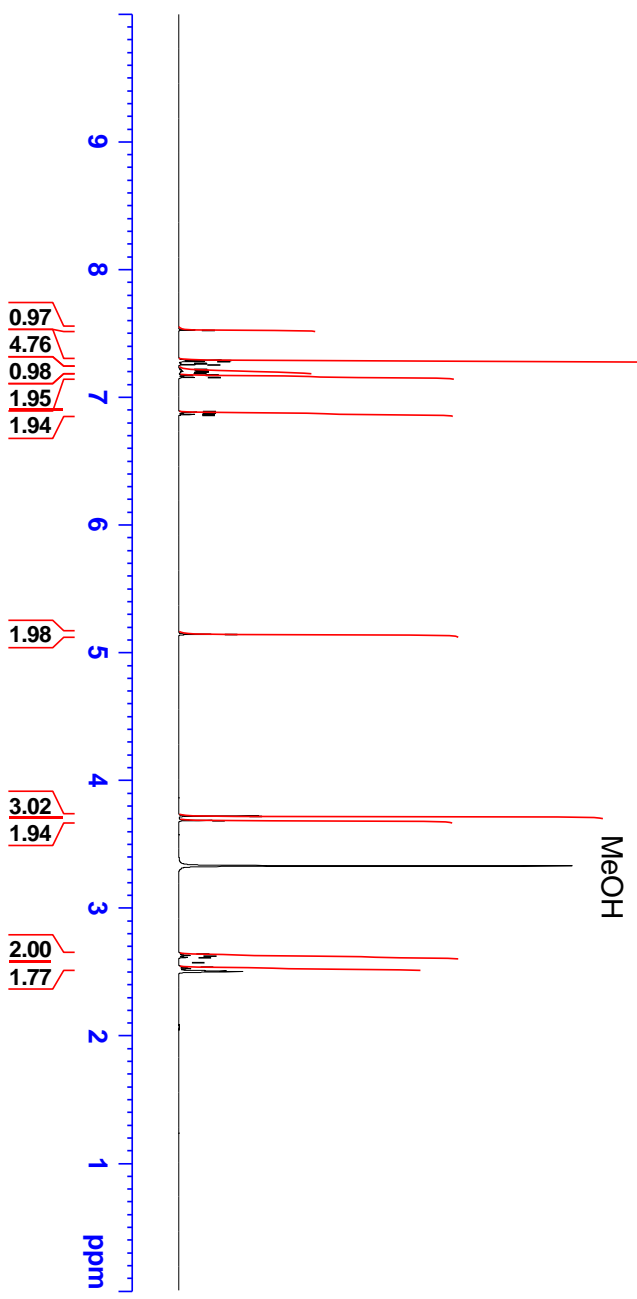

N-benzyl-2-(1-(4-methoxybenzyl)-1H-pyrazol-4-yl)ethan-1-amine

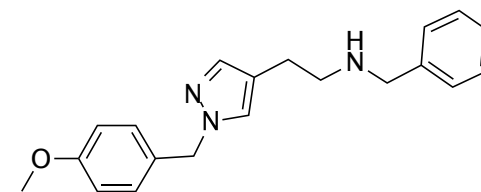

22

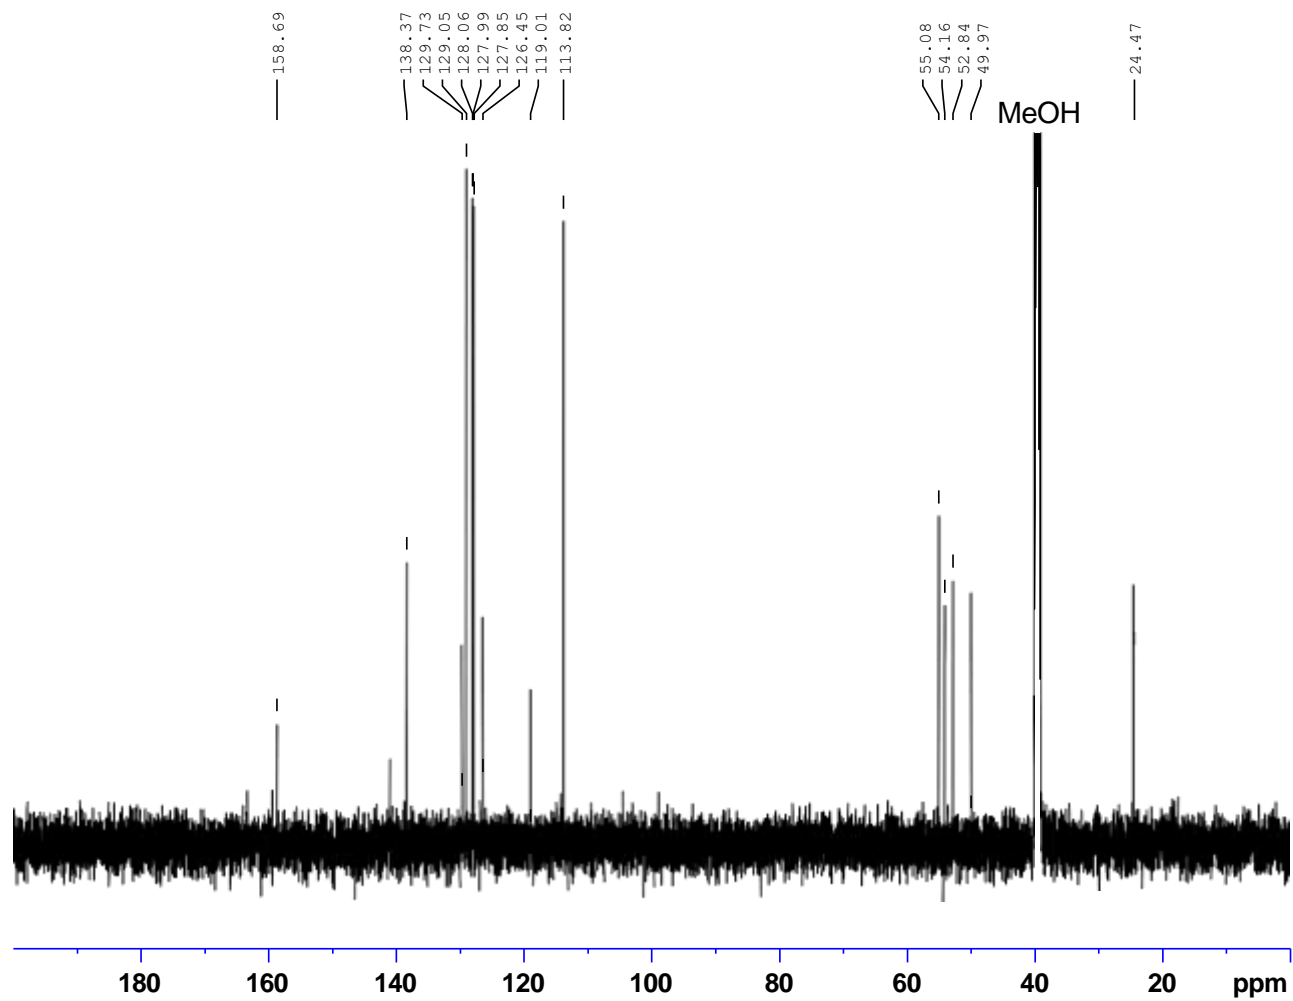

N-benzyl-2-(1-(4-methoxybenzyl)-1H-pyrazol-4-yl)-N-methylethan-1-amine

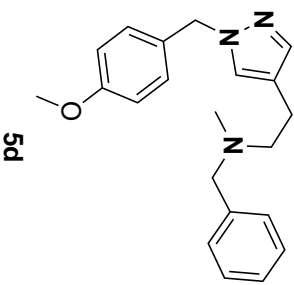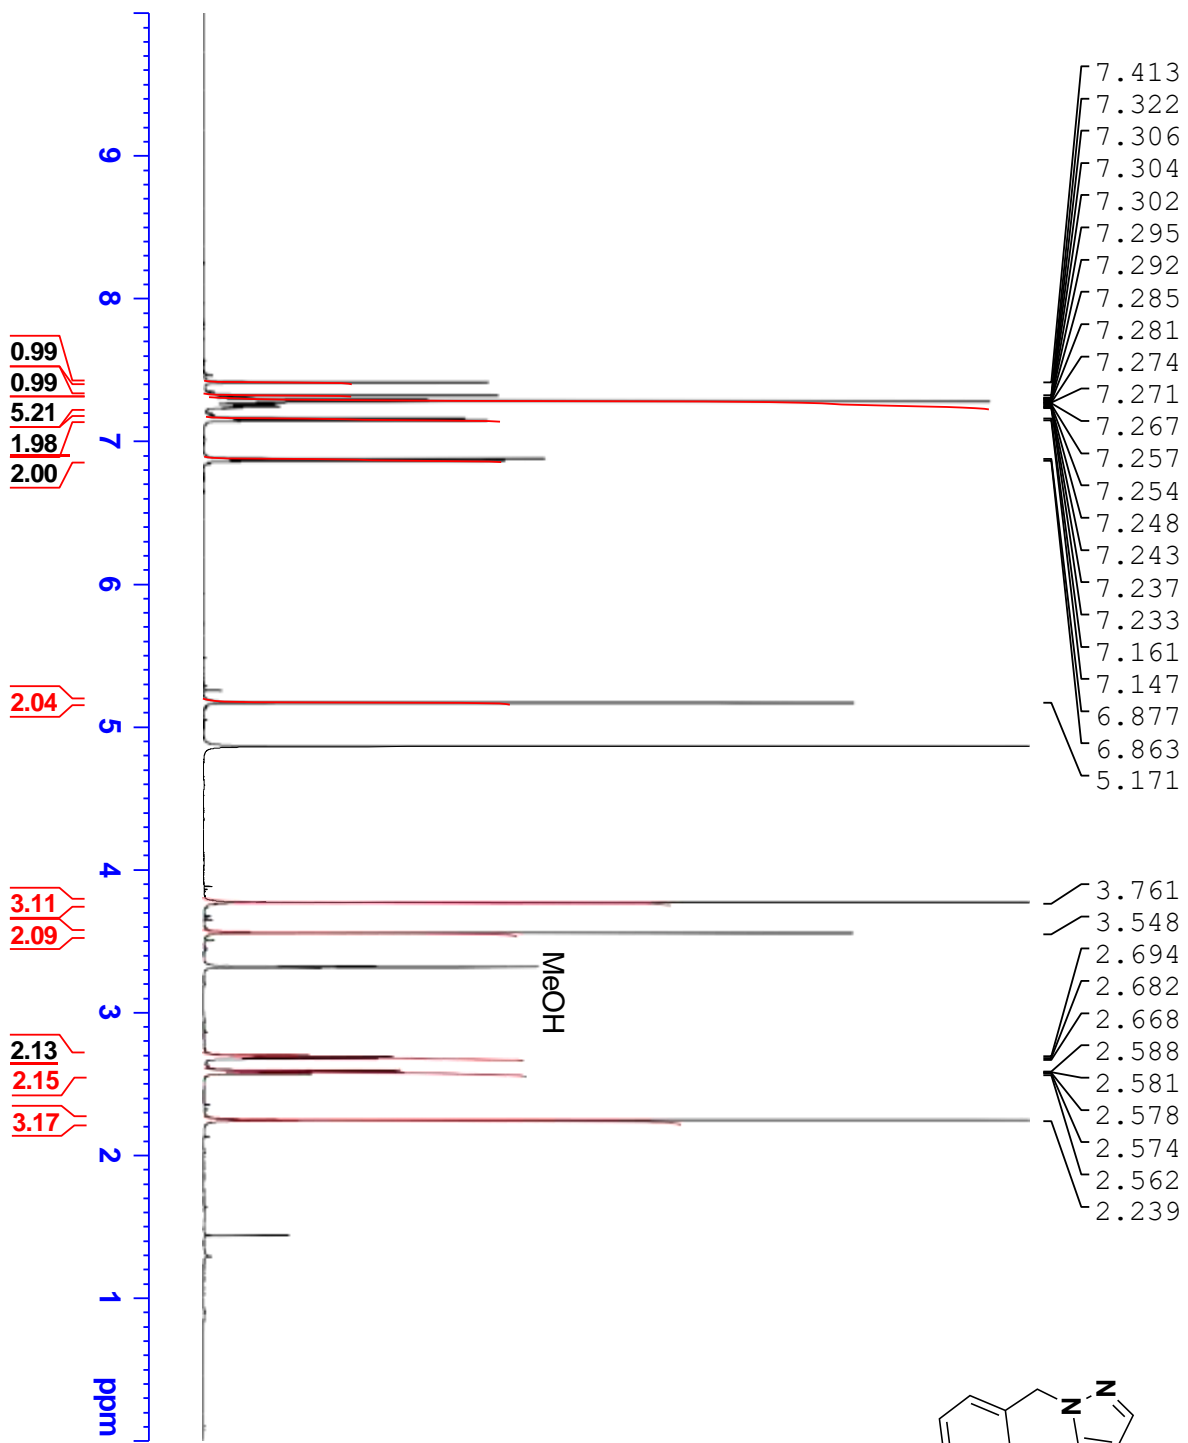



4-(2-chloroethyl)-1-tosyl-1H-pyrazole

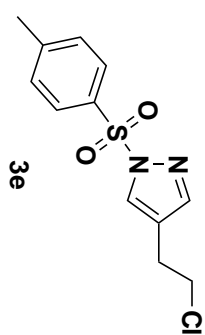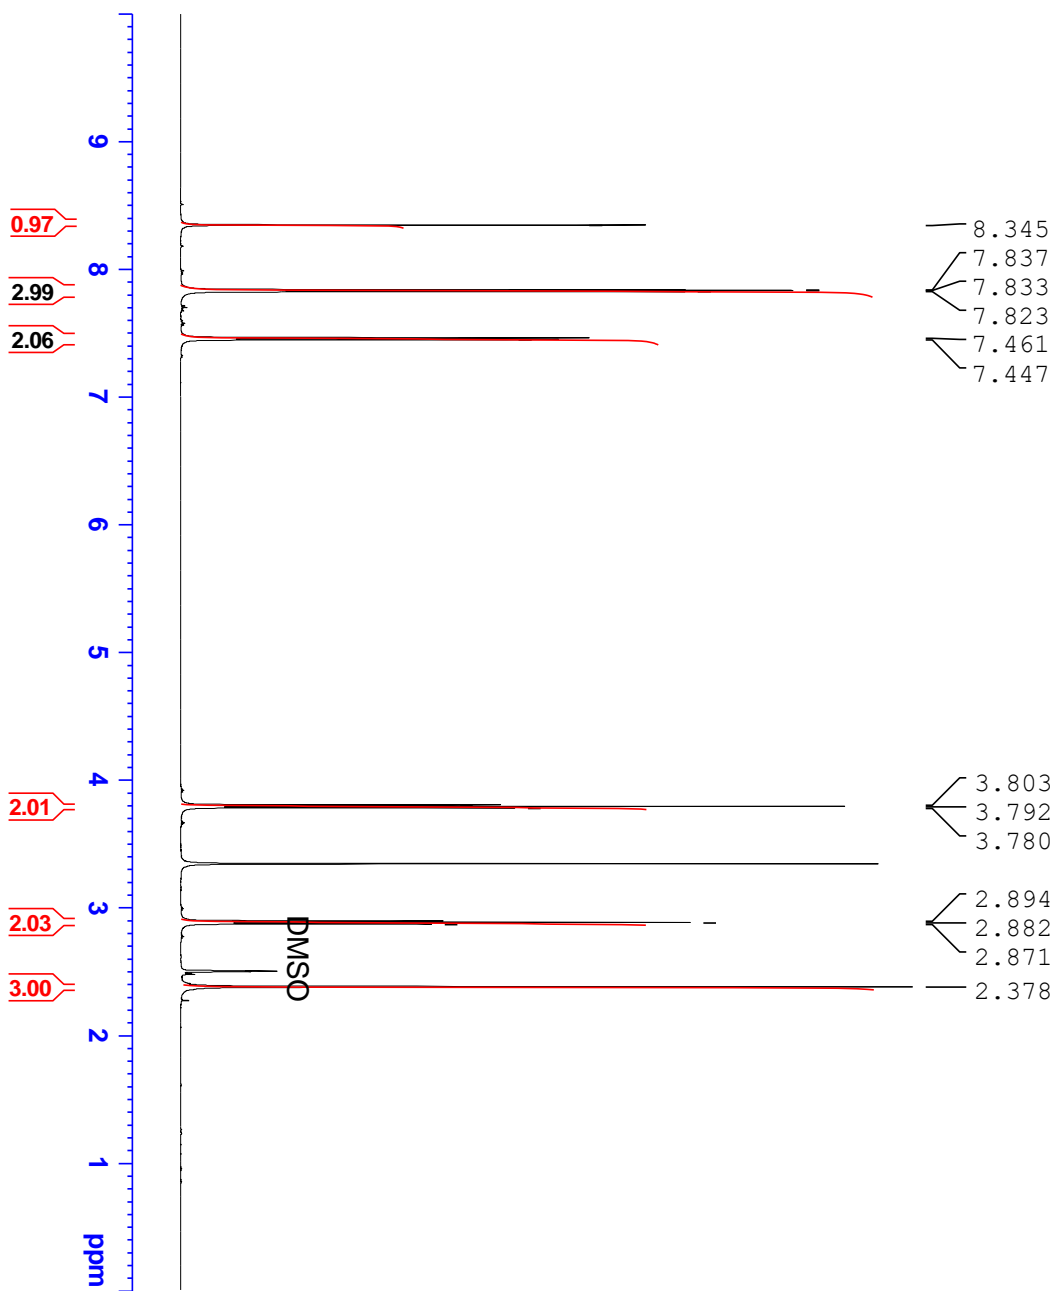

4-(2-chloroethyl)-1-tosyl-1H-pyrazole

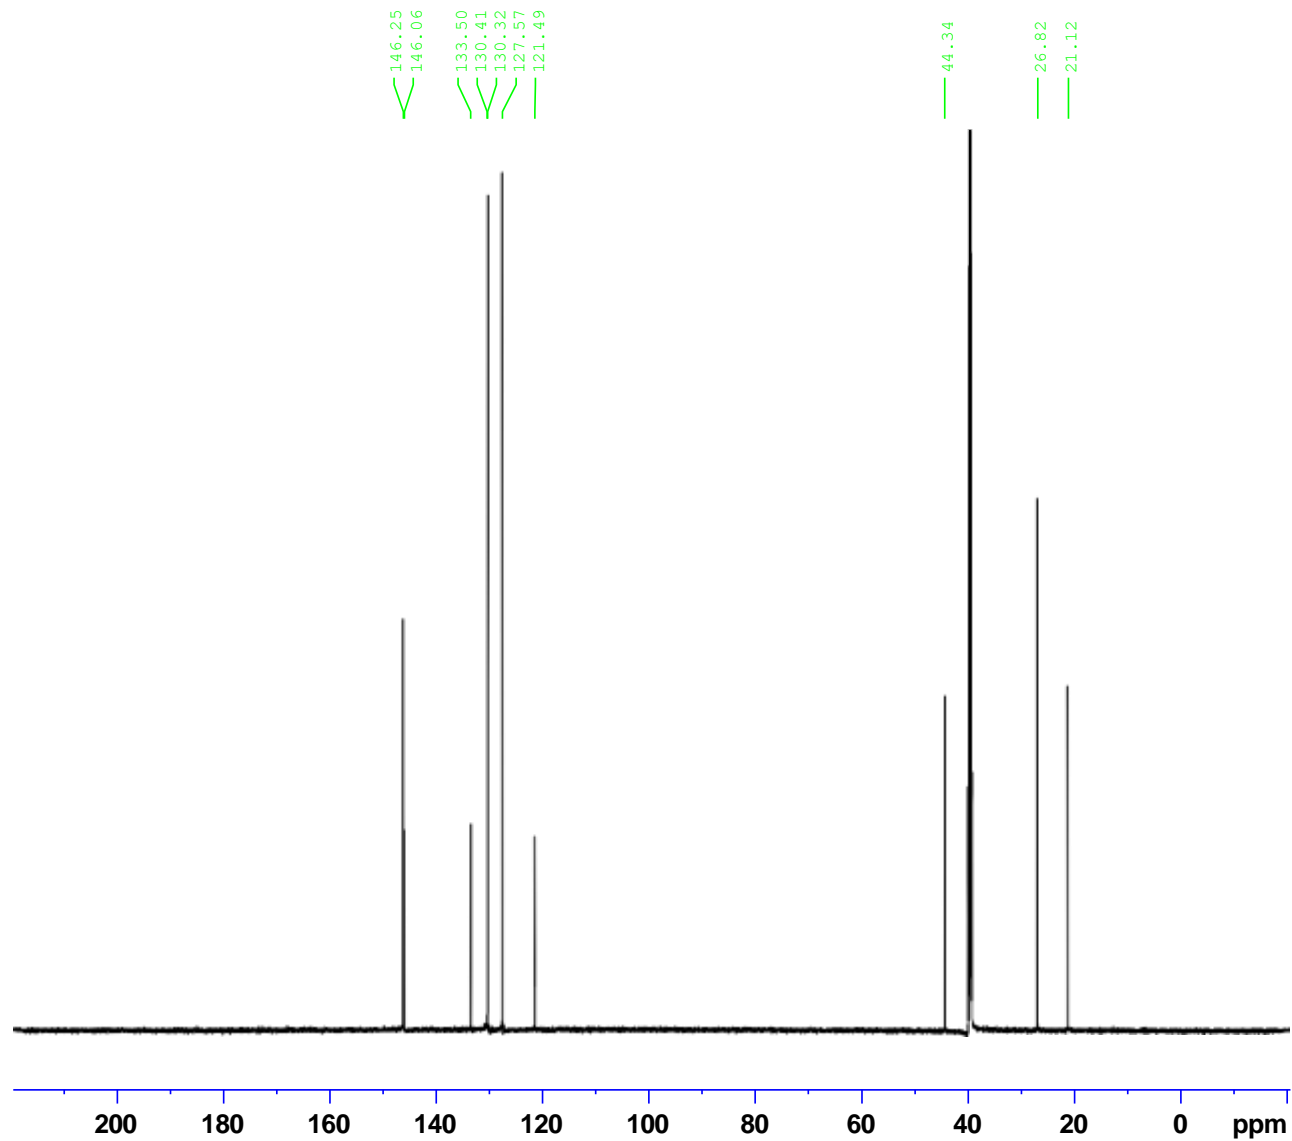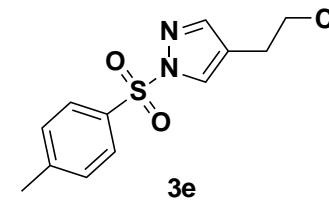

N-benzyl-2-(1-(4-methoxybenzyl)-1H-pyrazol-4-yl)-N-methylethan-1-amine

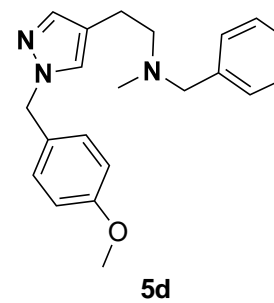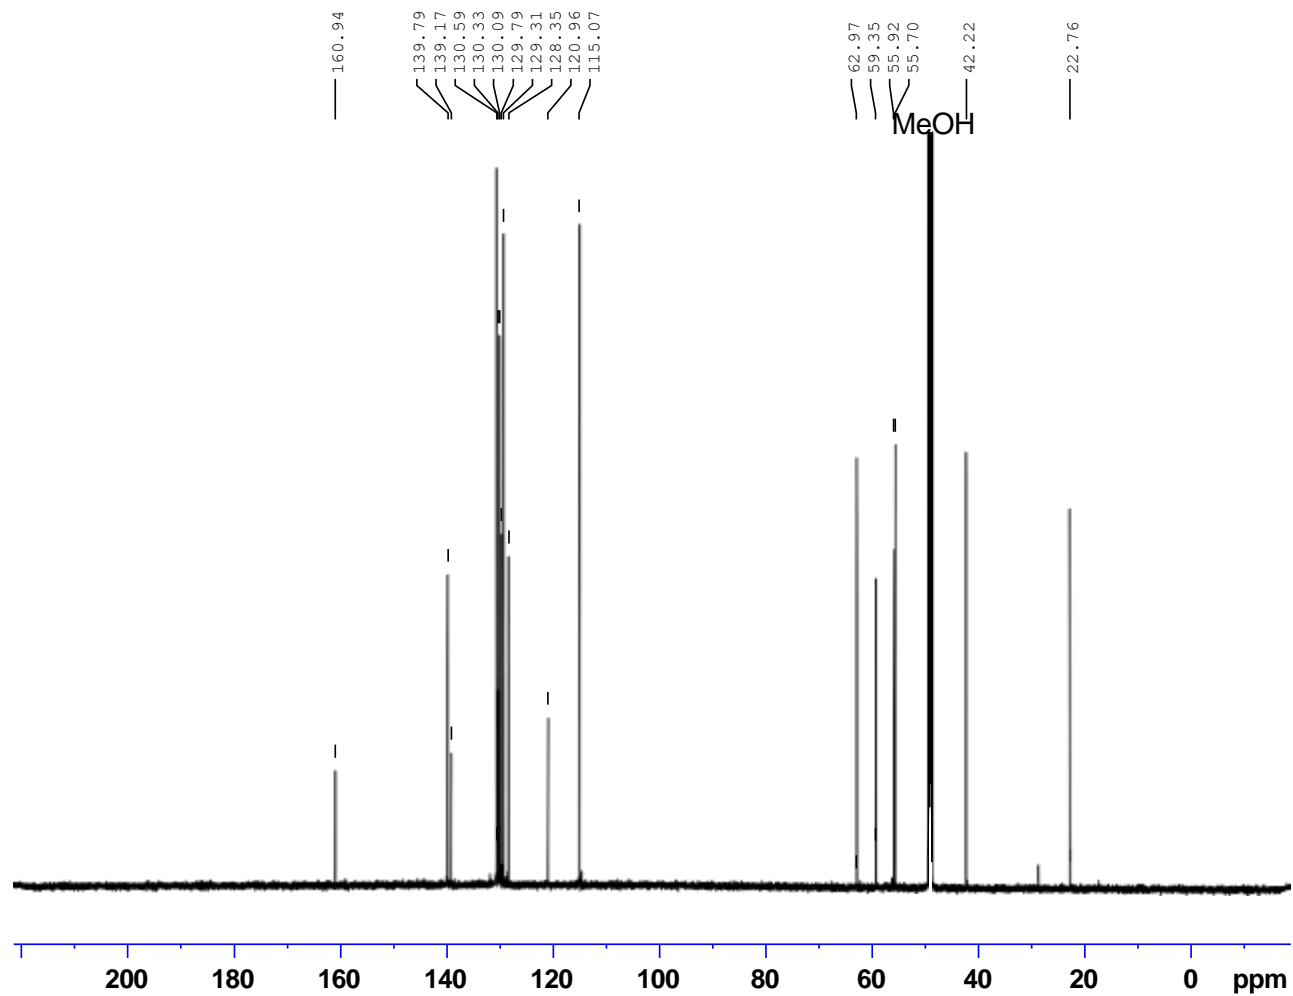

N-benzyl-N-methyl-2-(1-tosyl-1H-pyrazol-4-yl)ethan-1-amine

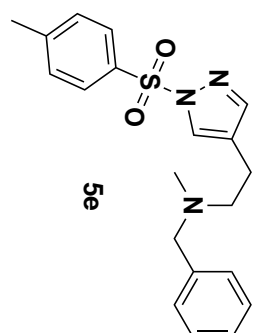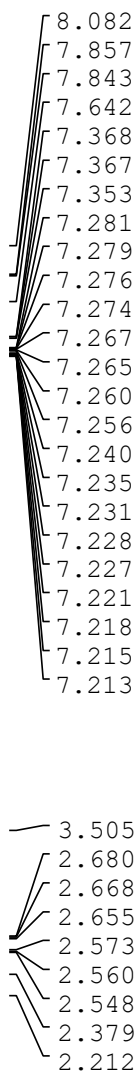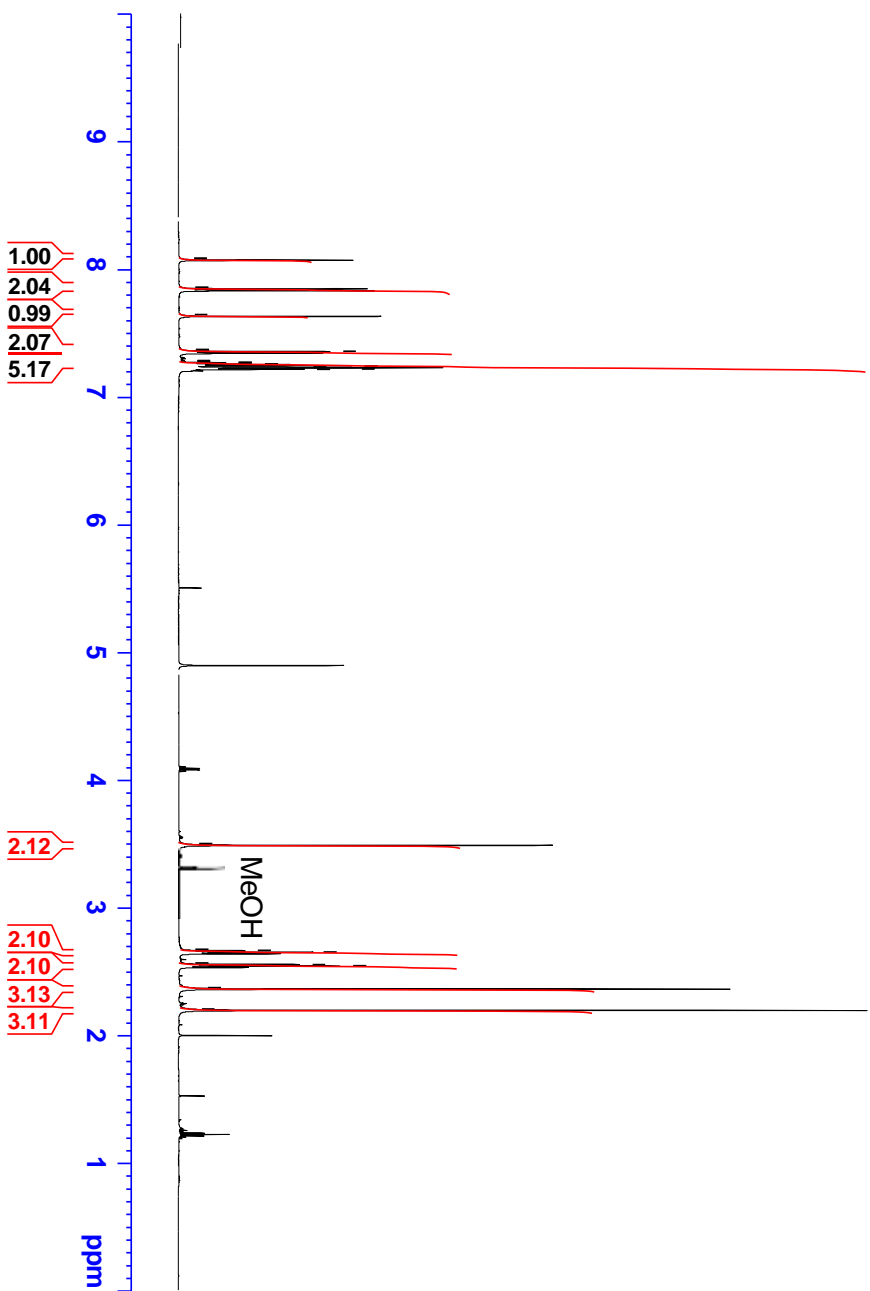

N-benzyl-N-methyl-2-(1-tosyl-1H-pyrazol-4-yl)ethan-1-amine

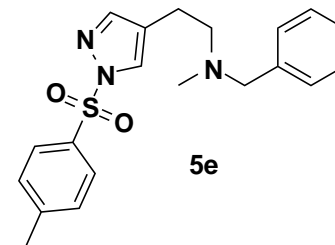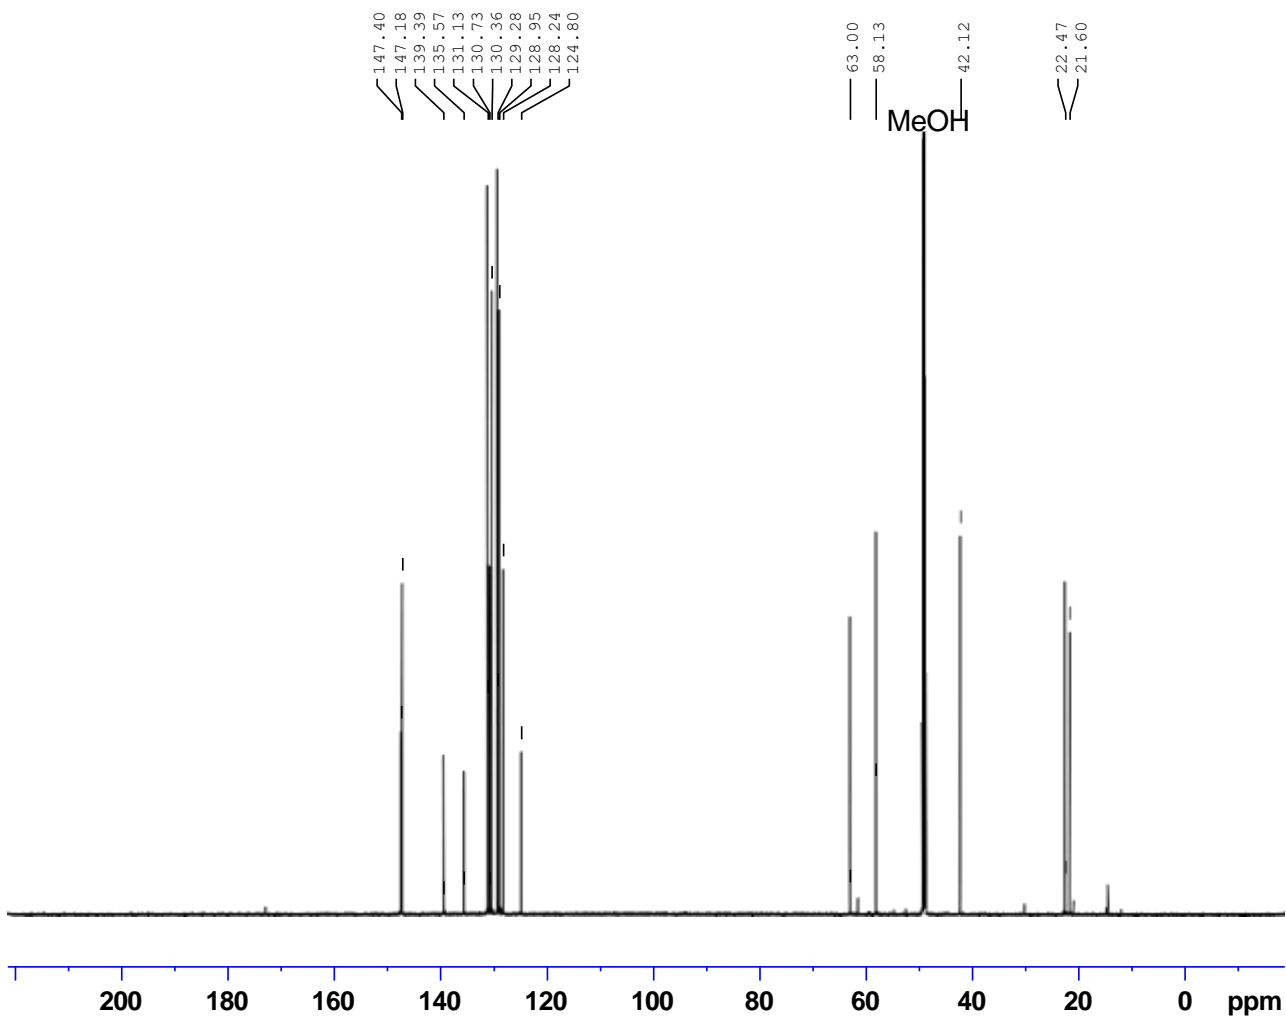

N-methyl-2-(1H-pyrrazol-4-yl)ethan-1-amine

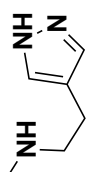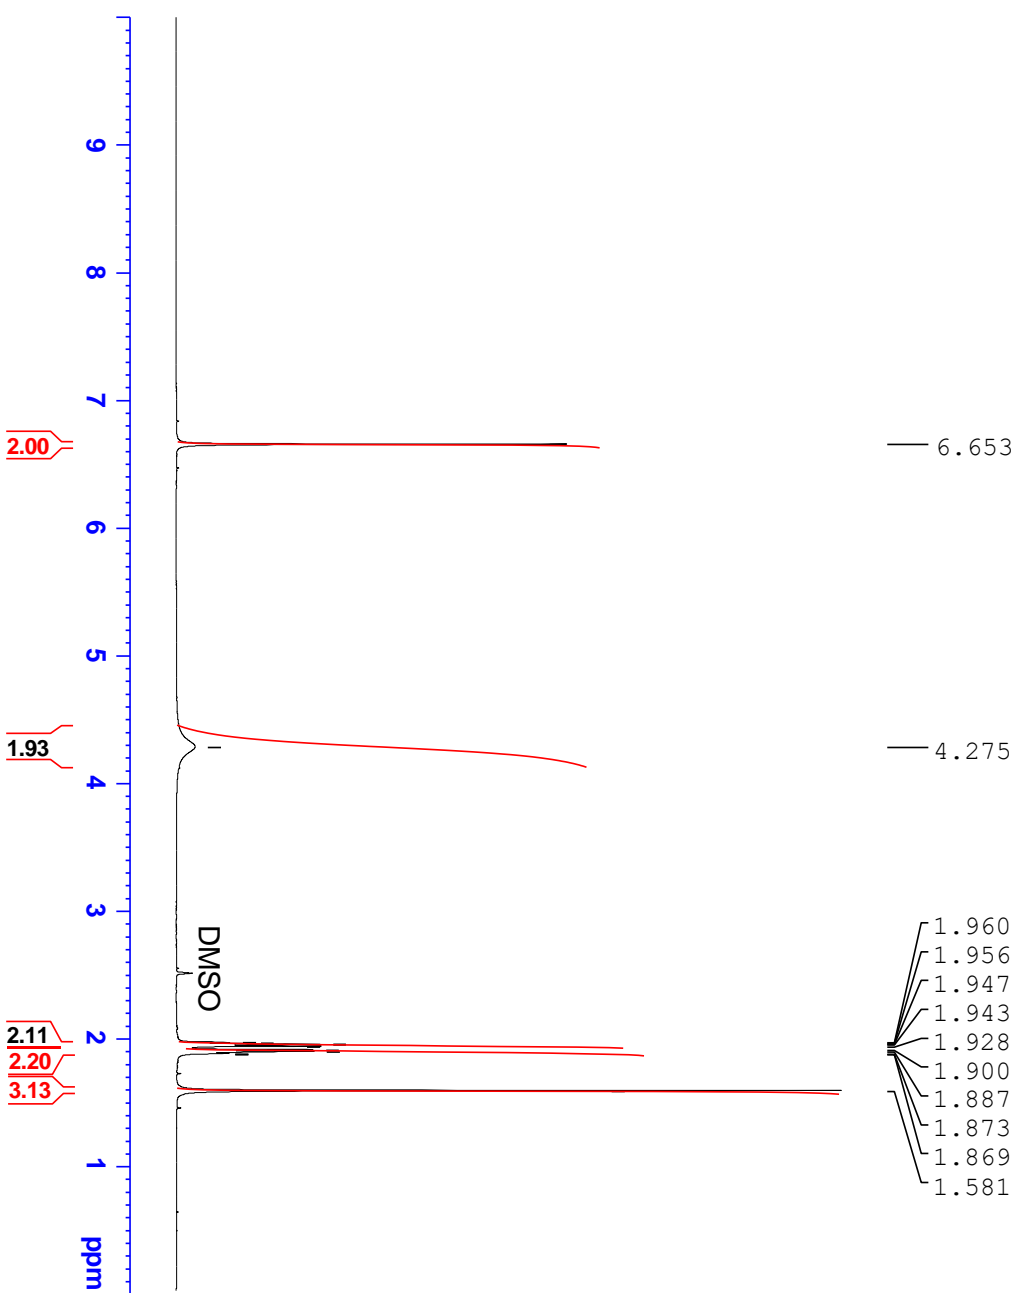

S54

N-methyl-2-(1H-pyrzool-4-yl)ethan-1-amine

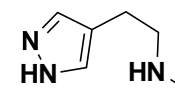

6a

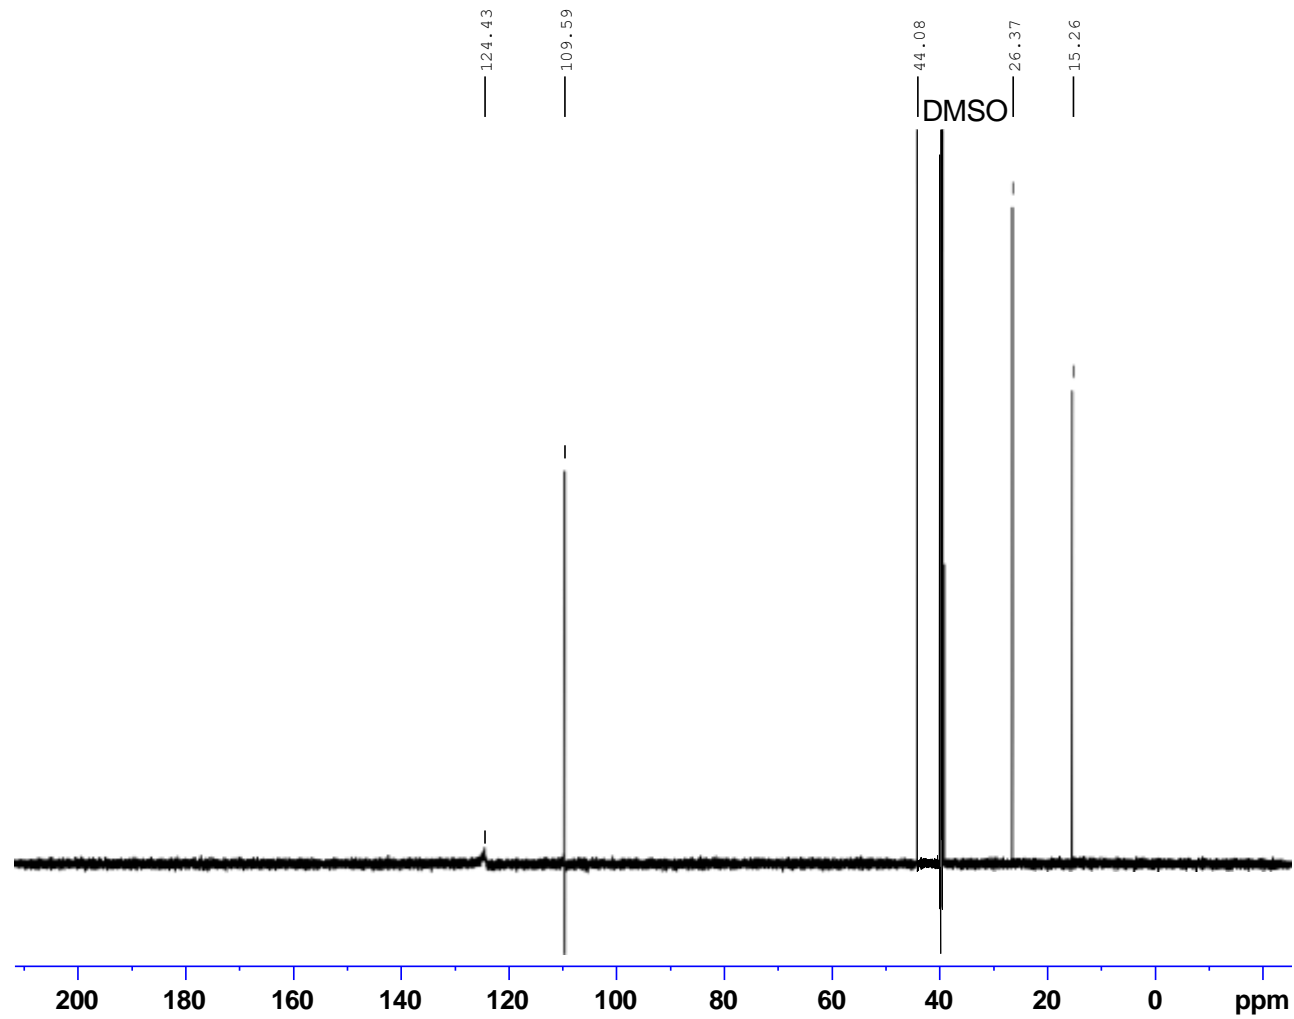

diboc-1-(2-(1H-pyrazol-4-yl)ethyl)-1-methylguanidine

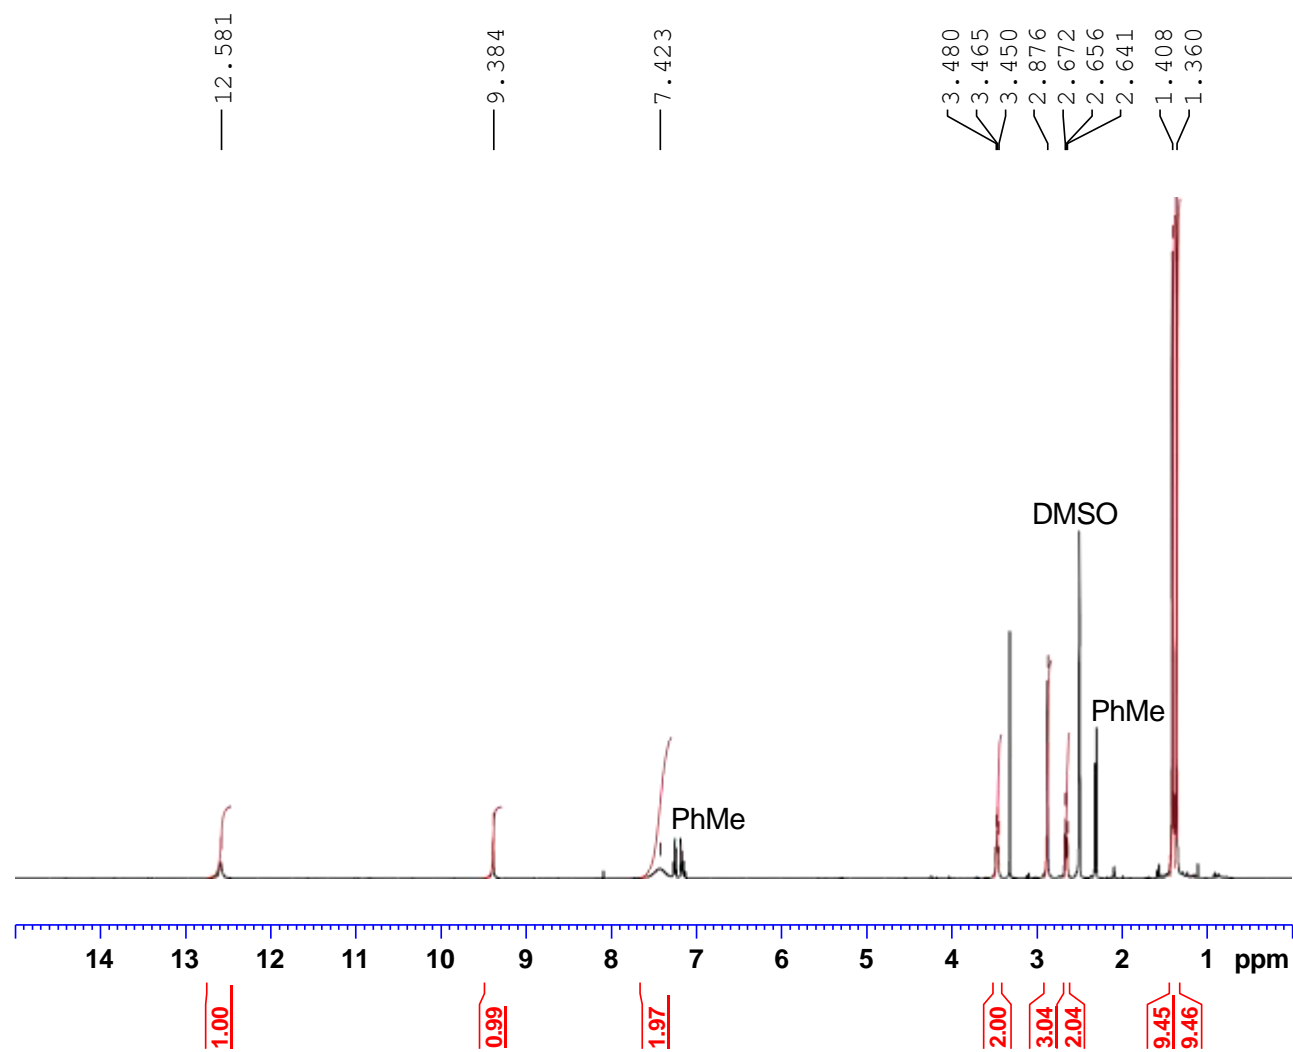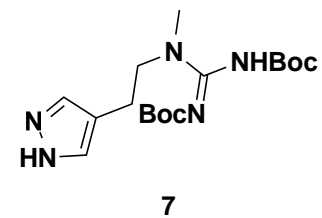



diboc-1-(2-(1H-pyrazol-4-yl)ethyl)-1-methylguanidine

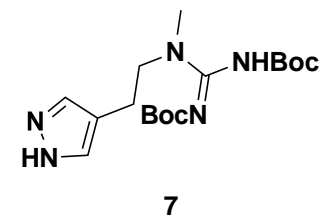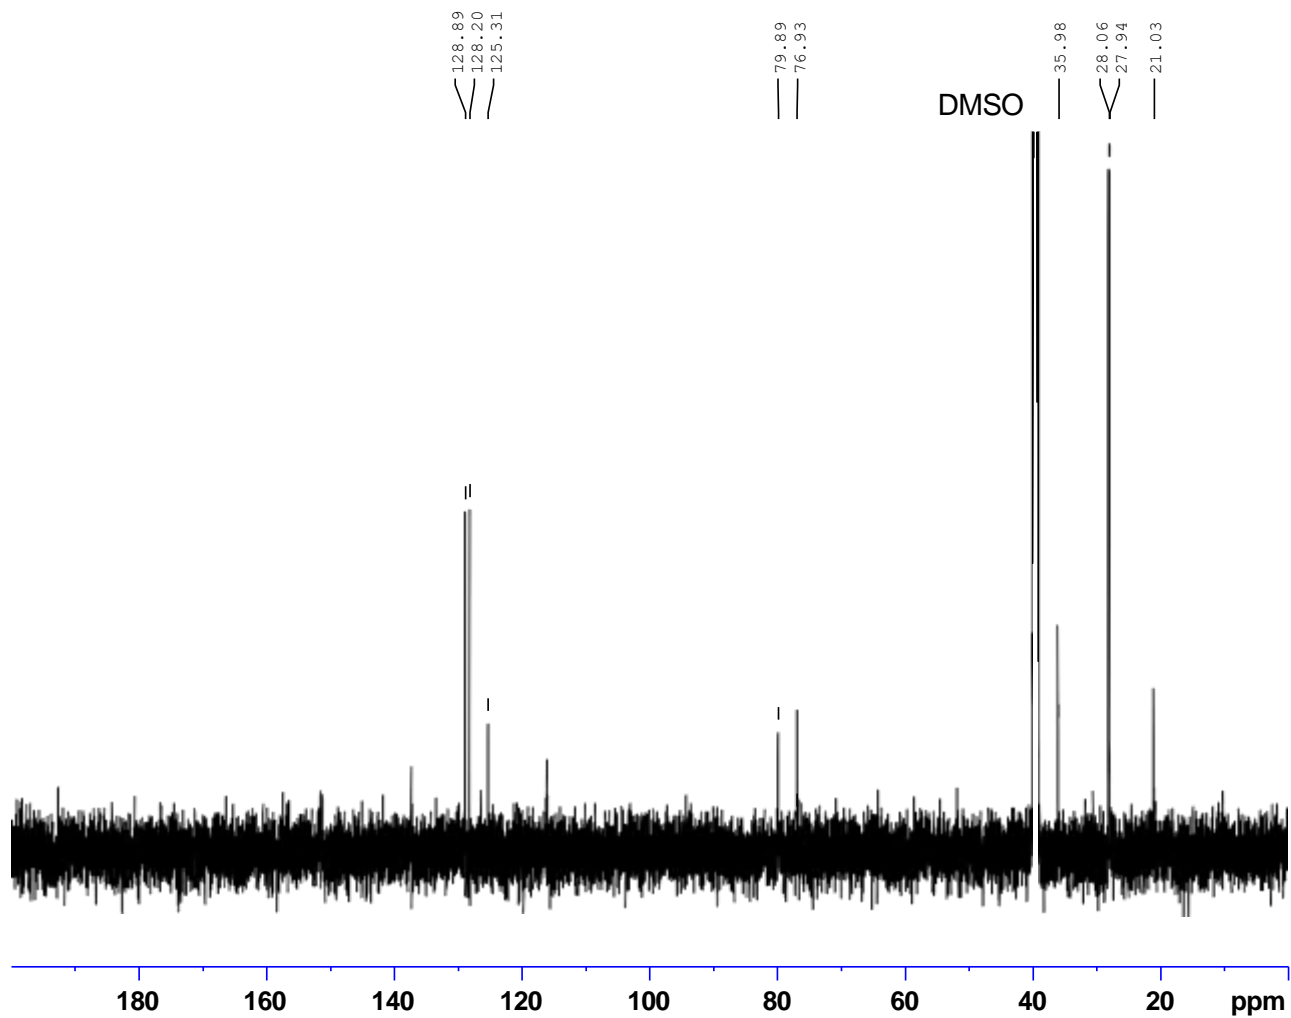

1-(2-(1H-pyrazol-4-yl)ethyl)-1-methylguanadine-2,2,2-trifluoroacetate (1/4)

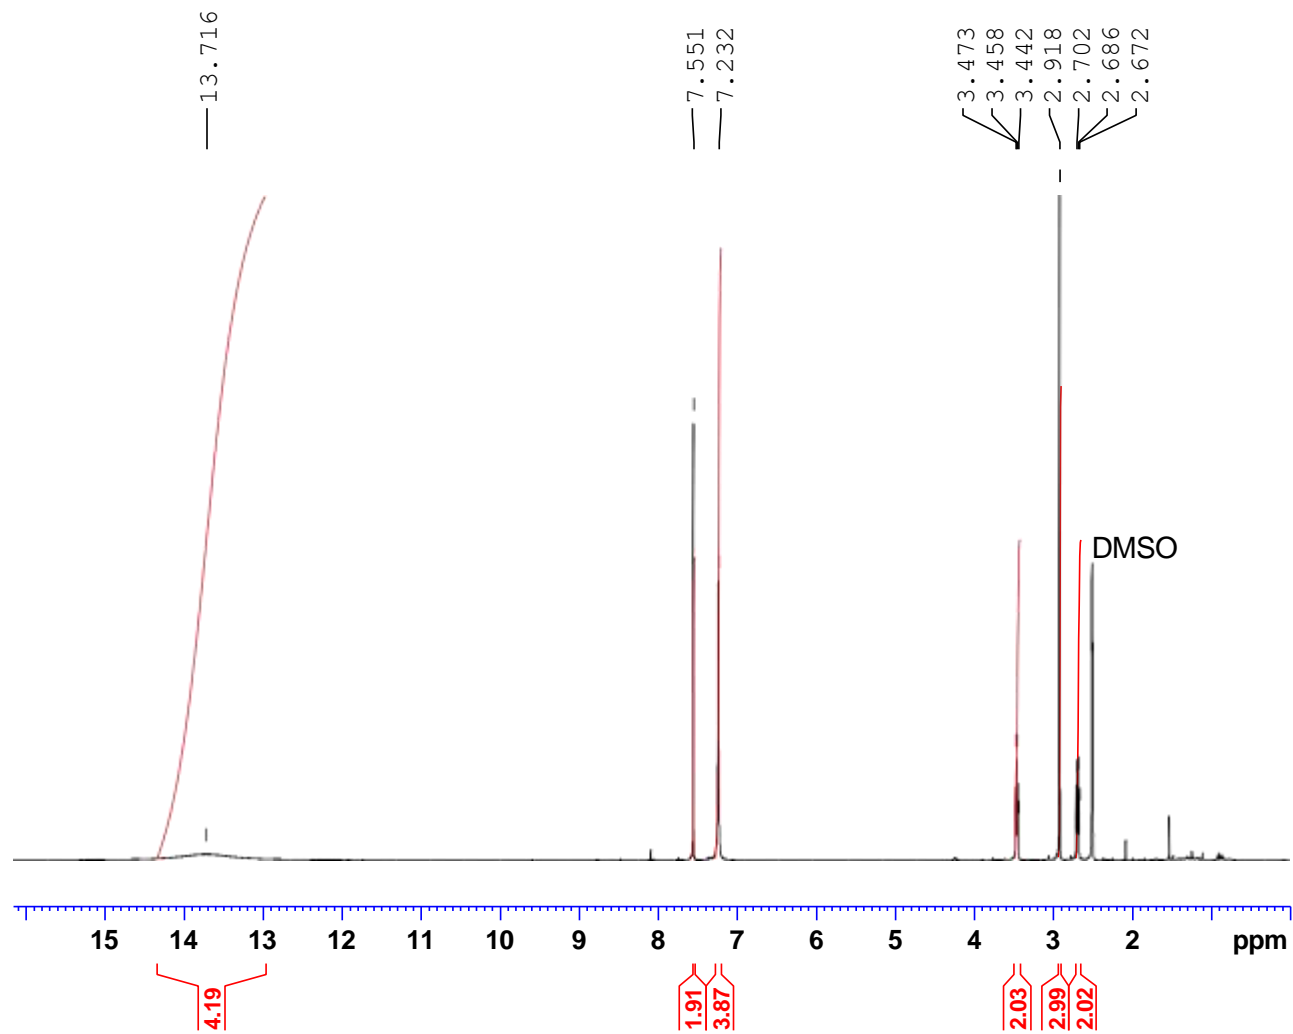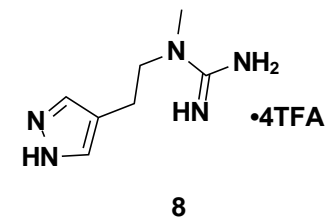

# Analysis Report

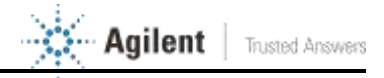

## Sample Information

|                       |              |                           |                                                                                          |
|-----------------------|--------------|---------------------------|------------------------------------------------------------------------------------------|
| <b>Name</b>           | LD-002-22-1  | <b>Data File Path</b>     | D:\MassHunter\Data\George\LD-002-22-1.d                                                  |
| <b>Sample ID</b>      |              | <b>Acq. Time (Local)</b>  | 3/7/2023 10:12:00 AM (UTC-05:00)                                                         |
| <b>Instrument</b>     | Instrument 1 | <b>Method Path (Acq)</b>  | D:\MassHunter\Methods\George\George_HRMS.m                                               |
| <b>MS Type</b>        | TOF          | <b>Version (Acq SW)</b>   | 6200 series TOF/6500 series Q-TOF 10.1 (48.0)                                            |
| <b>Inj. Vol. (ul)</b> | 2            | <b>IRM Status</b>         | Success                                                                                  |
| <b>Position</b>       | P1-A1        | <b>Method Path (DA)</b>   | D:\MassHunter\Data\George\LD-002-22-1.d\Results\Qual\Version4\Hamdan_HPLC_10_90_15 min.m |
| <b>Plate Pos.</b>     |              | <b>Target Source Path</b> |                                                                                          |
| <b>Operator</b>       |              | <b>Result Summary</b>     |                                                                                          |

## Sample Chromatograms

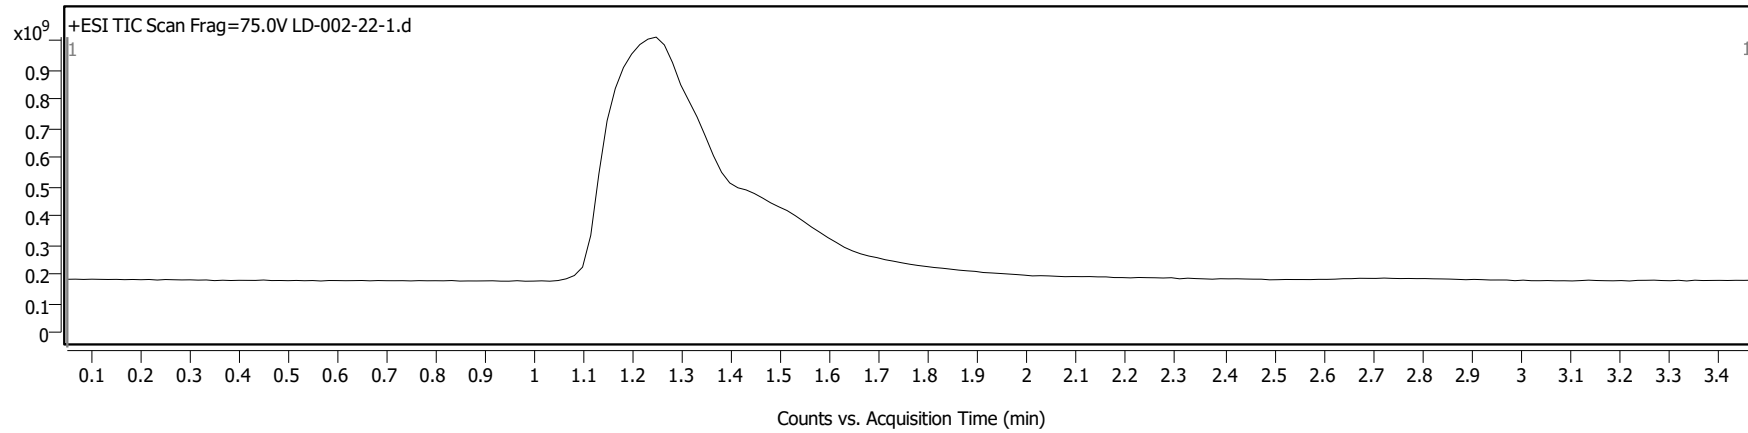

MassHunter Qual 10.0  
(End of Report)

# User Spectrum Plot Report

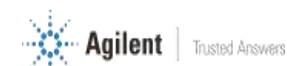

|                |               |              |               |            |              |                                                       |
|----------------|---------------|--------------|---------------|------------|--------------|-------------------------------------------------------|
| Name           | LD-002-22-1   | Rack Pos.    |               | Instrument | Instrument 1 | Operator                                              |
| Inj. Vol. (ul) | 2             | Plate Pos.   |               | IRM Status | Success      |                                                       |
| Data File      | LD-002-22-1.d | Method (Acq) | George_HRMS.m | Comment    |              | Acq. Time (Local) 3/7/2023 10:12:00 AM<br>(UTC-05:00) |

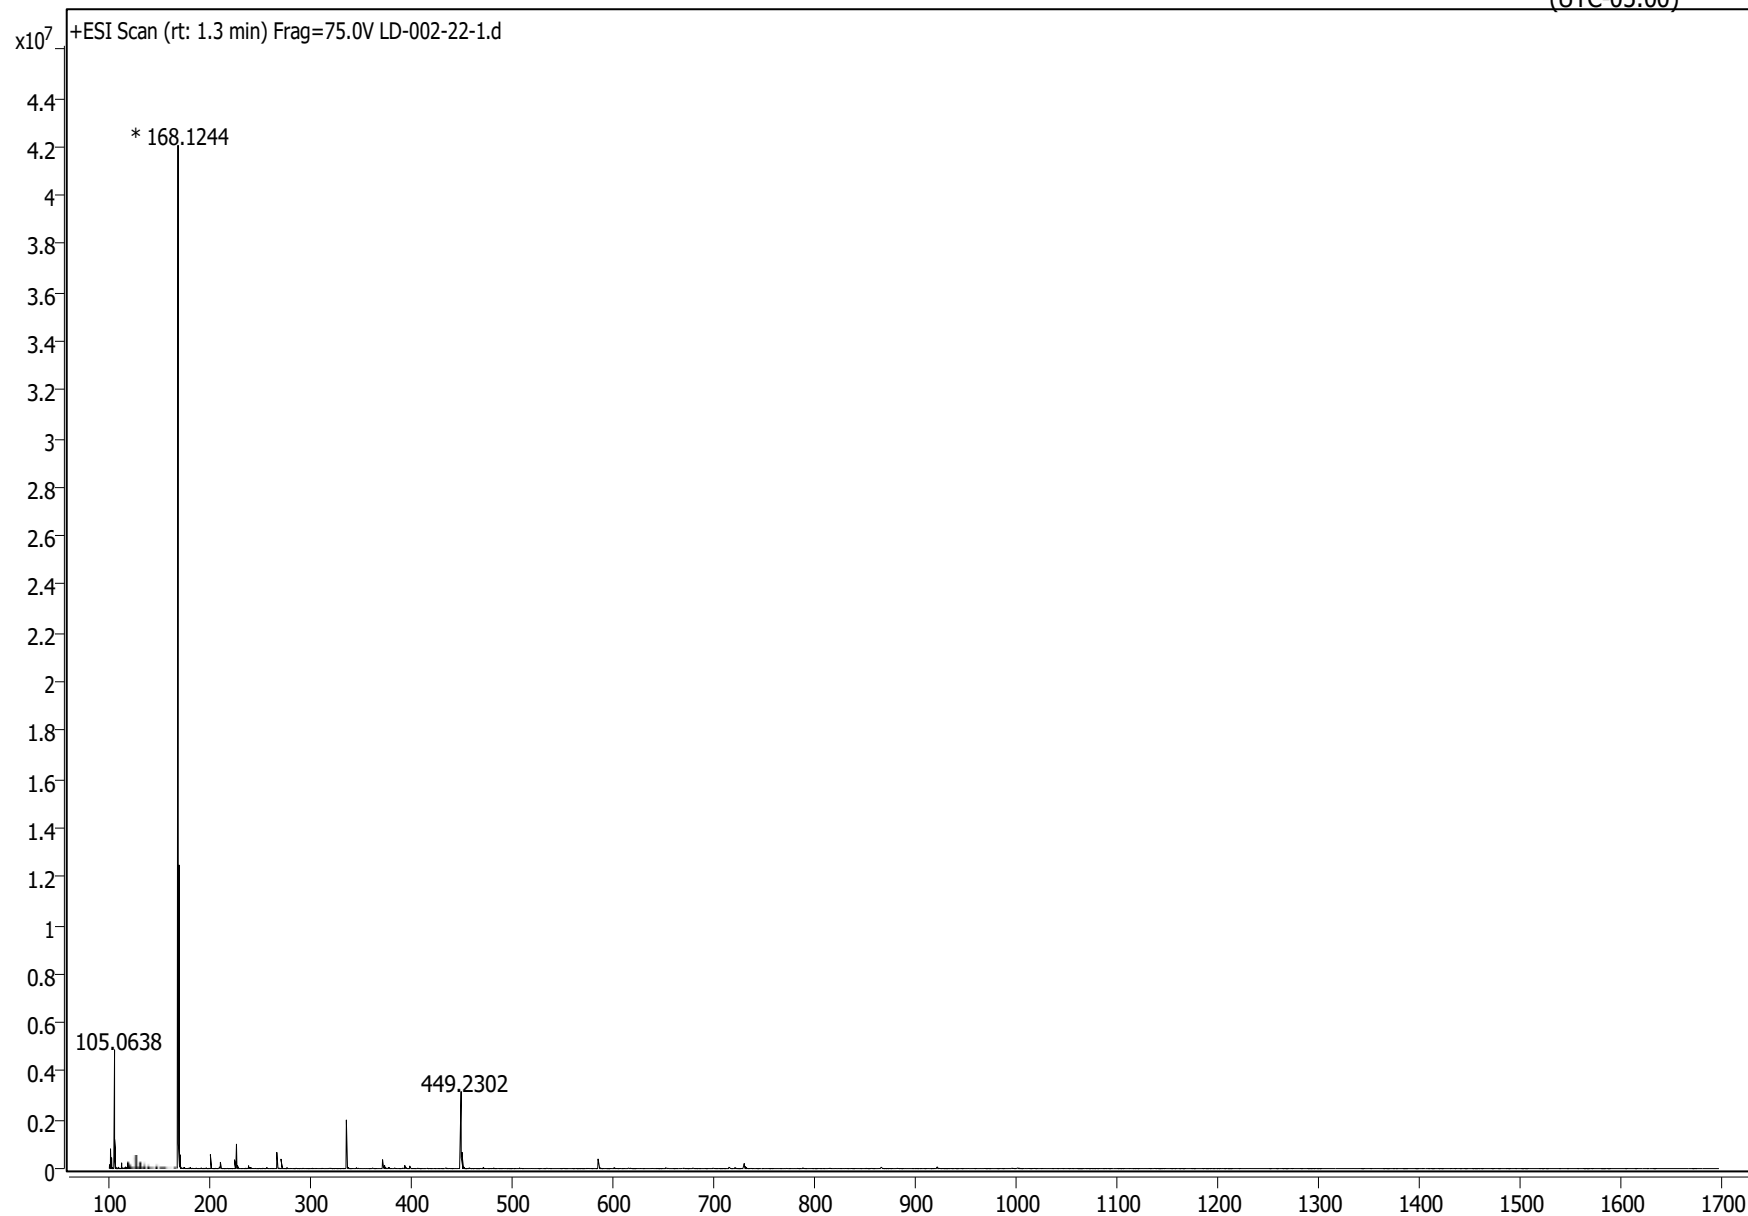

1-cyclopropyl-2-(3-methylisoxazol-5-yl)ethan-1-one

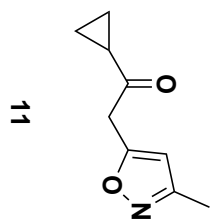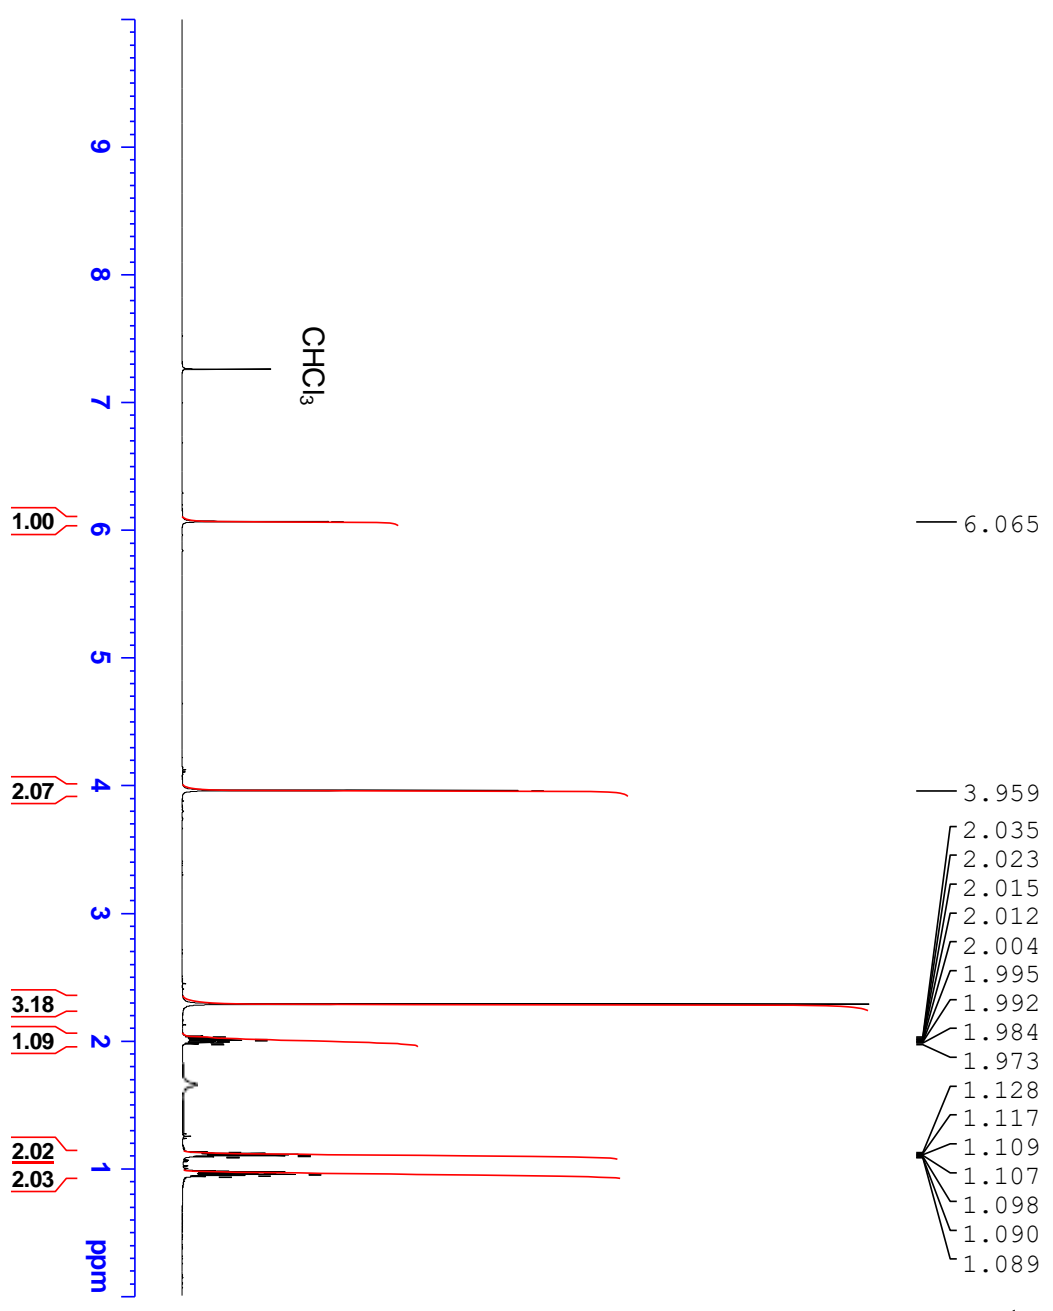

1-cyclopropyl-2-(3-methylisoxazol-5-yl)ethan-1-one

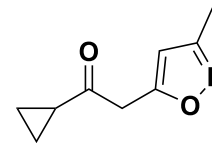

11

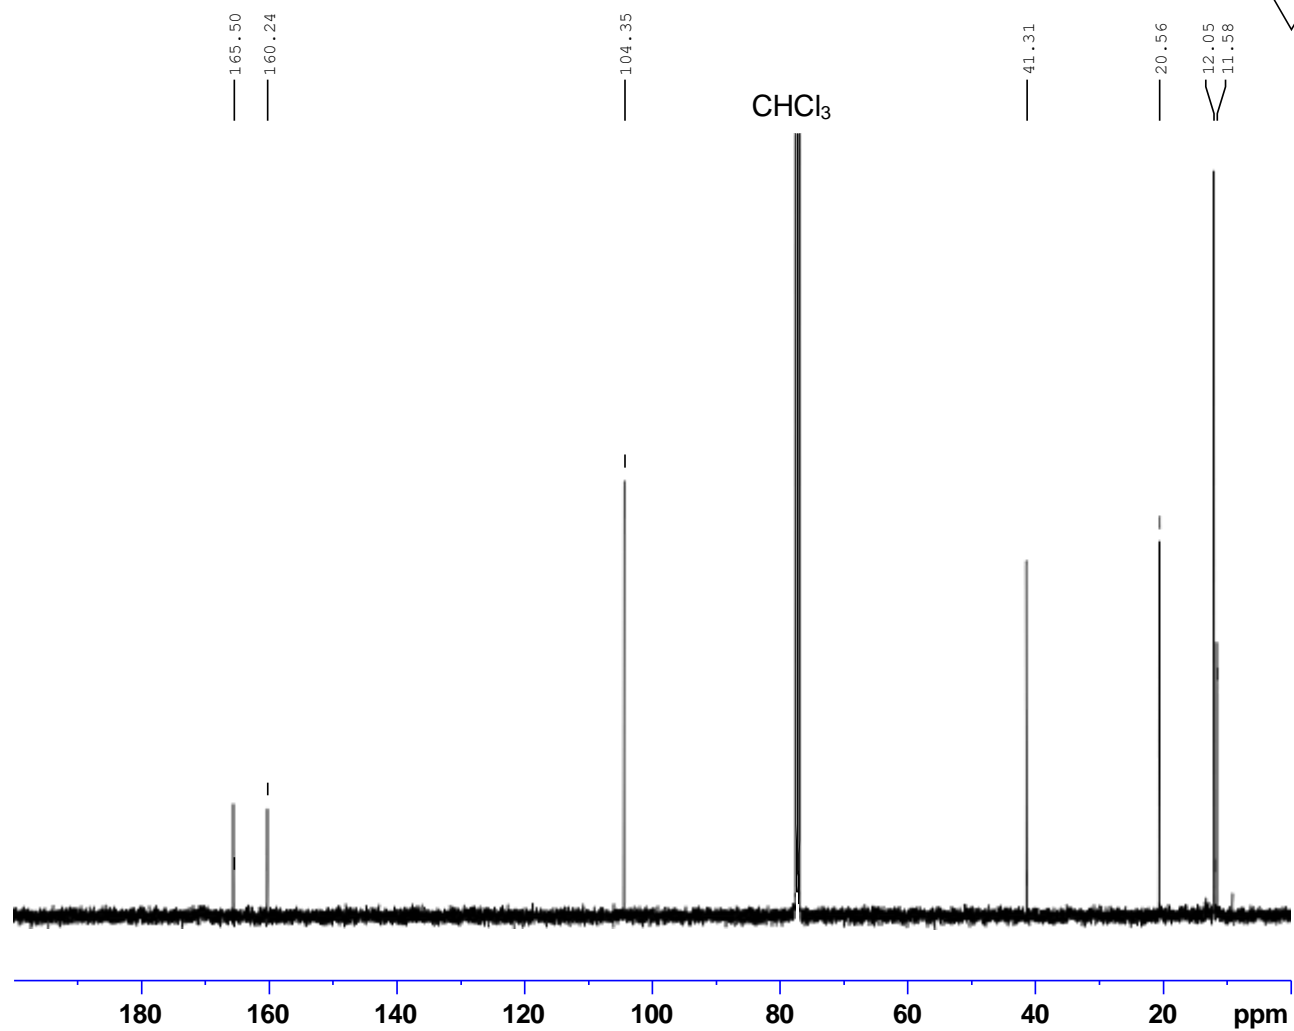

(Z)-1-(1-cyclopropyl-3-(dimethylamino)-2-(3-methylisoxazol-5-yl)prop-2-ene-1-one

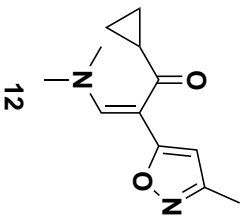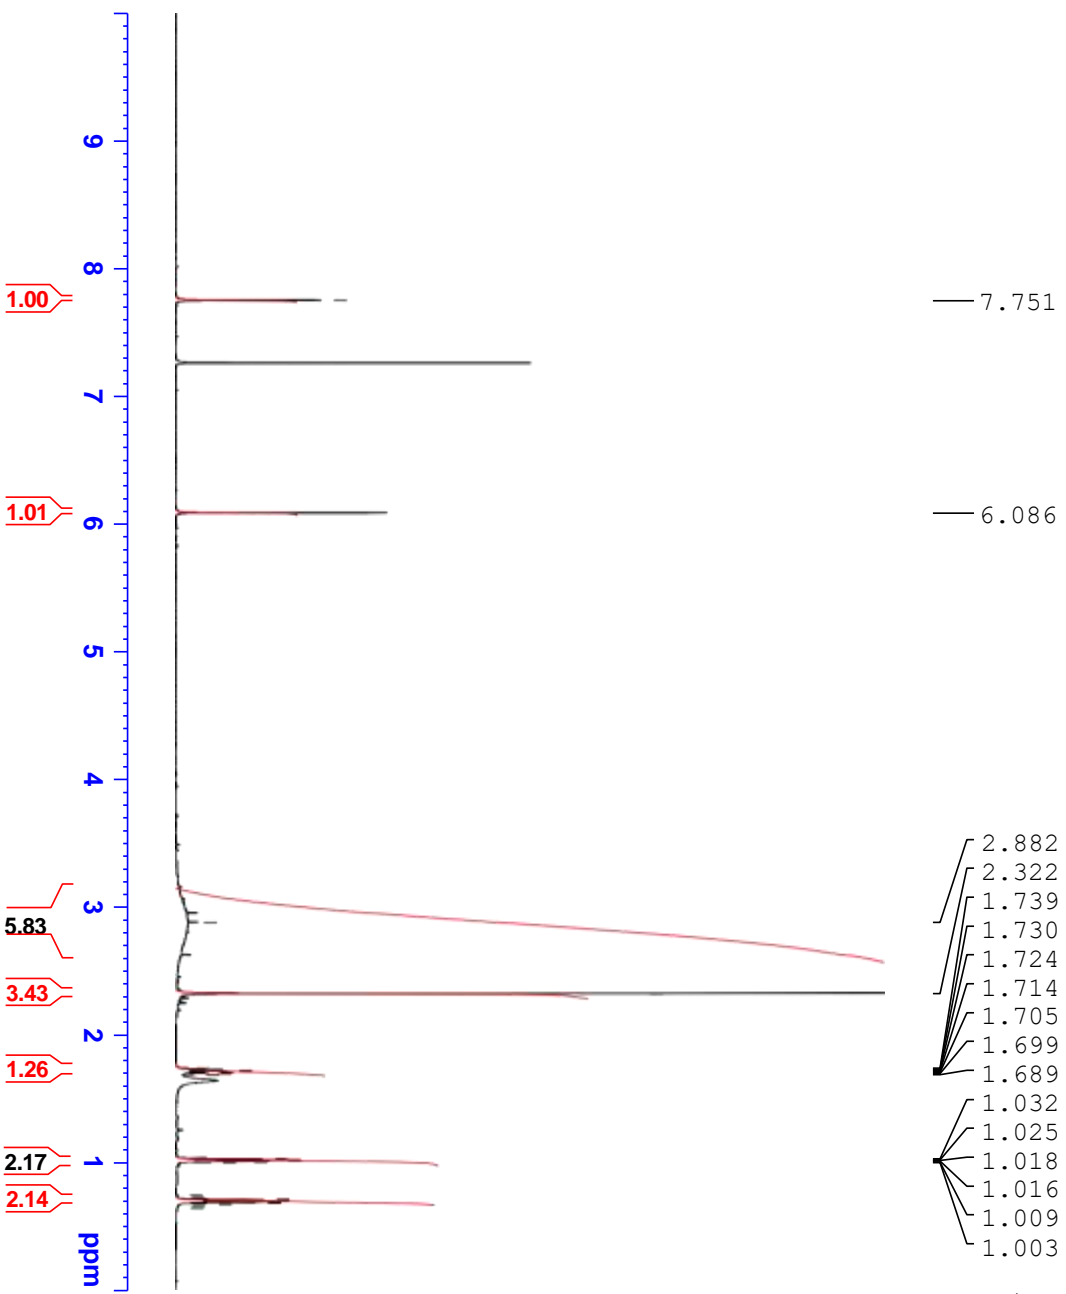

# Analysis Report

## Sample Information

|                       |              |                           |                                                 |
|-----------------------|--------------|---------------------------|-------------------------------------------------|
| <b>Name</b>           | LD-001-6     | <b>Data File Path</b>     | D:\MassHunter\Data\Louise\LD-001-6.d            |
| <b>Sample ID</b>      |              | <b>Acq. Time (Local)</b>  | 6/30/2023 1:41:06 PM (UTC-05:00)                |
| <b>Instrument</b>     | Instrument 1 | <b>Method Path (Acq)</b>  | D:\MassHunter\Methods\SR\Shafikur_HRMS method.m |
| <b>MS Type</b>        | TOF          | <b>Version (Acq SW)</b>   | 6200 series TOF/6500 series Q-TOF 10.1 (48.0)   |
| <b>Inj. Vol. (ul)</b> | 2            | <b>IRM Status</b>         | Success                                         |
| <b>Position</b>       | P1-A1        | <b>Method Path (DA)</b>   |                                                 |
| <b>Plate Pos.</b>     |              | <b>Target Source Path</b> |                                                 |
| <b>Operator</b>       |              | <b>Result Summary</b>     |                                                 |

## Sample Chromatograms

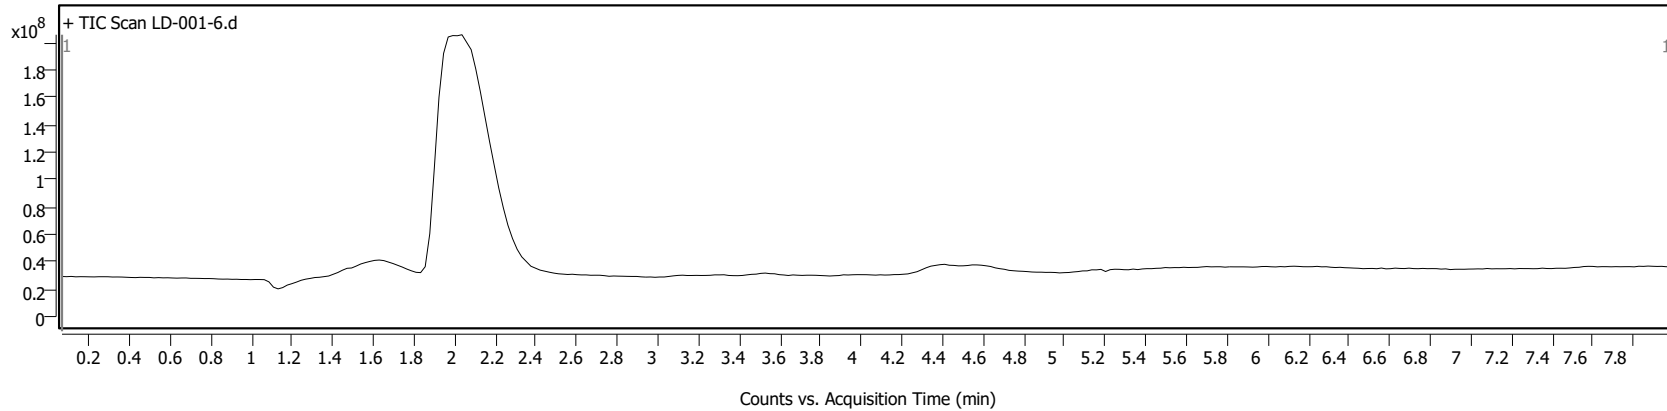

**MassHunter Qual 10.0**  
**(End of Report)**



# User Spectrum Plot Report

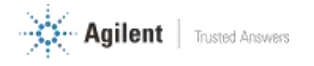

|                |            |              |                           |            |              |                   |                                     |
|----------------|------------|--------------|---------------------------|------------|--------------|-------------------|-------------------------------------|
| Name           | LD-001-6   | Rack Pos.    |                           | Instrument | Instrument 1 | Operator          |                                     |
| Inj. Vol. (ul) | 2          | Plate Pos.   |                           | IRM Status | Success      |                   |                                     |
| Data File      | LD-001-6.d | Method (Acq) | Shafikur_HRMS<br>method.m | Comment    |              | Acq. Time (Local) | 6/30/2023 1:41:06 PM<br>(UTC-05:00) |

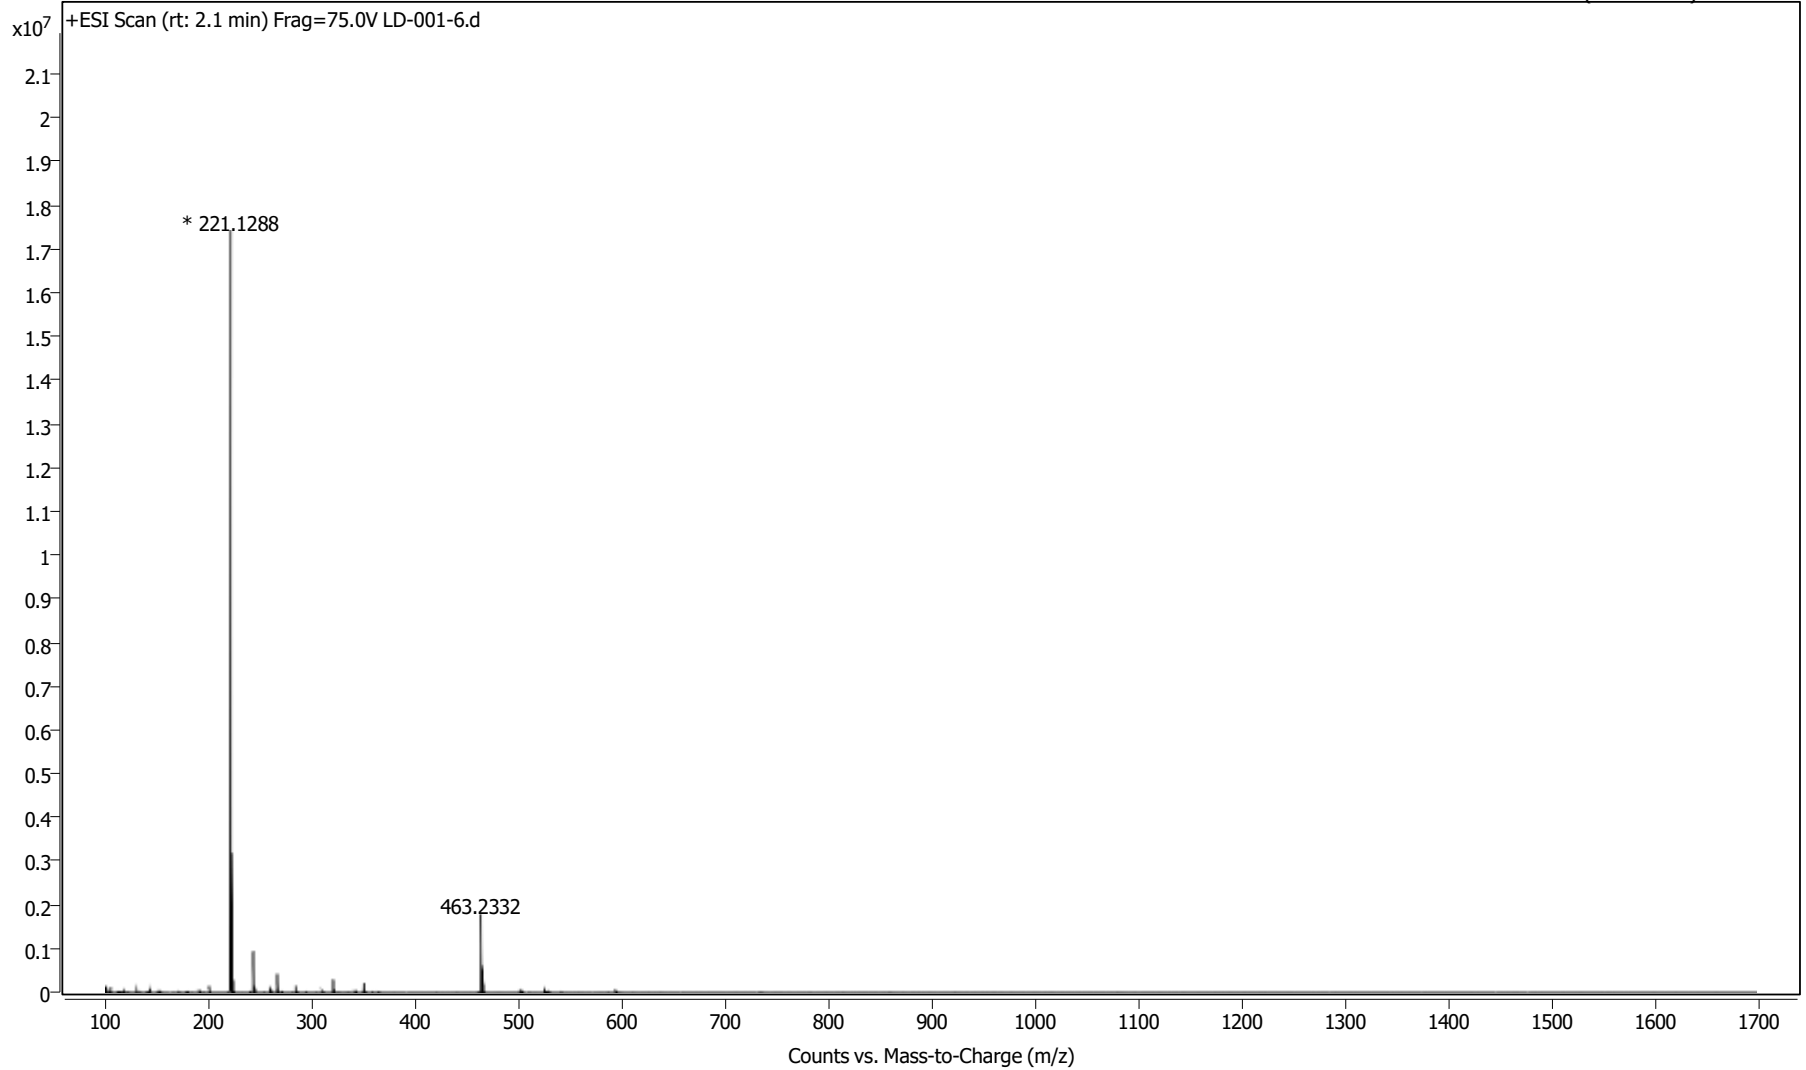

N-(2-(1H-pyrazol-4-yl)ethyl)-4-cyclopropyl-N-methyl-5-(3-methylisoxazol-5-yl)pyrimidin-2-amine

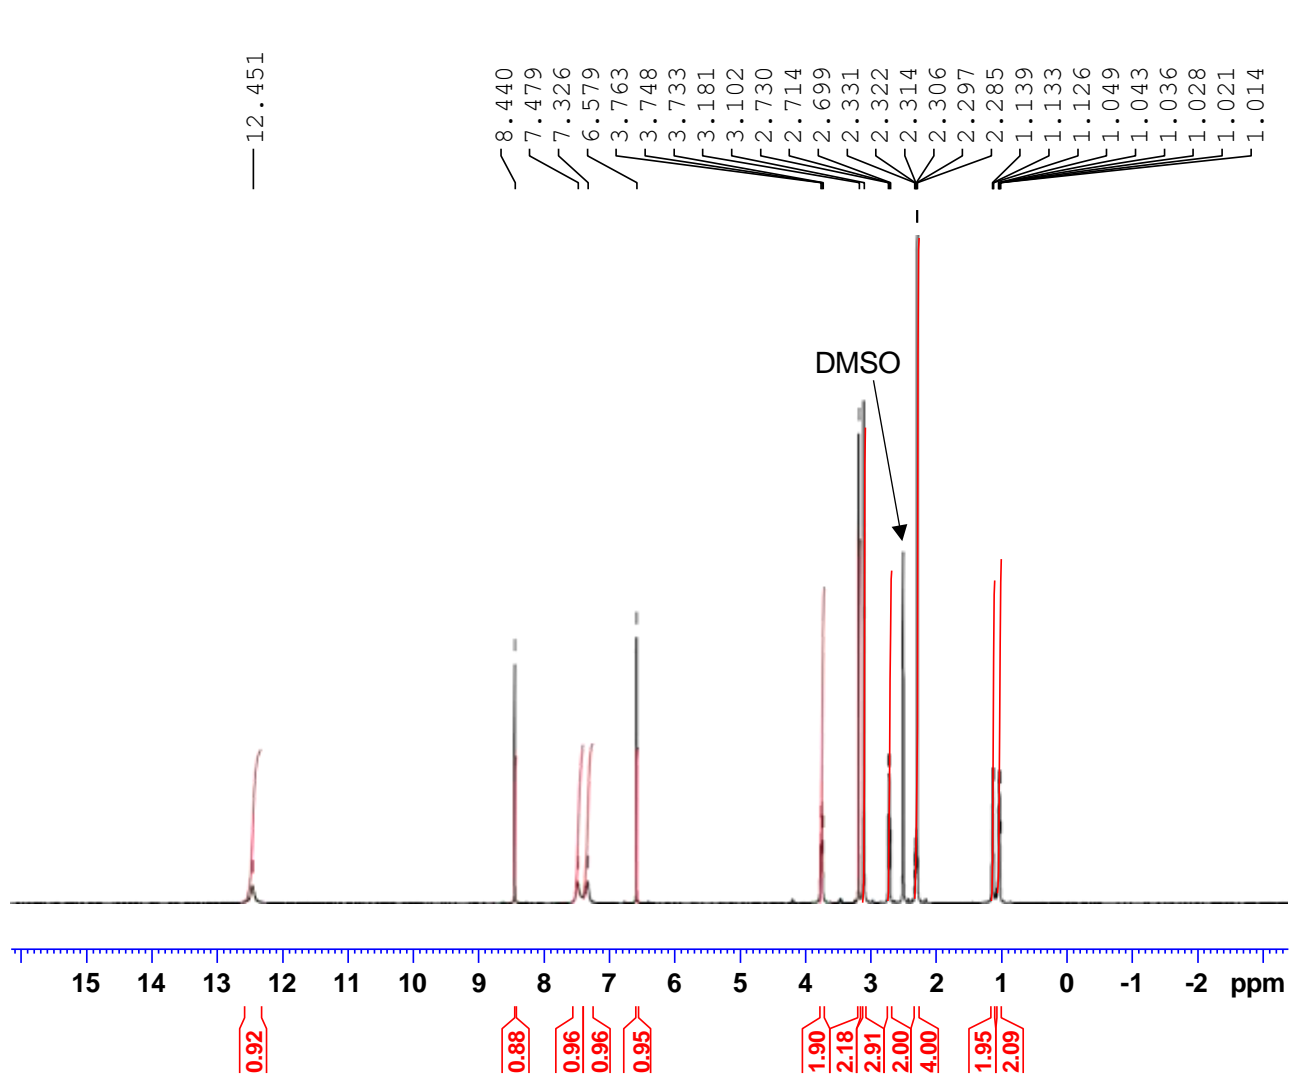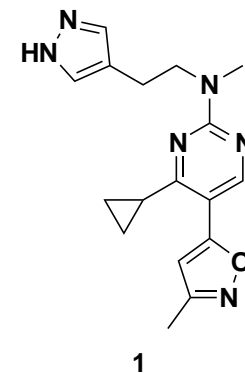

N-(2-(1H-pyrazol-4-yl)ethyl)-4-cyclopropyl-N-methyl-5-(3-methylisoxazol-5-yl)pyrimidin-2-amine

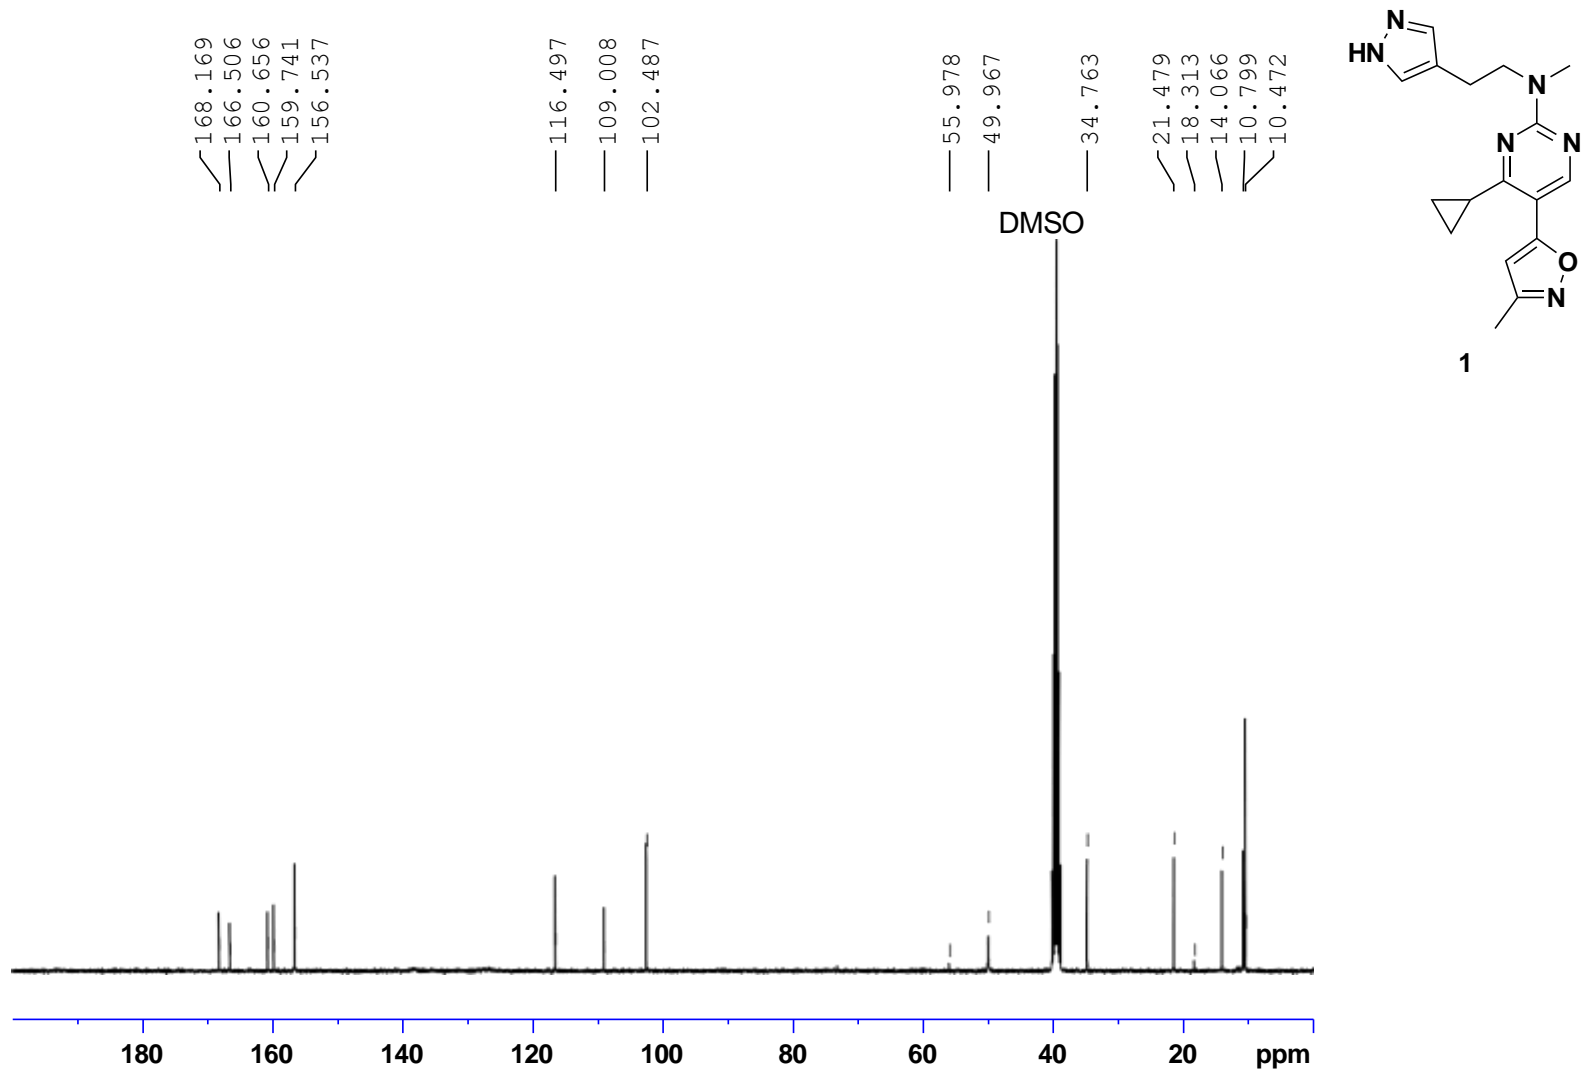

# Analysis Report

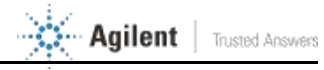

## Sample Information

|                       |              |                           |                                                                      |
|-----------------------|--------------|---------------------------|----------------------------------------------------------------------|
| <b>Name</b>           | LD-007-23-5  | <b>Data File Path</b>     | D:\MassHunter\Data\Louise\LD-007-23-5.d                              |
| <b>Sample ID</b>      |              | <b>Acq. Time (Local)</b>  | 1/15/2024 9:04:56 AM (UTC-06:00)                                     |
| <b>Instrument</b>     | Instrument 1 | <b>Method Path (Acq)</b>  | D:\MassHunter\Methods\SR\Shafikur_HPLC_method\Shafikur_HPLC_method.m |
| <b>MS Type</b>        | TOF          | <b>Version (Acq SW)</b>   | 6200 series TOF/6500 series Q-TOF 10.1 (48.0)                        |
| <b>Inj. Vol. (ul)</b> | 10           | <b>IRM Status</b>         | All ions missed                                                      |
| <b>Position</b>       | P1-A1        | <b>Method Path (DA)</b>   |                                                                      |
| <b>Plate Pos.</b>     |              | <b>Target Source Path</b> |                                                                      |
| <b>Operator</b>       |              | <b>Result Summary</b>     |                                                                      |

## Sample Chromatograms

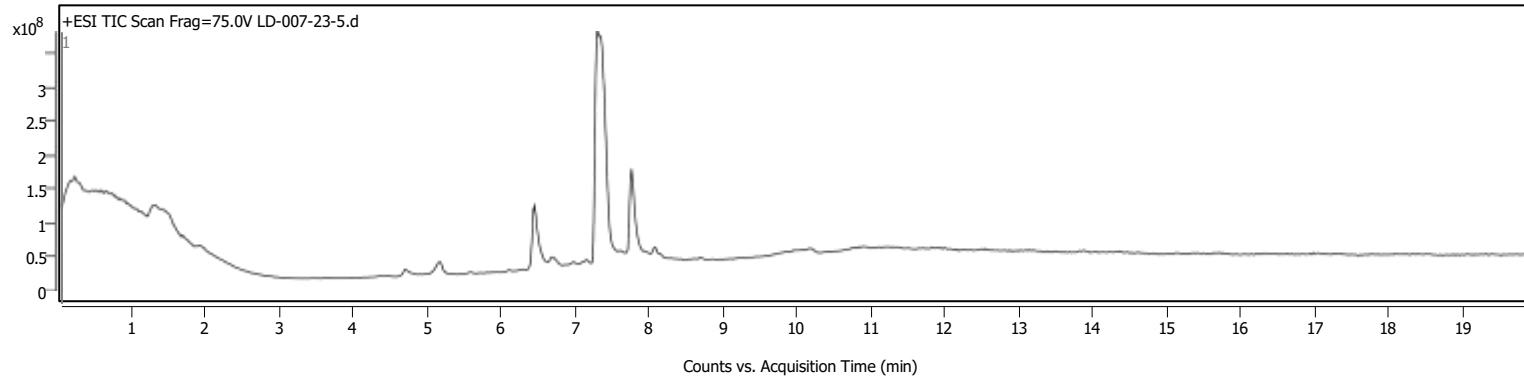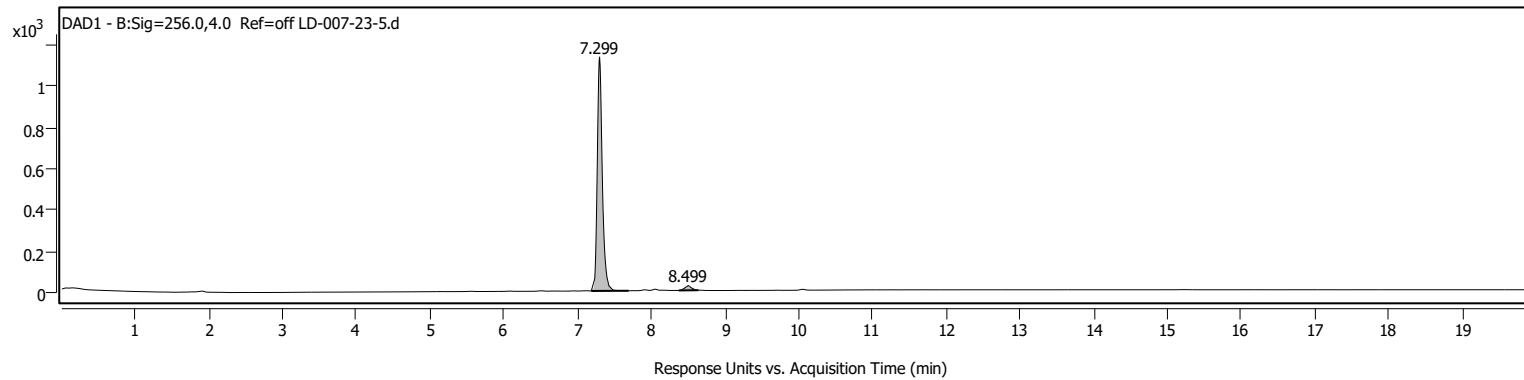

### Chromatogram Peaks

| Peak | Start | RT    | End   | Height | Area | Area % | SNR |
|------|-------|-------|-------|--------|------|--------|-----|
| 1    | 7.186 | 7.299 | 7.693 | 1138   | 5409 | 100.00 |     |
| 2    | 8.373 | 8.499 | 8.639 | 23     | 134  | 2.47   |     |

MassHunter Qual 10.0  
(End of Report)

# User Spectrum Plot Report

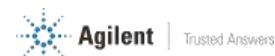

|                |               |              |                           |            |                 |                   |                                     |
|----------------|---------------|--------------|---------------------------|------------|-----------------|-------------------|-------------------------------------|
| Name           | LD-007-23-5   | Rack Pos.    |                           | Instrument | Instrument 1    | Operator          |                                     |
| Inj. Vol. (ul) | 2             | Plate Pos.   |                           | IRM Status | All ions missed |                   |                                     |
| Data File      | LD-007-23-4.d | Method (Acq) | Shafikur_HRMS<br>method.m | Comment    |                 | Acq. Time (Local) | 1/15/2024 9:28:43 AM<br>(UTC-06:00) |

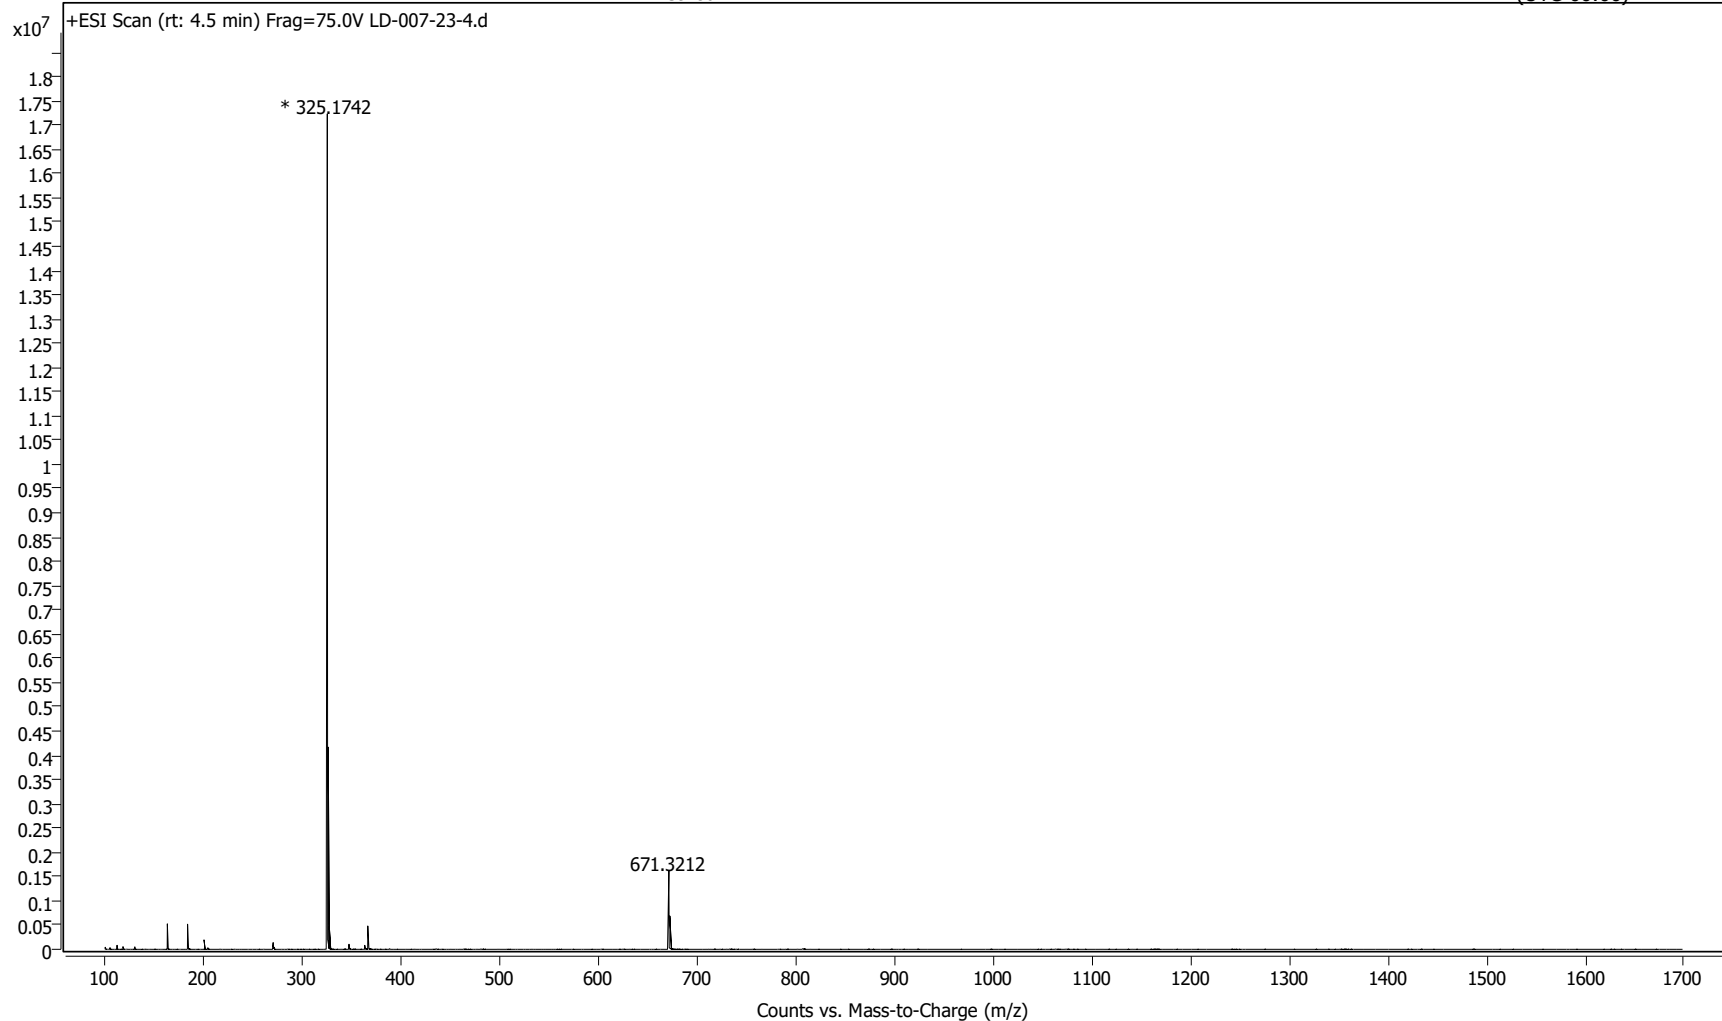

5-(4-cyclopropyl-2-(methylthio)pyrimidin-5-yl)-3-methylisoxazole

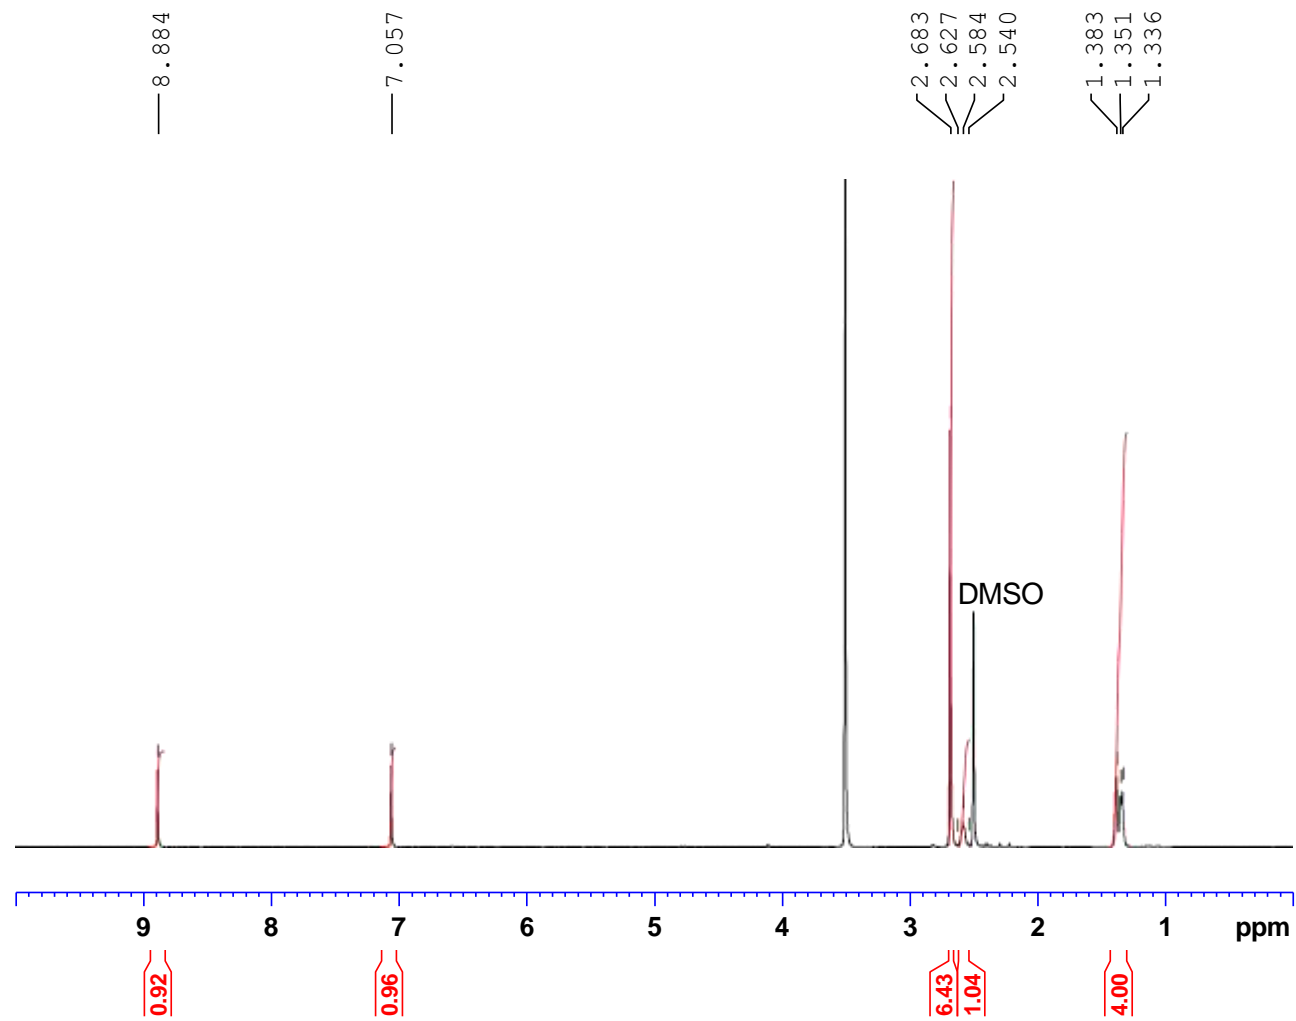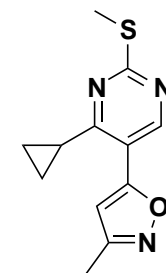

14a

5-(4-cyclopropyl-2-(methylthio)pyrimidin-5-yl)-3-methylisoxazole

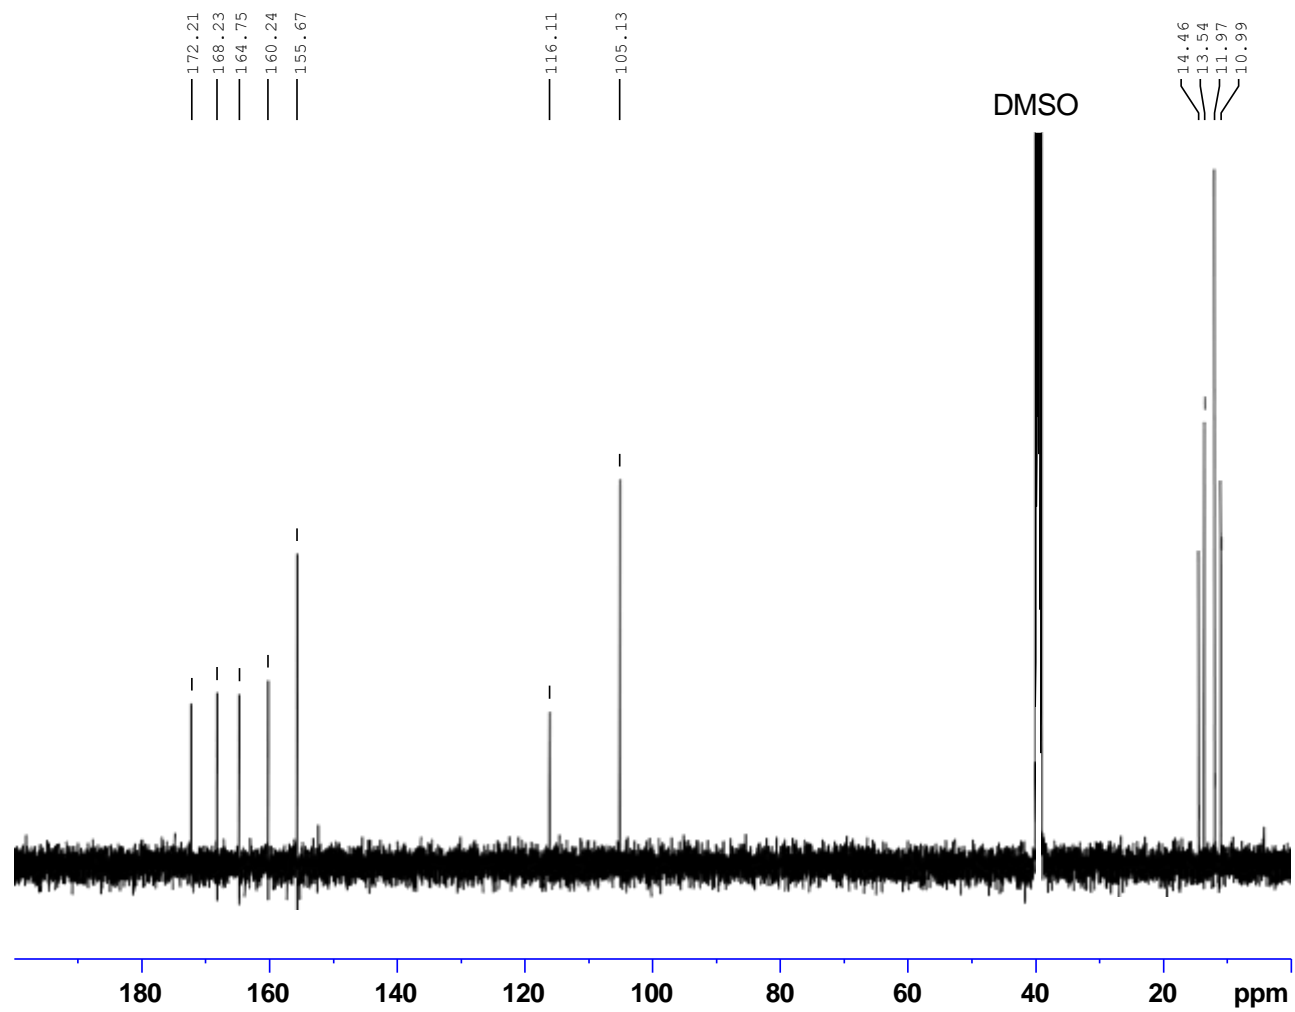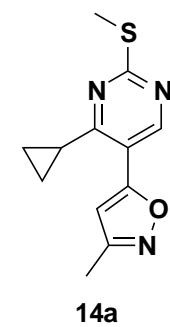

5-(4-cyclopropyl-2-methoxypyrimidin-5-yl)-3-methylisoxazole

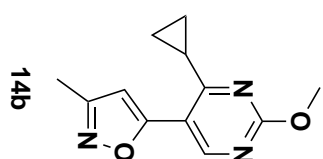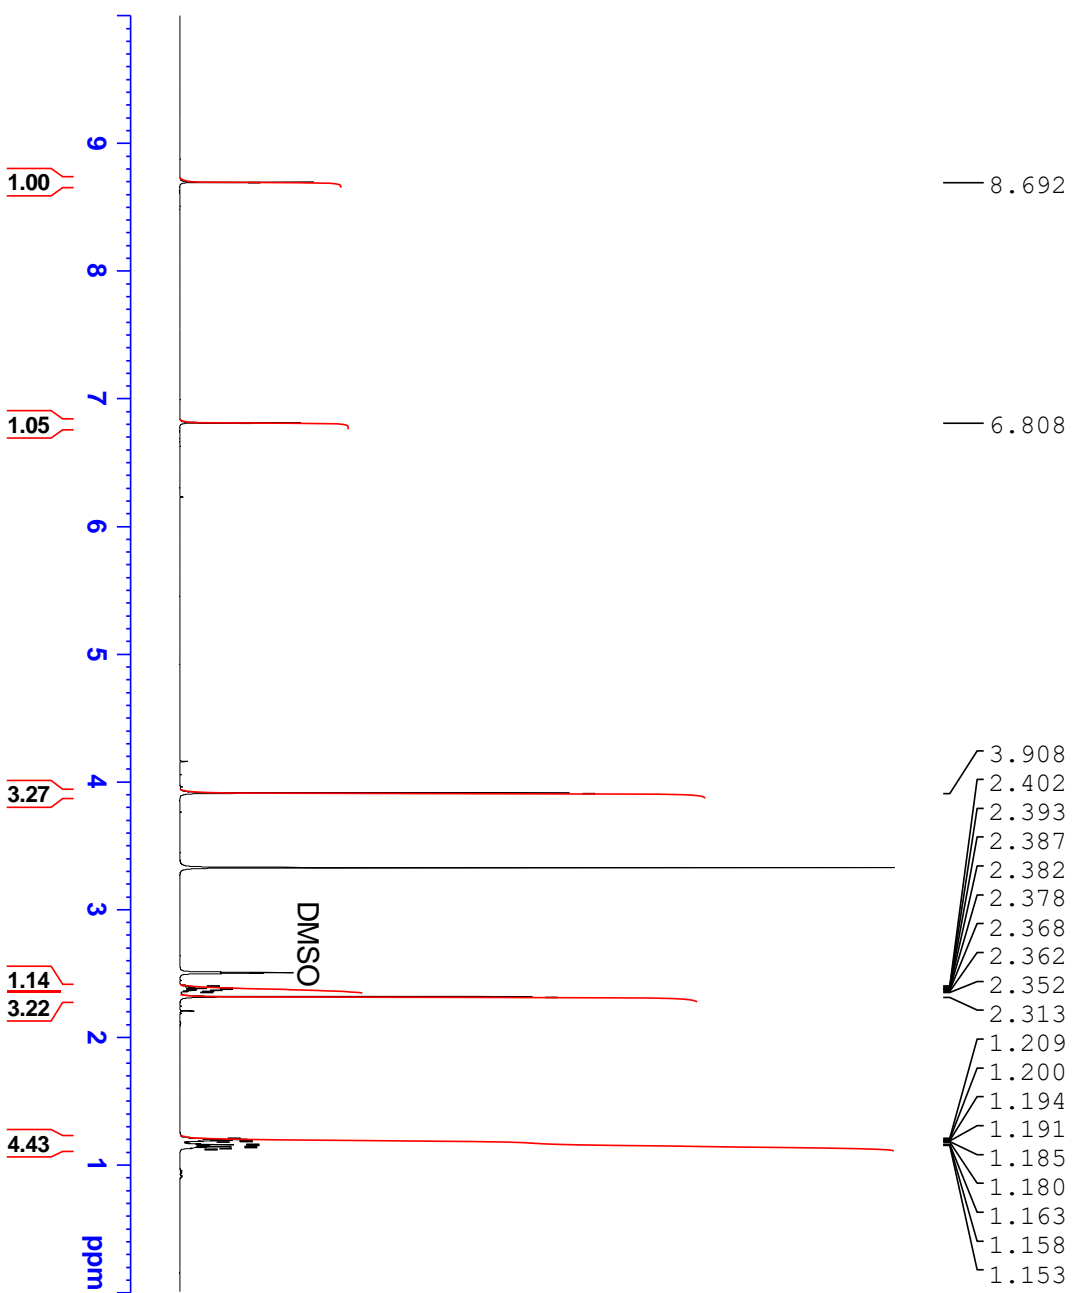



5-(4-cyclopropyl-2-methoxypyrimidin-5-yl)-3-methylisoxazole

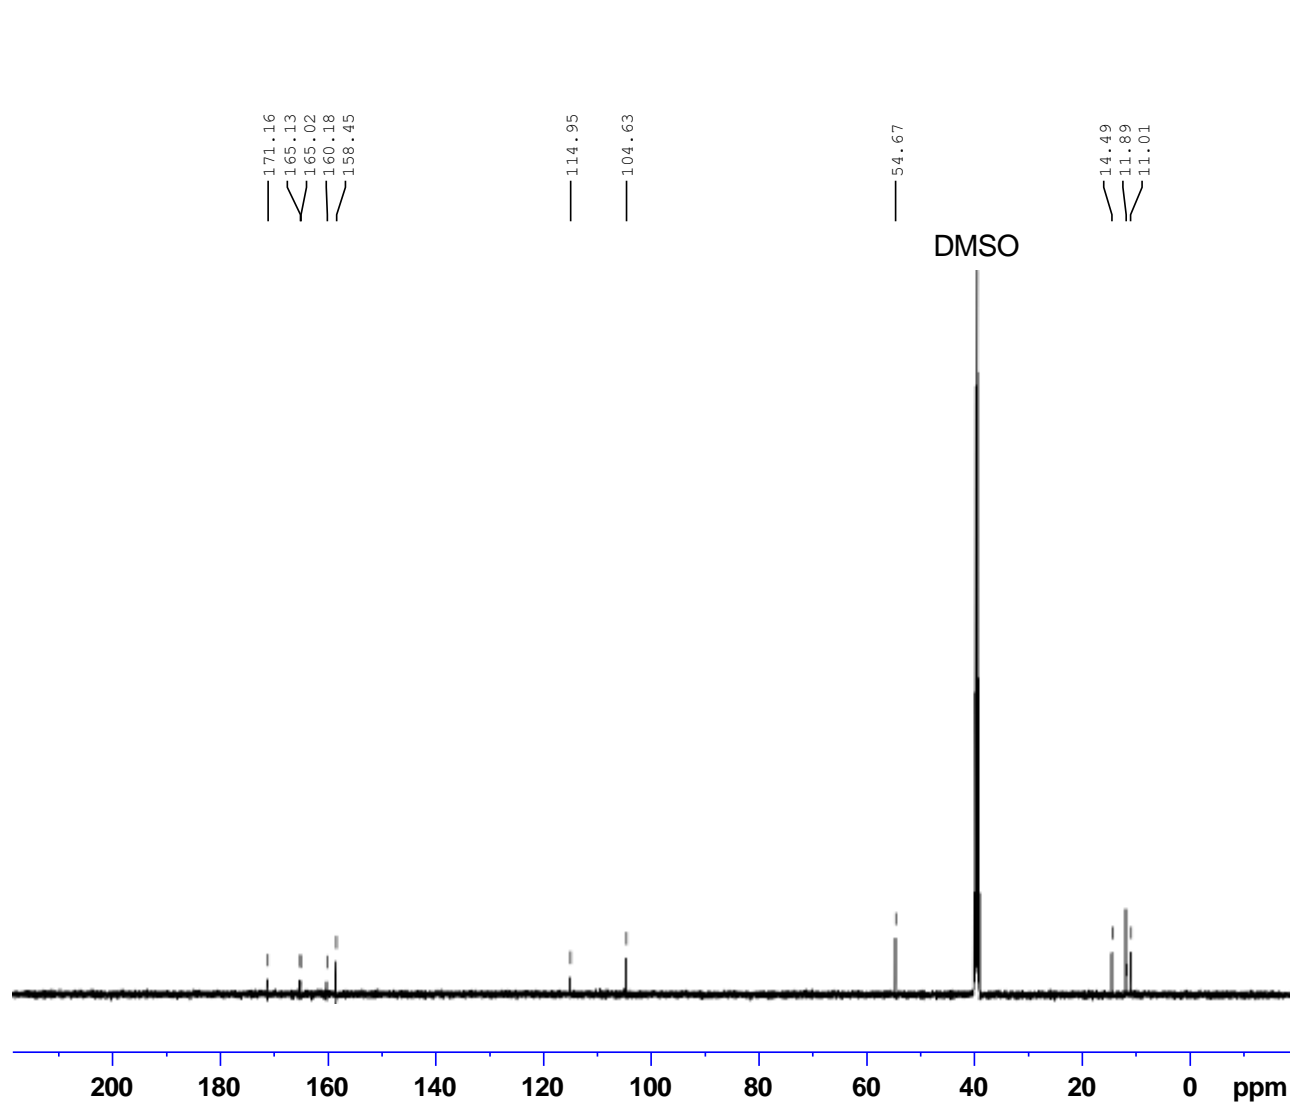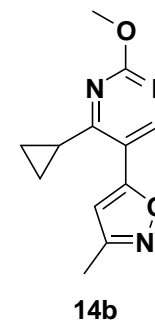

# Analysis Report

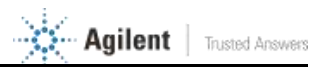

## Sample Information

|                       |              |                           |                                                                      |
|-----------------------|--------------|---------------------------|----------------------------------------------------------------------|
| <b>Name</b>           | EA-001-5     | <b>Data File Path</b>     | D:\MassHunter\Data\Louise\EA-001-5-HPLC.d                            |
| <b>Sample ID</b>      |              | <b>Acq. Time (Local)</b>  | 1/17/2024 11:51:42 AM (UTC-06:00)                                    |
| <b>Instrument</b>     | Instrument 1 | <b>Method Path (Acq)</b>  | D:\MassHunter\Methods\SR\Shafikur_HPLC method\Shafikur_HPLC method.m |
| <b>MS Type</b>        | TOF          | <b>Version (Acq SW)</b>   | 6200 series TOF/6500 series Q-TOF 10.1 (48.0)                        |
| <b>Inj. Vol. (ul)</b> | 10           | <b>IRM Status</b>         | All ions missed                                                      |
| <b>Position</b>       | P1-A4        | <b>Method Path (DA)</b>   |                                                                      |
| <b>Plate Pos.</b>     |              | <b>Target Source Path</b> |                                                                      |
| <b>Operator</b>       |              | <b>Result Summary</b>     |                                                                      |

## Sample Chromatograms

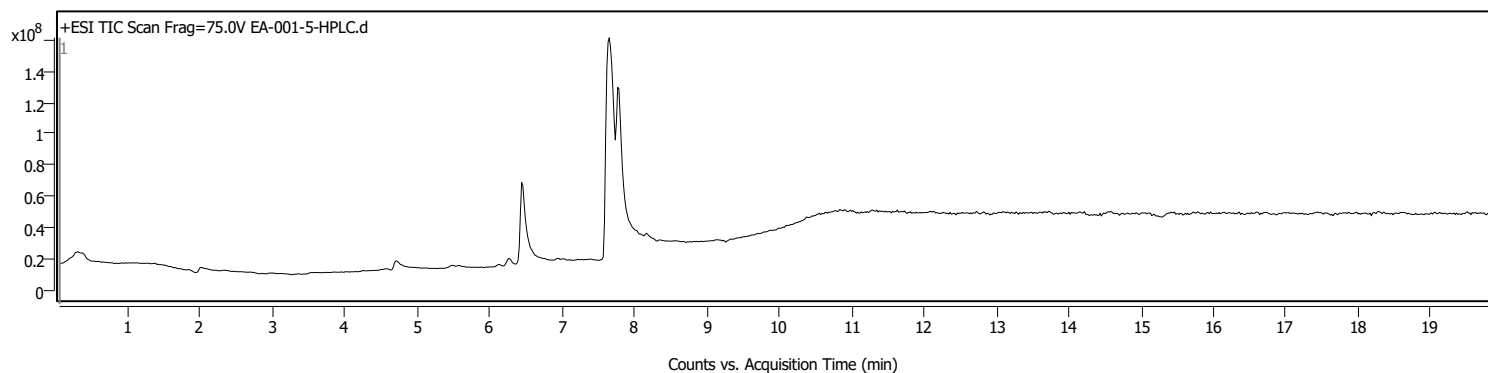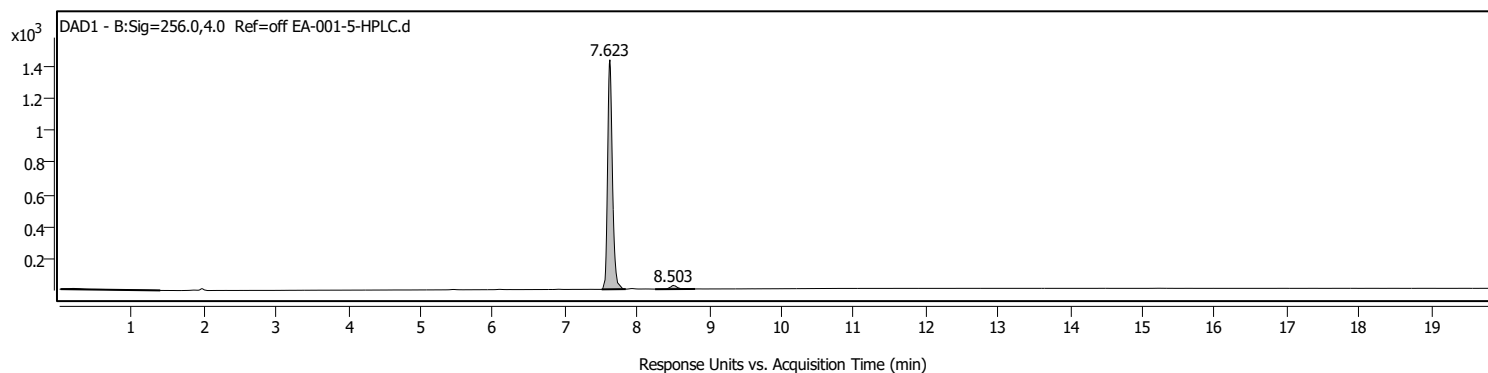

### Chromatogram Peaks

| Peak | Start | RT    | End   | Height | Area | Area % | SNR |
|------|-------|-------|-------|--------|------|--------|-----|
| 1    | 0.016 | 0.190 | 1.396 | 5      | 123  | 1.88   |     |
| 2    | 7.510 | 7.623 | 7.843 | 1429   | 6576 | 100.00 |     |
| 3    | 8.250 | 8.503 | 8.803 | 22     | 136  | 2.07   |     |

MassHunter Qual 10.0  
(End of Report)

# User Spectrum Plot Report

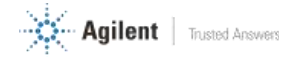

|                |                 |              |                           |            |                 |                   |                                      |
|----------------|-----------------|--------------|---------------------------|------------|-----------------|-------------------|--------------------------------------|
| Name           | EA-001-5        | Rack Pos.    |                           | Instrument | Instrument 1    | Operator          |                                      |
| Inj. Vol. (ul) | 2               | Plate Pos.   |                           | IRM Status | All ions missed |                   |                                      |
| Data File      | EA-001-5-HRMS.d | Method (Acq) | Shafikur_HRMS<br>method.m | Comment    |                 | Acq. Time (Local) | 1/17/2024 12:15:26<br>PM (UTC-06:00) |

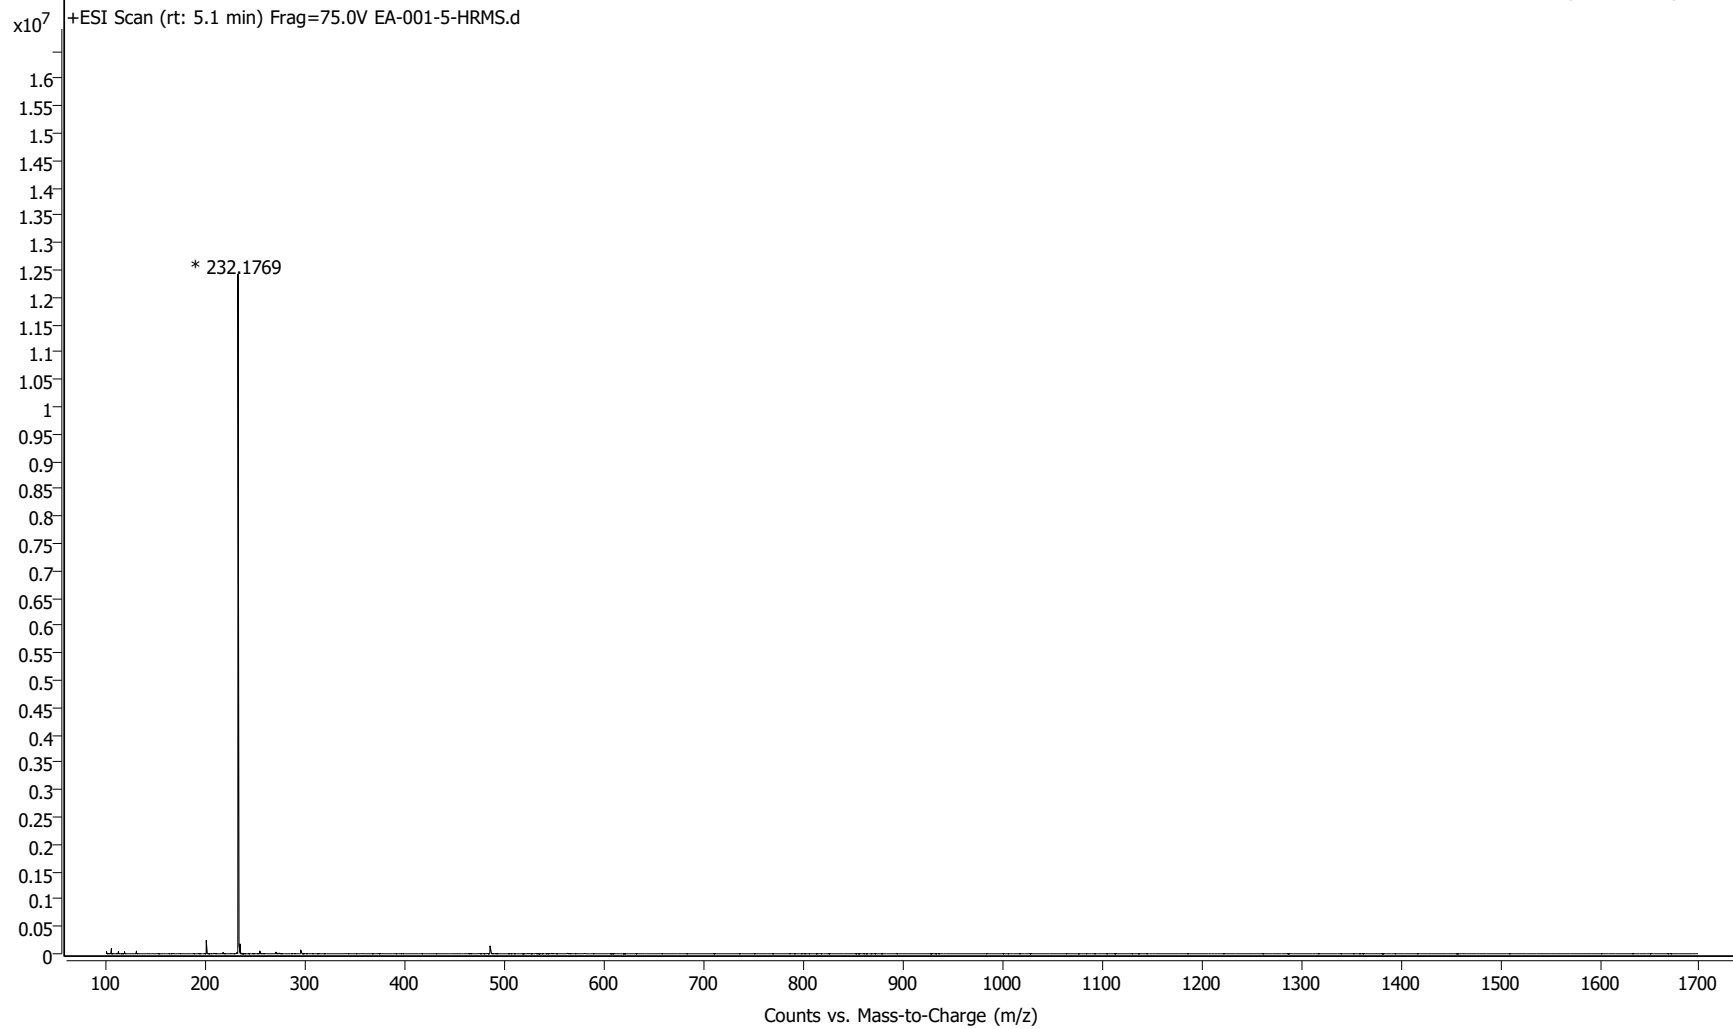

4-cyclopropyl-5-(3-methylisoxazol-5-yl)pyrimidin-2-amine

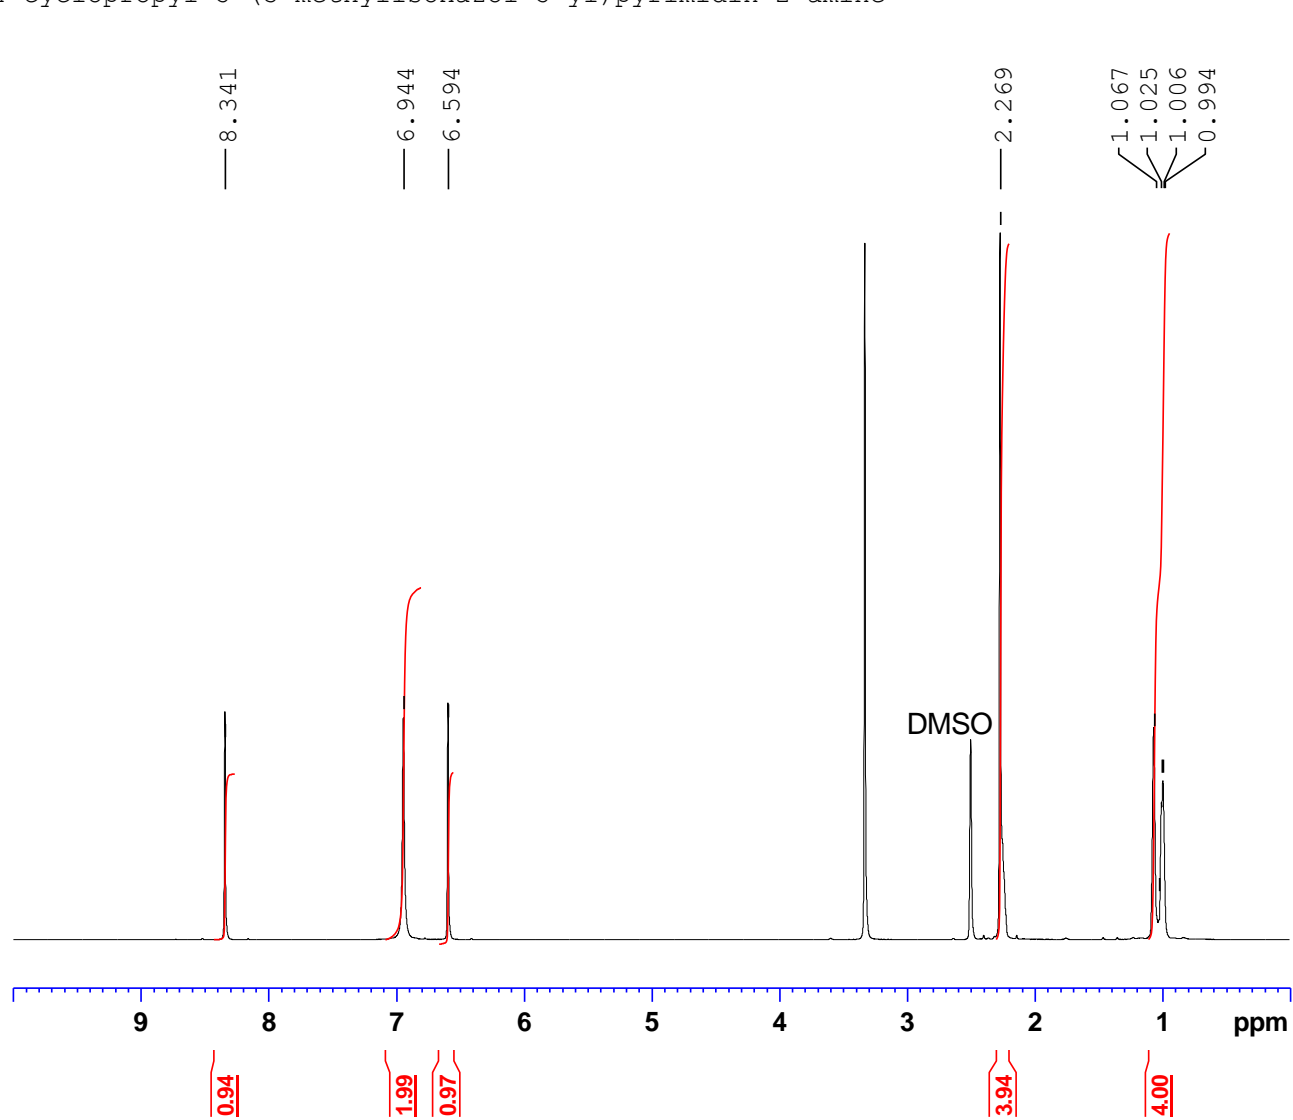

4-cyclopropyl-5-(3-methylisoxazol-5-yl)pyrimidin-2-amine

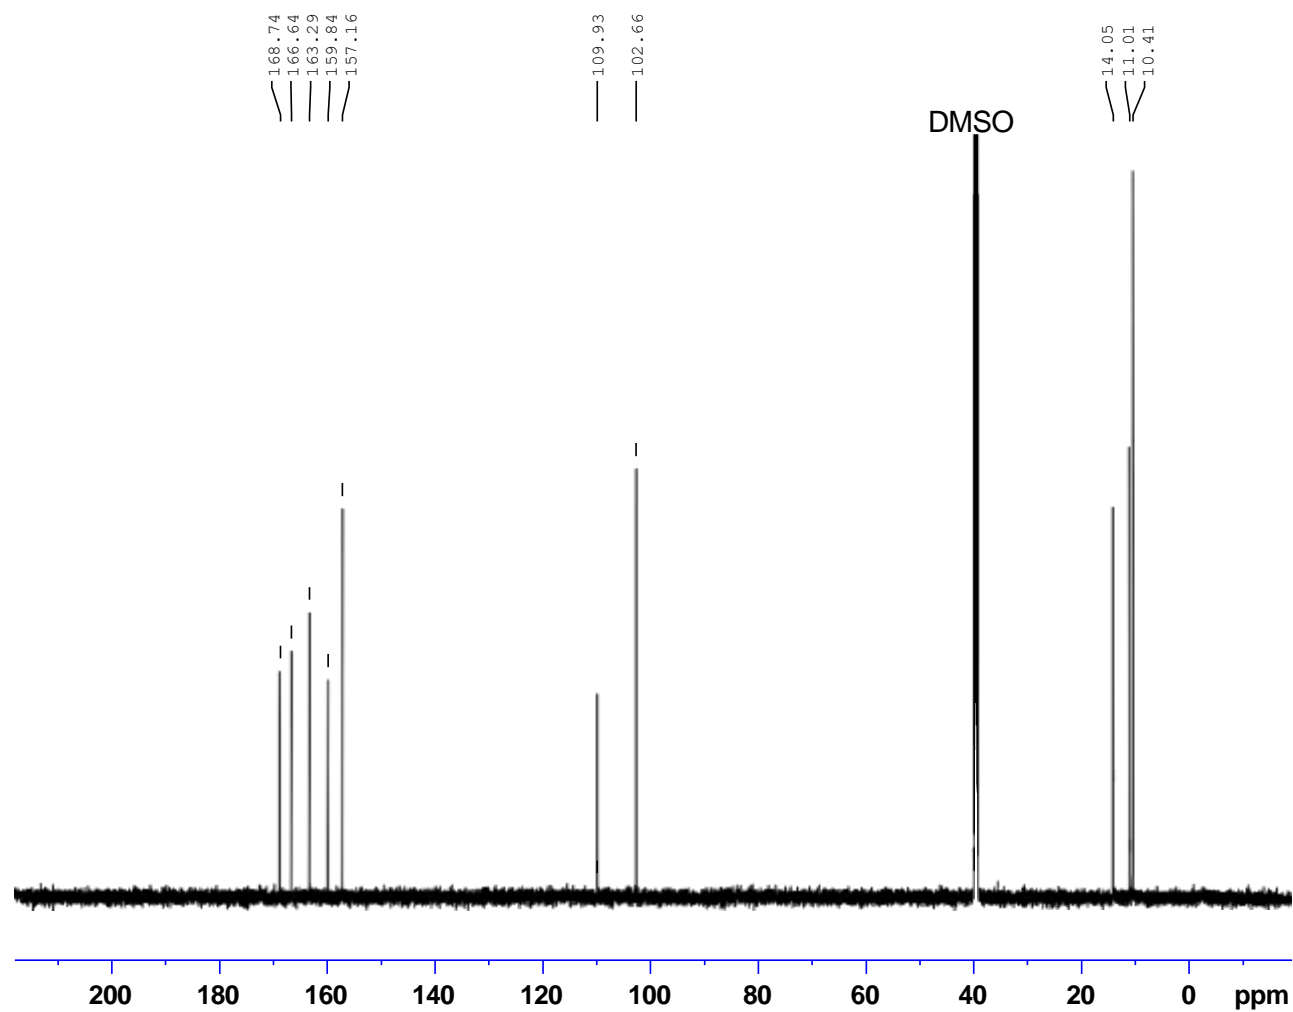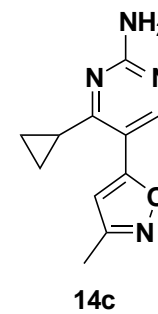

# Analysis Report

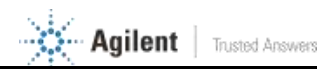

## Sample Information

|                       |              |                           |                                                                      |
|-----------------------|--------------|---------------------------|----------------------------------------------------------------------|
| <b>Name</b>           | ld-001-28    | <b>Data File Path</b>     | D:\MassHunter\Data\Louise\LD-001-28-HPLC-.d                          |
| <b>Sample ID</b>      |              | <b>Acq. Time (Local)</b>  | 1/17/2024 11:16:10 AM (UTC-06:00)                                    |
| <b>Instrument</b>     | Instrument 1 | <b>Method Path (Acq)</b>  | D:\MassHunter\Methods\SR\Shafikur_HPLC_method\Shafikur_HPLC_method.m |
| <b>MS Type</b>        | TOF          | <b>Version (Acq SW)</b>   | 6200 series TOF/6500 series Q-TOF 10.1 (48.0)                        |
| <b>Inj. Vol. (ul)</b> | 10           | <b>IRM Status</b>         | All ions missed                                                      |
| <b>Position</b>       | P1-A3        | <b>Method Path (DA)</b>   |                                                                      |
| <b>Plate Pos.</b>     |              | <b>Target Source Path</b> |                                                                      |
| <b>Operator</b>       |              | <b>Result Summary</b>     |                                                                      |

## Sample Chromatograms

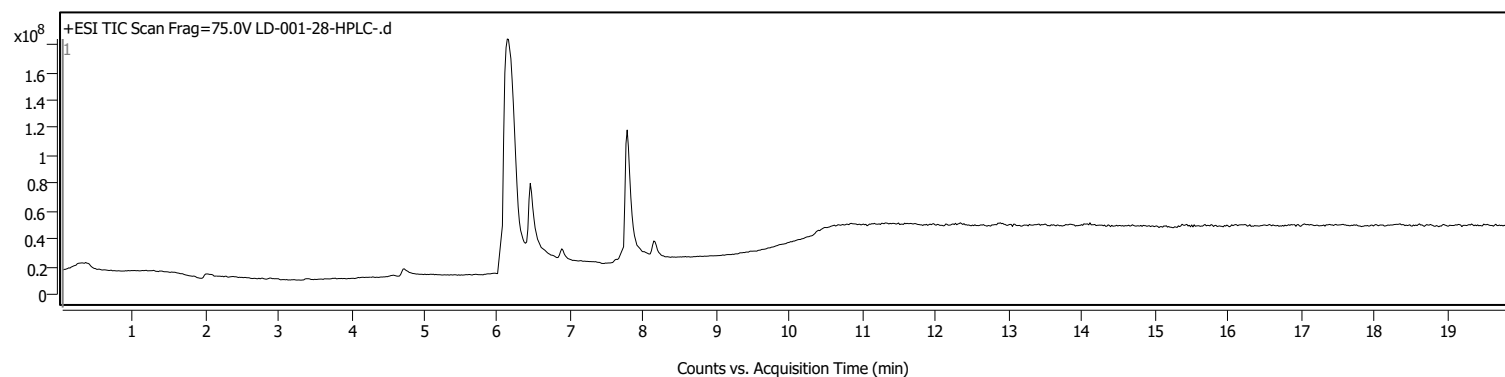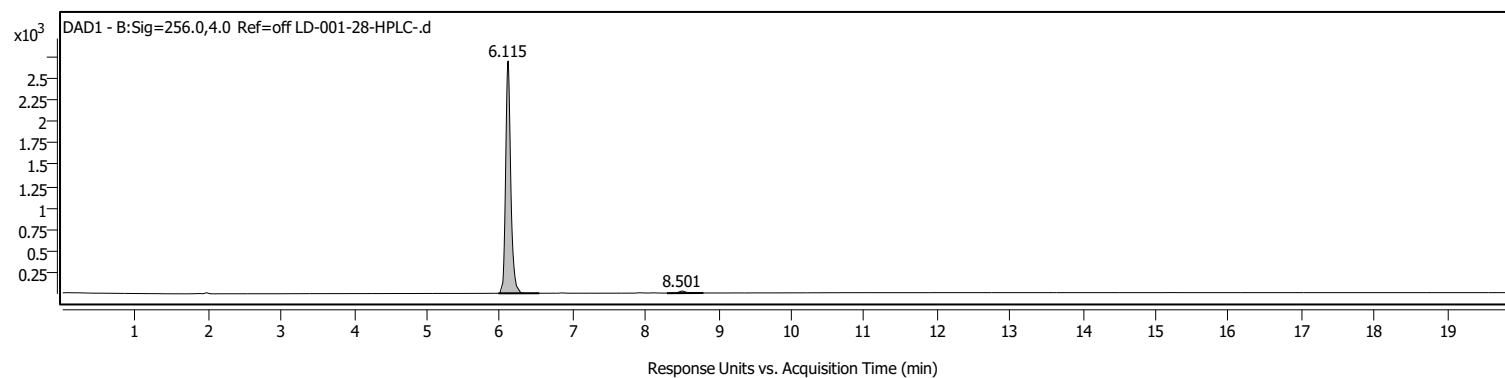

### Chromatogram Peaks

| Peak | Start | RT    | End   | Height | Area  | Area % | SNR |
|------|-------|-------|-------|--------|-------|--------|-----|
| 1    | 5.981 | 6.115 | 6.541 | 2693   | 13060 | 100.00 |     |
| 2    | 8.295 | 8.501 | 8.795 | 23     | 139   | 1.07   |     |

MassHunter Qual 10.0  
(End of Report)

# User Spectrum Plot Report

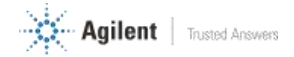

|                |                  |              |                           |            |                 |                   |                                      |
|----------------|------------------|--------------|---------------------------|------------|-----------------|-------------------|--------------------------------------|
| Name           | LD-001-28        | Rack Pos.    |                           | Instrument | Instrument 1    | Operator          |                                      |
| Inj. Vol. (ul) | 2                | Plate Pos.   |                           | IRM Status | All ions missed |                   |                                      |
| Data File      | LD-001-28-HRMS.d | Method (Acq) | Shafikur_HRMS<br>method.m | Comment    |                 | Acq. Time (Local) | 1/17/2024 11:39:54<br>AM (UTC-06:00) |

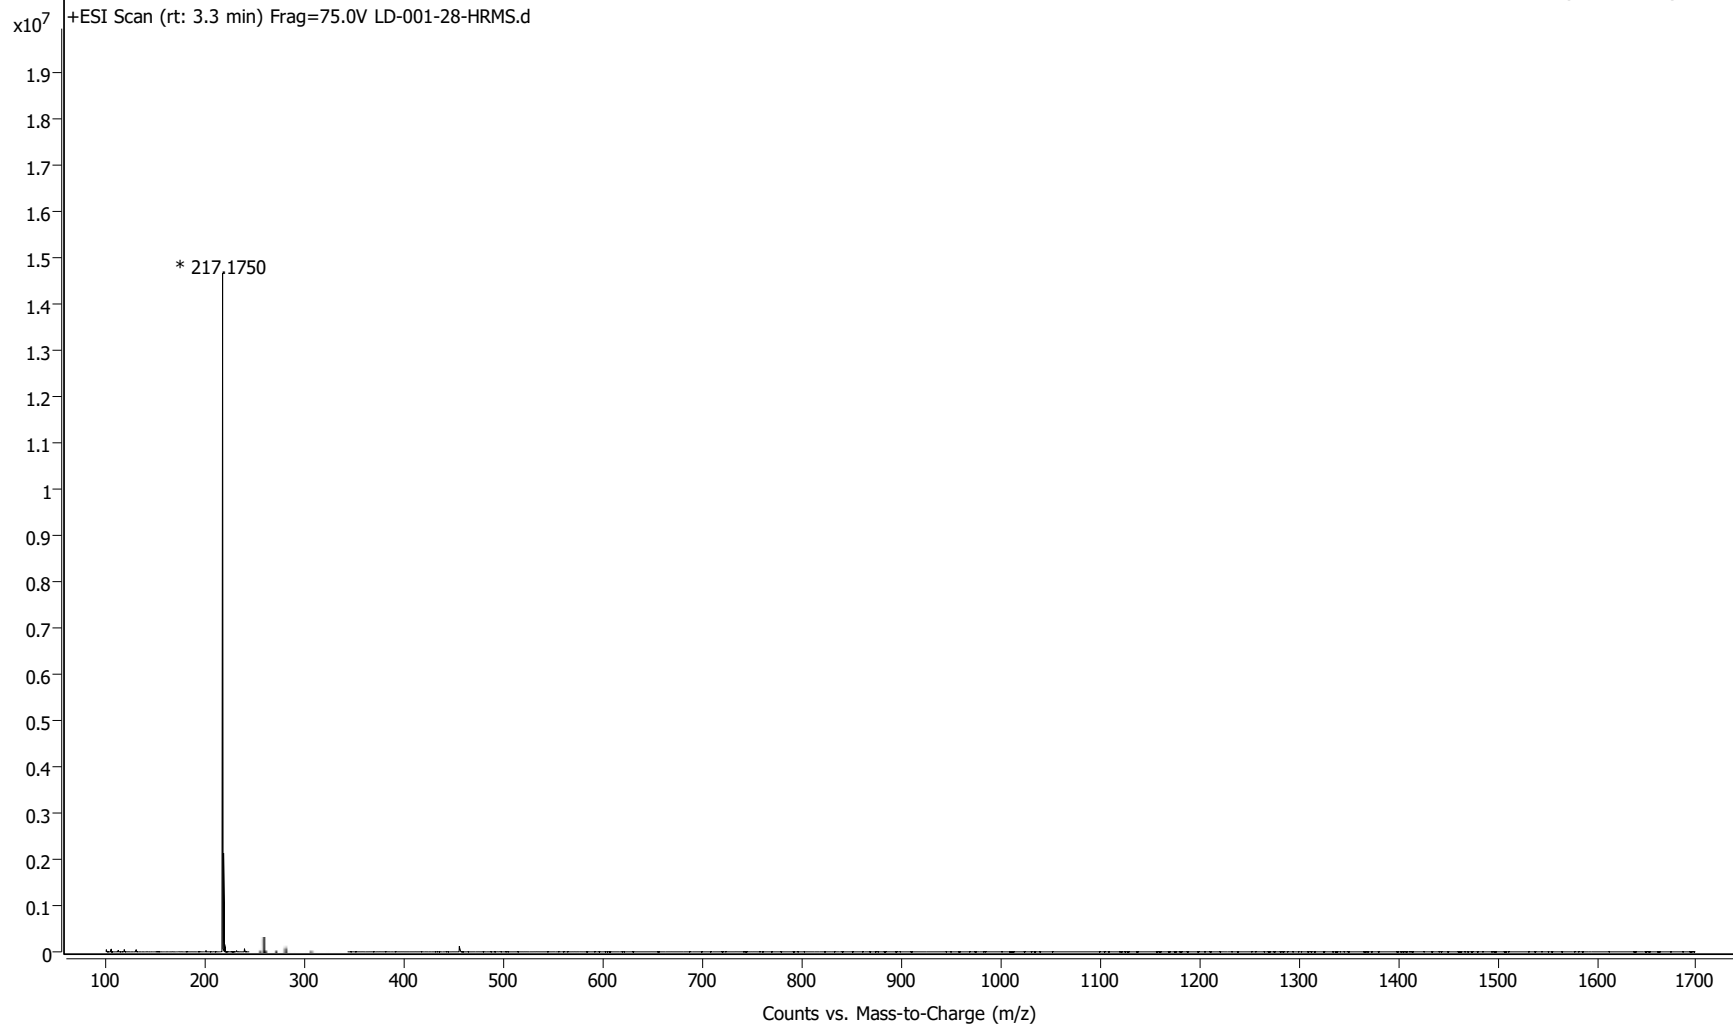

4-cyclopropyl-N-methyl-5-(3-methylisoxazol-5-yl)pyrimidin-2-amine

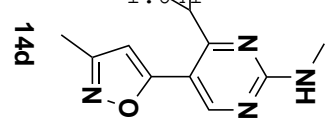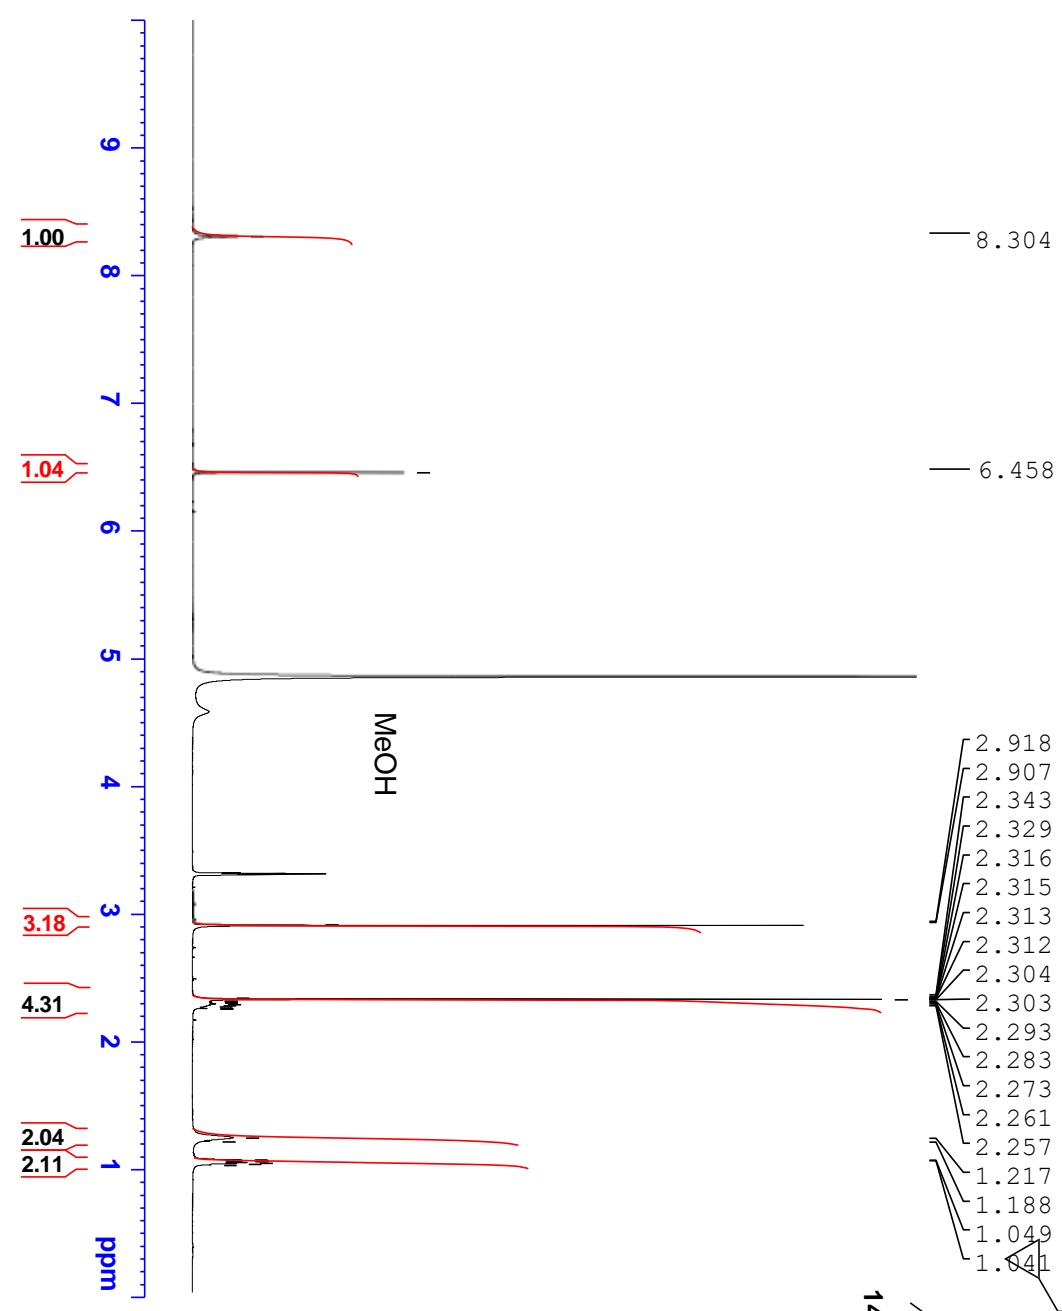



4-cyclopropyl-N-methyl-5-(3-methylisoxazol-5-yl)pyrimidin-2-amine

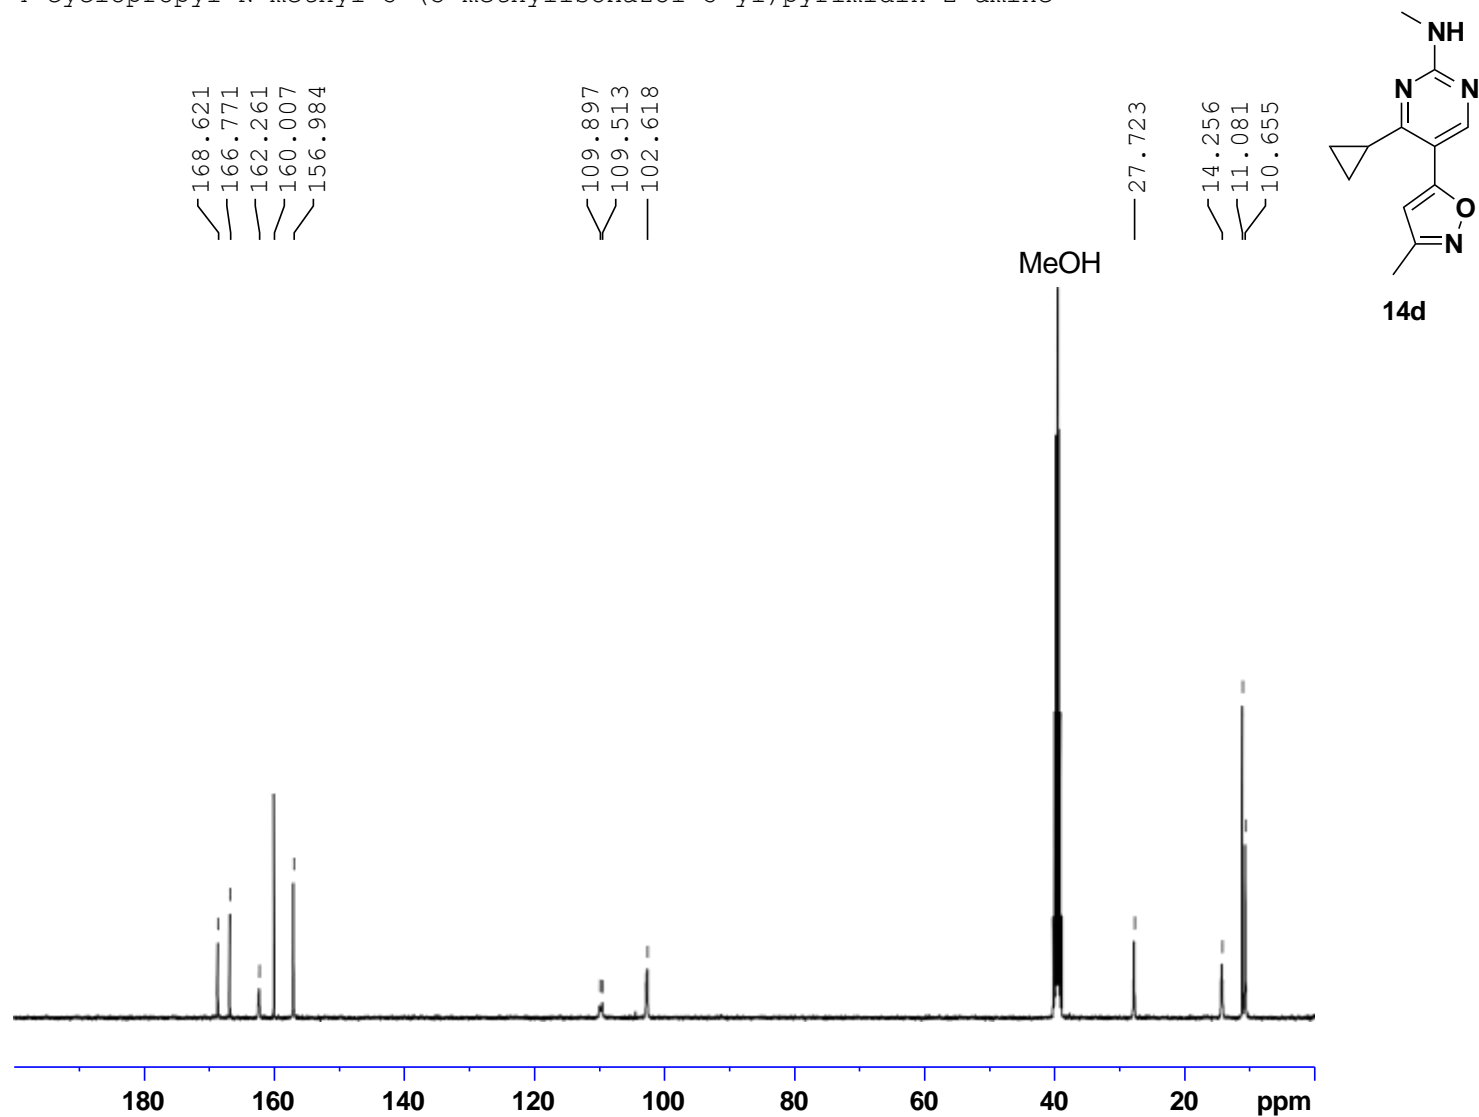

# Analysis Report

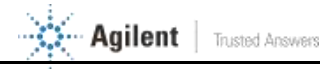

## Sample Information

|                       |              |                           |                                                                      |
|-----------------------|--------------|---------------------------|----------------------------------------------------------------------|
| <b>Name</b>           | ld-001-47    | <b>Data File Path</b>     | D:\MassHunter\Data\Louise\ld-001-47-hplc.d                           |
| <b>Sample ID</b>      |              | <b>Acq. Time (Local)</b>  | 1/17/2024 10:05:06 AM (UTC-06:00)                                    |
| <b>Instrument</b>     | Instrument 1 | <b>Method Path (Acq)</b>  | D:\MassHunter\Methods\SR\Shafikur_HPLC_method\Shafikur_HPLC_method.m |
| <b>MS Type</b>        | TOF          | <b>Version (Acq SW)</b>   | 6200 series TOF/6500 series Q-TOF 10.1 (48.0)                        |
| <b>Inj. Vol. (ul)</b> | 10           | <b>IRM Status</b>         | All ions missed                                                      |
| <b>Position</b>       | P1-A1        | <b>Method Path (DA)</b>   |                                                                      |
| <b>Plate Pos.</b>     |              | <b>Target Source Path</b> |                                                                      |
| <b>Operator</b>       |              | <b>Result Summary</b>     |                                                                      |

## Sample Chromatograms

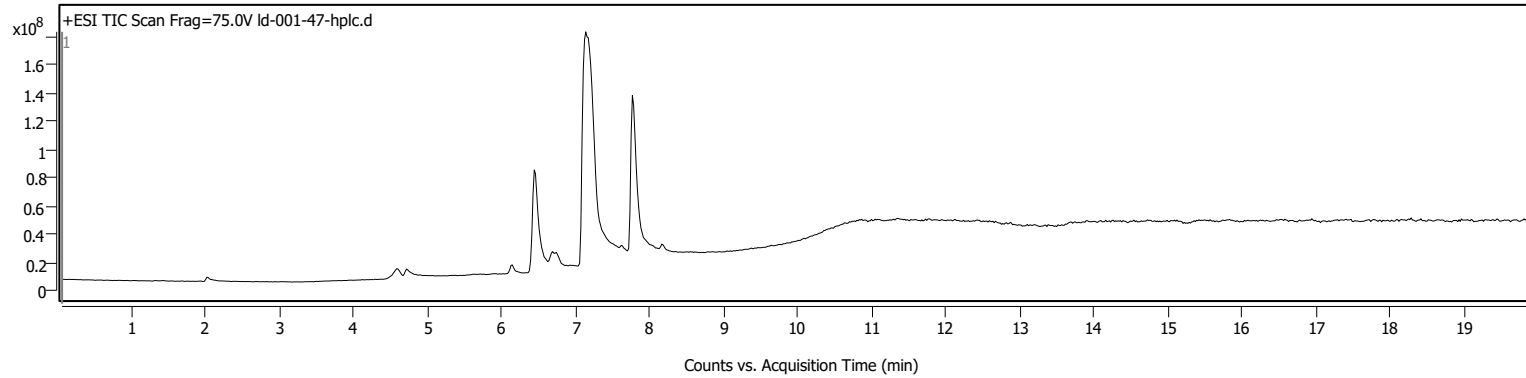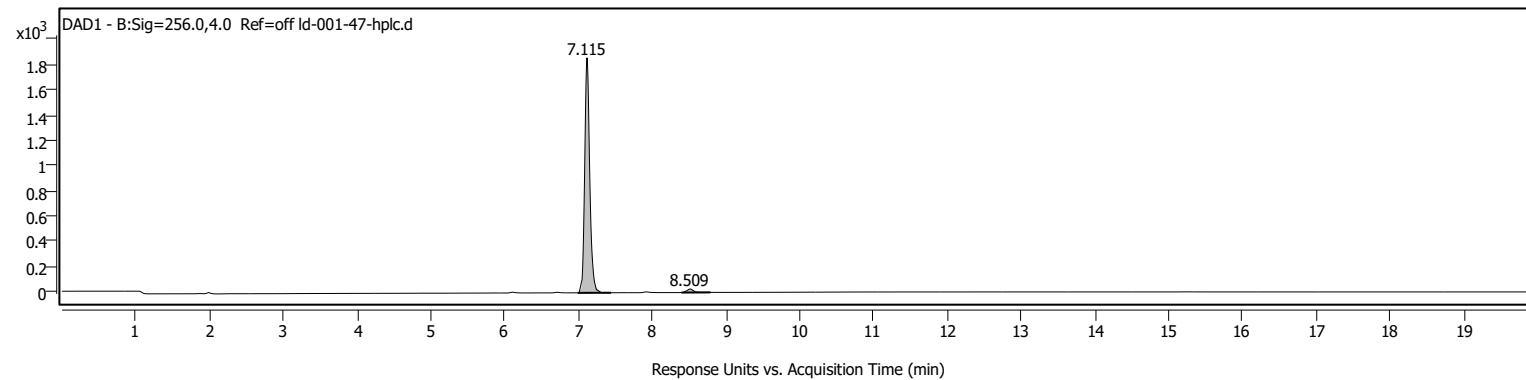

### Chromatogram Peaks

| Peak | Start | RT    | End   | Height | Area | Area % | SNR |
|------|-------|-------|-------|--------|------|--------|-----|
| 1    | 6.989 | 7.115 | 7.442 | 1861   | 8794 | 100.00 |     |
| 2    | 8.395 | 8.509 | 8.789 | 29     | 167  | 1.89   |     |

MassHunter Qual 10.0  
(End of Report)

# User Spectrum Plot Report

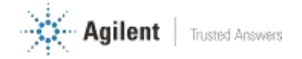

|                |                  |              |                           |            |                 |                   |                                      |
|----------------|------------------|--------------|---------------------------|------------|-----------------|-------------------|--------------------------------------|
| Name           | Id-001-47        | Rack Pos.    |                           | Instrument | Instrument 1    | Operator          |                                      |
| Inj. Vol. (ul) | 2                | Plate Pos.   |                           | IRM Status | All ions missed |                   |                                      |
| Data File      | Id-001-47-hrms.d | Method (Acq) | Shafikur_HRMS<br>method.m | Comment    |                 | Acq. Time (Local) | 1/17/2024 10:28:55<br>AM (UTC-06:00) |

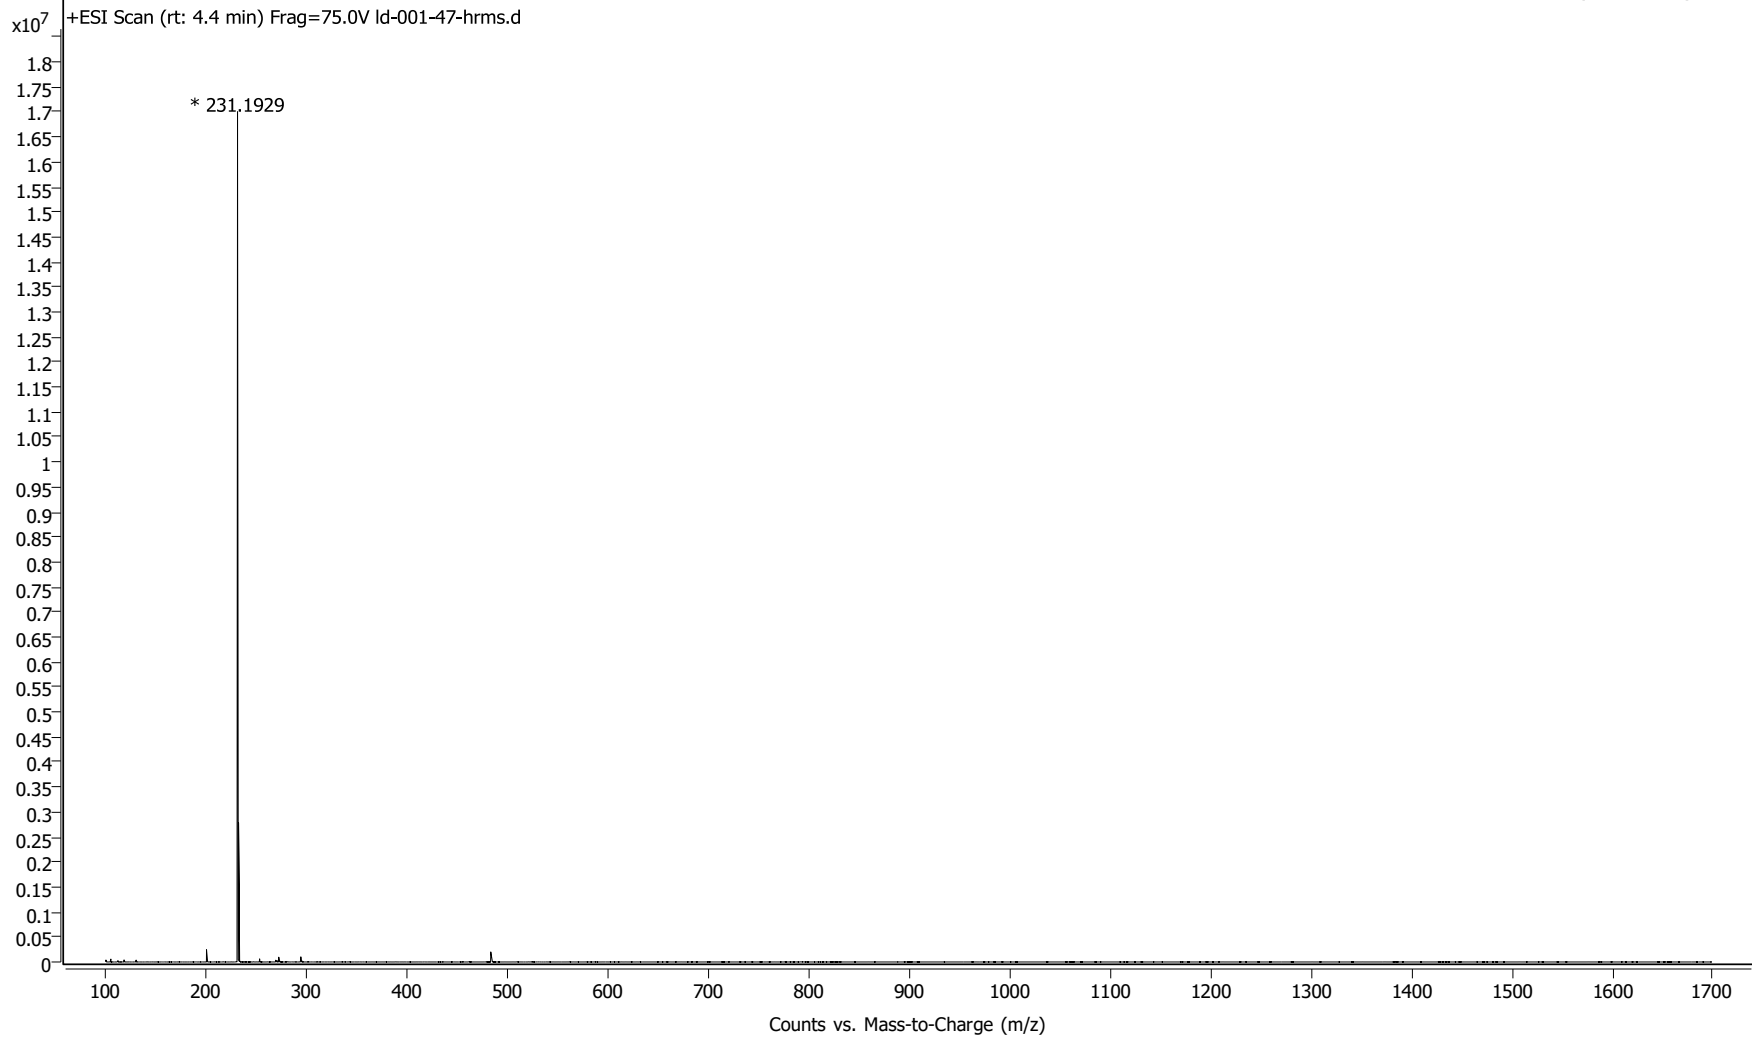

tert-butyl (4-cyclopropyl-5-(3-methylisoxazol-5-yl)pyrimidin-2-yl) carbamate

- 10.104
- 8.663
- 6.812
- 2.394
- 2.383
- 2.374
- 2.363
- 2.351
- 2.343
- 2.331
- 2.310
- 1.462
- 1.209
- 1.198
- 1.191
- 1.180
- 1.173
- 1.116

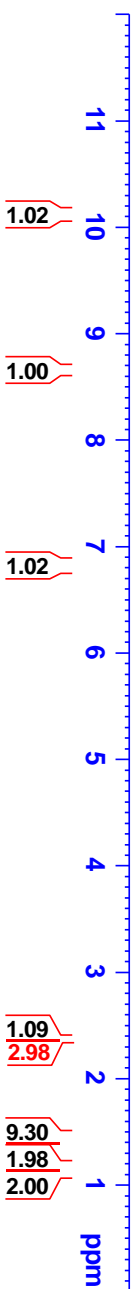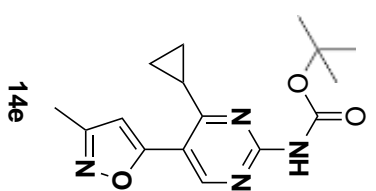

tert-butyl (4-cyclopropyl-5-(3-methylisoxazol-5-yl)pyrimidin-2-yl) carbamate

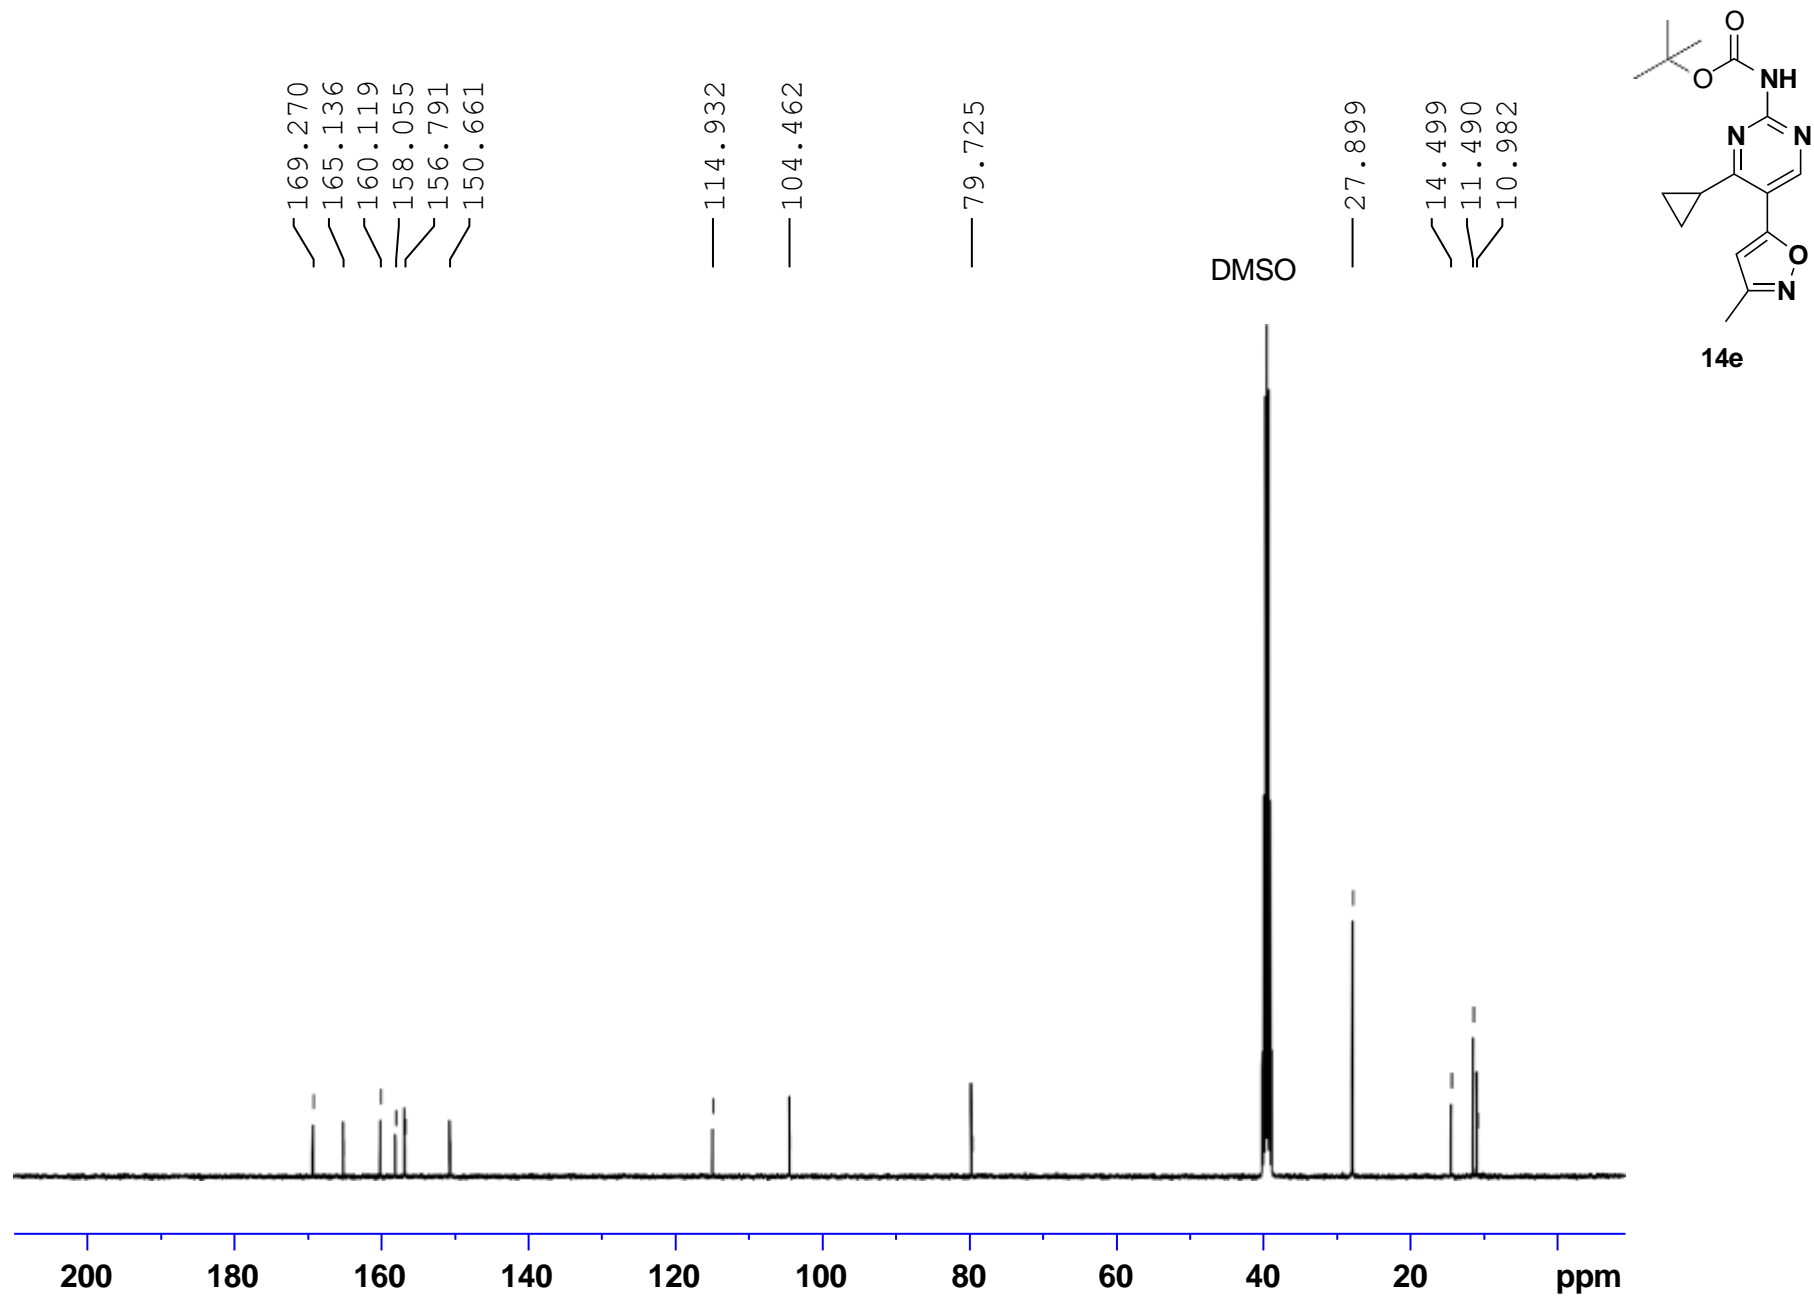

# Analysis Report

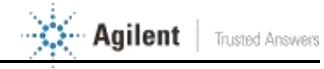

## Sample Information

|                       |              |                           |                                                                      |
|-----------------------|--------------|---------------------------|----------------------------------------------------------------------|
| <b>Name</b>           | ld-001-44    | <b>Data File Path</b>     | D:\MassHunter\Data\Louise\ld-001-44-hplc.d                           |
| <b>Sample ID</b>      |              | <b>Acq. Time (Local)</b>  | 1/17/2024 10:40:40 AM (UTC-06:00)                                    |
| <b>Instrument</b>     | Instrument 1 | <b>Method Path (Acq)</b>  | D:\MassHunter\Methods\SR\Shafikur_HPLC method\Shafikur_HPLC method.m |
| <b>MS Type</b>        | TOF          | <b>Version (Acq SW)</b>   | 6200 series TOF/6500 series Q-TOF 10.1 (48.0)                        |
| <b>Inj. Vol. (ul)</b> | 10           | <b>IRM Status</b>         | All ions missed                                                      |
| <b>Position</b>       | P1-A2        | <b>Method Path (DA)</b>   |                                                                      |
| <b>Plate Pos.</b>     |              | <b>Target Source Path</b> |                                                                      |
| <b>Operator</b>       |              | <b>Result Summary</b>     |                                                                      |

## Sample Chromatograms

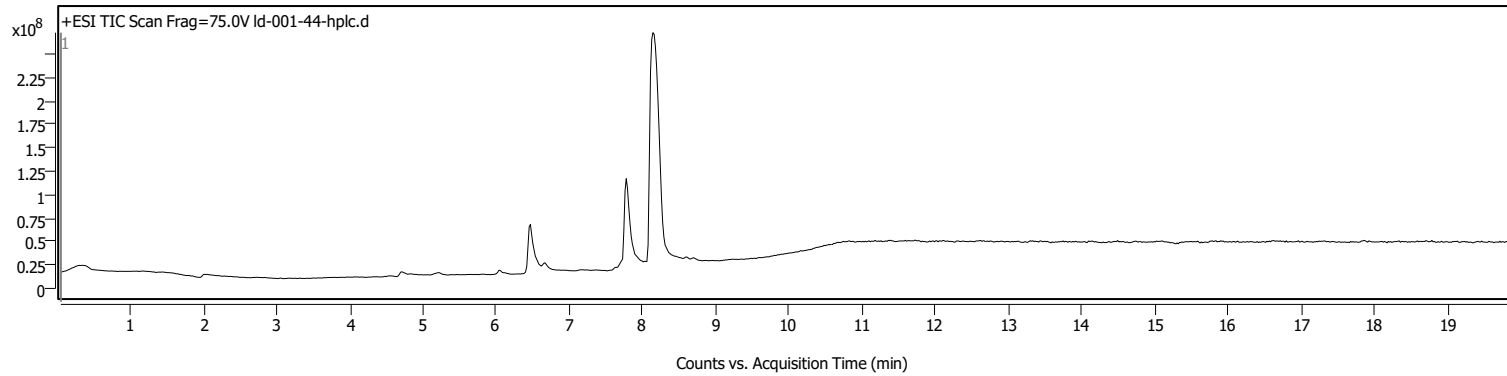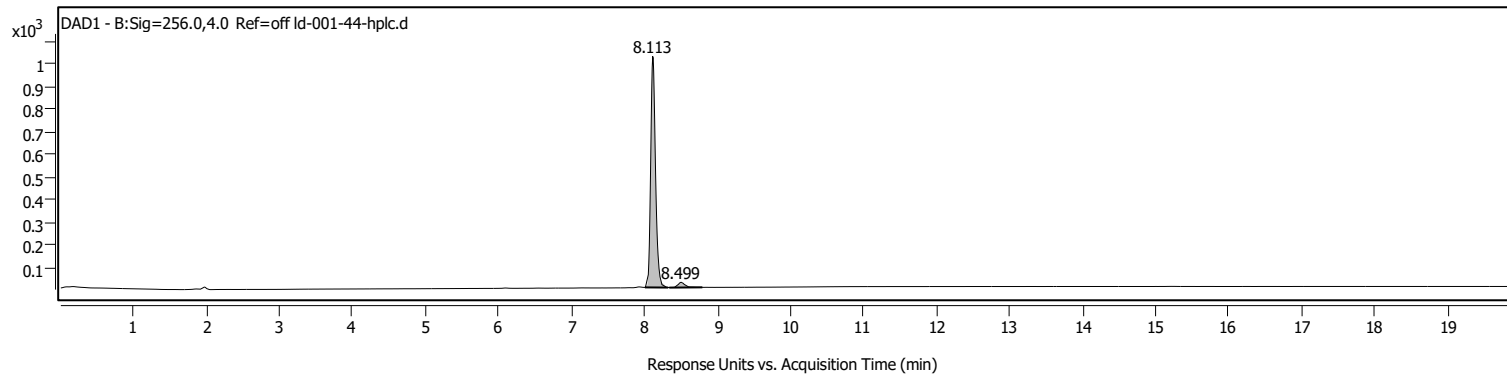

### Chromatogram Peaks

| Peak | Start | RT    | End   | Height | Area | Area % | SNR |
|------|-------|-------|-------|--------|------|--------|-----|
| 1    | 8.006 | 8.113 | 8.326 | 1020   | 4660 | 100.00 |     |
| 2    | 8.339 | 8.499 | 8.793 | 22     | 143  | 3.07   |     |

MassHunter Qual 10.0  
(End of Report)

# User Spectrum Plot Report

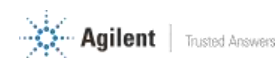

|                |                  |              |                           |                 |                                      |
|----------------|------------------|--------------|---------------------------|-----------------|--------------------------------------|
| Name           | ld-001-44        | Rack Pos.    | Instrument                | Instrument 1    | Operator                             |
| Inj. Vol. (ul) | 2                | Plate Pos.   | IRM Status                | All ions missed |                                      |
| Data File      | ld-001-44-hrms.d | Method (Acq) | Shafikur_HRMS<br>method.m |                 | Acq. Time (Local)                    |
|                |                  |              |                           |                 | 1/17/2024 11:04:25<br>AM (UTC-06:00) |

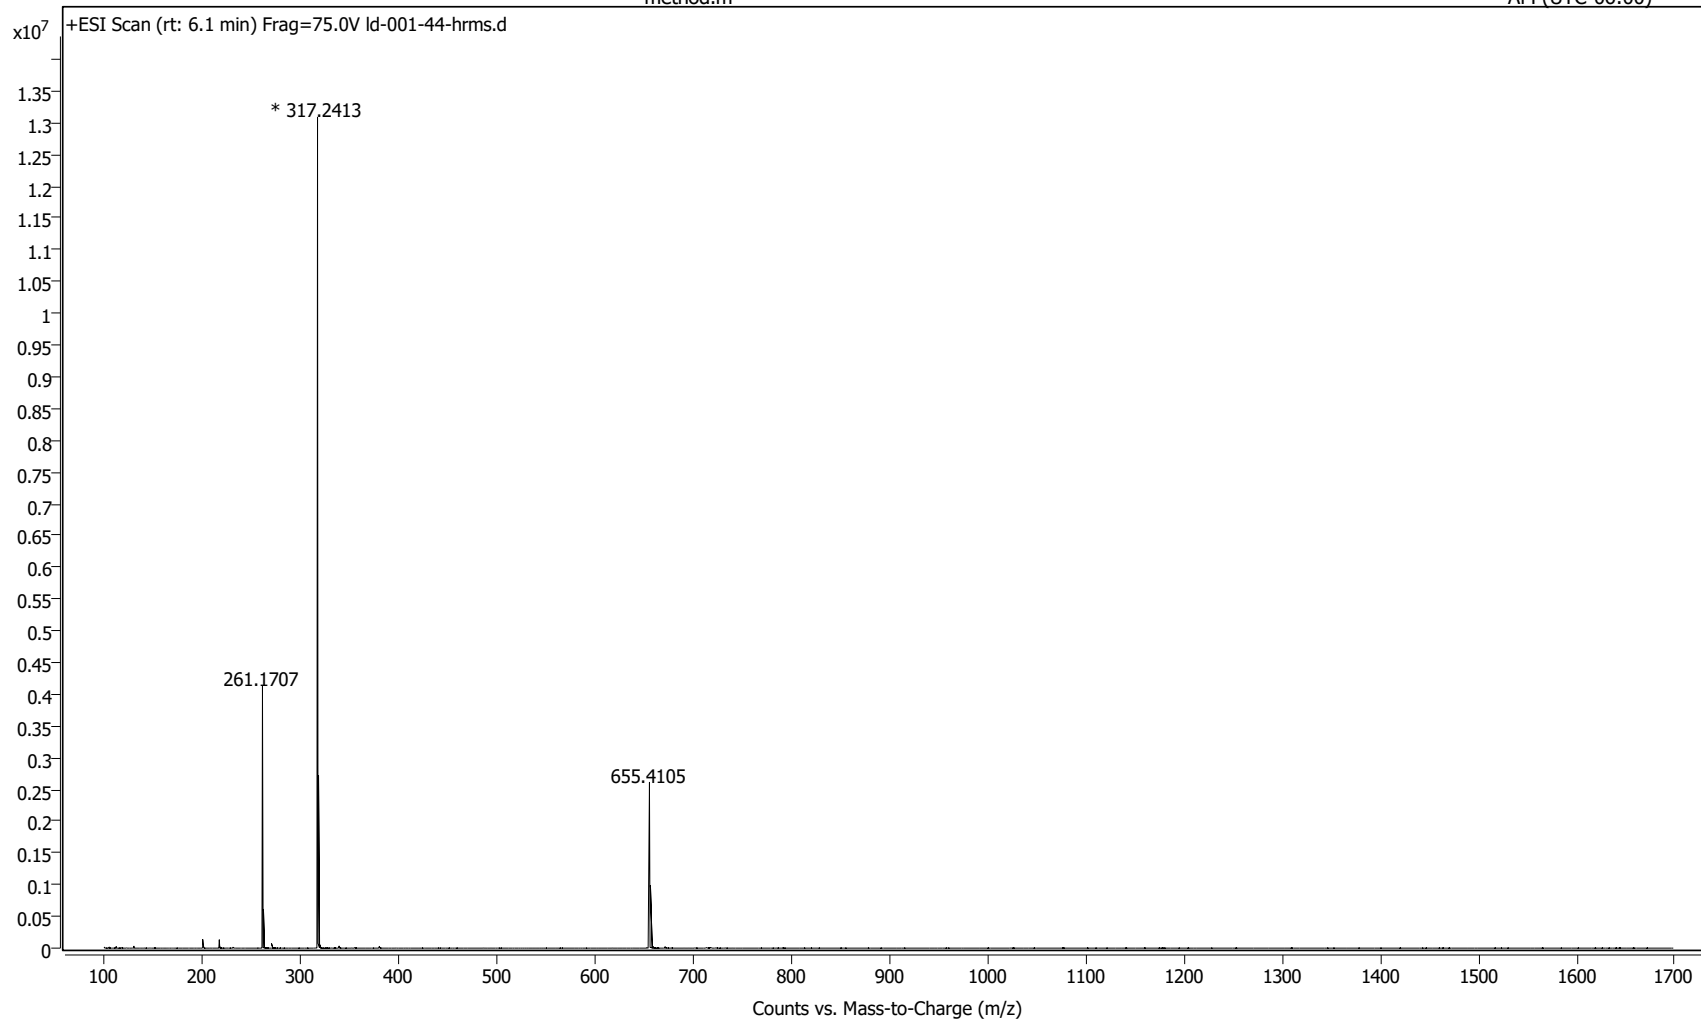

**SH-SY5Y Compound Treatment MTS Data**

| Triton X   | Control | 100        | 50         | 10         | 1          | 0.1        |
|------------|---------|------------|------------|------------|------------|------------|
| 24.8344371 | 100     | 38.1898455 | 48.6754967 | 87.196468  | 89.514349  | 99.2273732 |
| 26.8674699 | 100     | 37.5903615 | 40.6024097 | 92.4096386 | 89.6385543 | 122.409639 |
| 32.0359281 | 100     | 47.4550898 | 49.251497  | 94.760479  | 138.772455 | 141.916168 |
| 36.4906832 | 100     | 59.3167701 | 76.2422359 | 88.8198757 | 90.9937887 | 89.2857142 |
| 38.7791741 | 100     | 65.7091561 | 84.3806104 | 98.0251346 | 96.0502693 | 101.615799 |
| 36.2041465 | 100     | 59.0111641 | 73.2057413 | 84.5295052 | 108.61244  | 89.1547045 |
| 49.3827157 | 100     | 68.148145  | 86.1728454 | 86.9135845 | 93.3333374 | 96.5432139 |
| 49.4033214 | 100     | 70.4056995 | 85.4414895 | 88.3054537 | 95.4653495 | 99.7613008 |
| 48.2185167 | 100     | 73.3966611 | 83.1353787 | 91.9239732 | 104.038018 | 97.6246823 |
| 47.4025806 | 100     | 77.2726912 | 75.9739957 | 78.7878439 | 79.4371964 | 80.952349  |
| 43.5146368 | 100     | 75.9414072 | 77.6150464 | 84.3096031 | 90.3765519 | 90.1673402 |
| 56.0975575 | 100     | 97.0189682 | 99.4580007 |            | 134.6883   | 123.848195 |
| 43.9252311 | 100     | 68.9252311 | 80.1401868 | 86.2149558 | 90.6542085 | 100.467257 |
| 43.4883906 | 100     | 69.7674681 | 85.8139843 | 92.3256133 | 100.697674 | 105.348901 |
| 47.0588254 | 100     | 70.0980405 | 90.6862837 | 98.0392204 | 103.921539 | 105.882391 |
| 15.949961  | 100     | 57.0758407 | 82.2517594 | 88.2720879 | 98.2799069 | 99.3745115 |
| 15.7356413 | 100     | 75.6884345 | 84.3430371 | 90.9520065 | 95.8300552 | 101.966955 |
| 18.3742592 | 100     | 82.5571549 | 82.049111  | 95.0889078 | 103.979678 | 105.50381  |
| 15.472561  | 100     | 77.1341466 | 85.97561   | 88.795732  | 99.314025  | 101.067073 |
| 15.6893819 | 100     | 90.7290016 | 86.2916007 | 88.4310618 | 100.396197 | 103.565768 |
| 15.9220147 | 100     | 81.4784728 | 86.4337936 | 86.9212023 | 101.218522 | 103.005686 |



**SK-N-AS Compound Treatment MTS Data**

| Control | 100      | 50       | 10       | 1        | 0.1      |
|---------|----------|----------|----------|----------|----------|
| 100     | 104.9729 | 68.71609 | 92.72152 | 91.5009  | 103.3906 |
| 100     | 107.7249 | 82.61894 | 109.4677 | 97.55064 | 106.406  |
| 100     | 106.4533 | 86.12805 | 108.0793 | 105.3354 | 113.6179 |
| 100     | 93.47368 | 67.49474 | 93.93684 | 99.41053 | 92.92632 |
| 100     | 93.59248 | 74.11363 | 87.35583 | 103.5882 | 95.30115 |
| 100     | 93.97284 | 76.14601 | 100.0424 | 100.8065 | 98.89643 |
| 100     | 23.72731 | 76.40549 | 98.22931 | 100.1328 | 104.8694 |
| 100     | 87.4537  | 82.68519 | 95.13889 | 106.9444 | 108.8889 |
| 100     | 94.8512  | 81.5777  | 109.778  | 107.8413 | 107.4634 |

**SK-N-BE2 Compound Treatment MTS Data**

| Control | 100      | 50       | 10       | 1        | 0.1      |
|---------|----------|----------|----------|----------|----------|
| 100     | 16.41362 | 88.01805 | 115.3878 | 101.7645 | 96.0197  |
| 100     | 16.87949 | 86.31285 | 91.02155 | 82.16281 | 99.60096 |
| 100     | 18.4769  | 111.0695 | 112.3179 | 96.54598 | 107.1161 |
| 100     | 23.89381 | 123.4253 | 124.9349 | 118.3758 | 96.56429 |
| 100     | 18.33333 | 100.0427 | 103.2051 | 93.2906  | 82.05128 |
| 100     | 16.10605 | 63.03918 | 92.24377 | 77.40404 | 83.22121 |
| 100     | 18.17107 | 92.58967 | 87.30784 | 94.36342 | 96.64959 |
| 100     | 15.23283 | 91.35754 | 102.5257 | 97.71113 | 106.7088 |
| 100     | 16.37546 | 79.15482 | 96.58675 | 97.19626 | 101.7879 |

**SK-N-MC Compound Treatment MTS Data**

| Triton X   | Control | 100        | 50         | 10         | 1          | 0.1        |
|------------|---------|------------|------------|------------|------------|------------|
| 22.1965318 | 100     | 55.6069364 | 65.549133  | 113.641618 | 113.988439 | 105.780347 |
| 21.7391304 | 100     | 81.6933638 | 62.9290618 | 113.157895 | 111.670481 | 111.784897 |
| 20.0868621 | 100     | 80.0217155 | 58.8490771 | 101.520087 | 102.714441 | 98.6970684 |
| 22.1590909 | 100     |            |            |            |            |            |
| 21.3186813 | 100     | 81.4285714 | 63.0769231 | 110.989011 | 99.5604396 | 104.945055 |
| 21.5316315 | 100     | 81.5760266 | 65.0388457 | 112.319645 | 108.990011 | 106.770255 |
| 21.2606838 | 100     | 75.3205128 | 60.6837607 | 102.991453 | 102.67094  | 94.2307693 |
| 21.5285253 | 100     |            |            |            |            |            |
| 21.1991435 | 100     | 76.0171306 | 54.8179871 | 107.066381 | 104.925054 | 105.674518 |
| 21.168688  | 100     | 59.9779493 | 51.1576626 | 106.394708 | 105.953694 | 107.607497 |
| 23.5772358 | 100     | 59.1173055 | 61.9047619 | 109.407665 | 106.387921 | 114.866434 |
| 21.8681319 | 100     |            |            |            |            |            |

**CHLA255 Compound Treatment MTS Data**

| Triton X    | Control | 100         | 50          | 10          | 1           | 0.1         |
|-------------|---------|-------------|-------------|-------------|-------------|-------------|
| 28.37326608 | 100     | 38.72113677 | 88.72113677 | 103.6412078 | 100.7104796 | 102.3978686 |
| 27.30582524 | 100     | 44.85049834 | 85.46511628 | 100.166113  | 100         | 101.4950166 |
| 30.22959184 | 100     | 39.19382504 | 94.16809605 | 101.0291595 | 101.3722127 | 109.4339623 |
| 28.82653061 | 100     | 23.82495948 | 95.46191248 | 98.86547812 | 105.9967585 | 105.9967585 |
| 42.17335058 | 100     | 67.17557252 | 102.0038168 | 130.9160305 | 131.0114504 | 119.2748092 |
| 42.91091593 | 100     | 24.40622441 | 86.56838657 | 113.8411138 | 106.7977068 | 101.3104013 |
| 41.56479218 | 100     | 57.07112971 | 94.64435146 | 95.39748954 | 96.06694561 | 99.66527197 |
| 42.22222222 | 100     | 59.32642487 | 90.41450777 | 103.626943  | 109.8445596 | 104.1450777 |
| 24.52606635 | 100     | 61.78287732 | 91.43865843 | 102.3830538 | 100.4413063 | 102.5595763 |
| 24.94305239 |         |             |             |             |             |             |
| 25.98607889 |         |             |             |             |             |             |
| 26.37749121 |         |             |             |             |             |             |

**WPMY-1 Compound Treatment MTS Data**

| Triton X    | Control | 100      | 50       | 10       | 1        | 0.1      |
|-------------|---------|----------|----------|----------|----------|----------|
| 11.94105691 | 100     | 113.5256 | 107.0833 | 102.3077 | 99.77564 | 99.48718 |
| 12.37998989 | 100     | 119.8304 | 113.2746 | 100.848  | 103.8813 | 104.9902 |
| 13.21996709 | 100     | 97.23206 | 109.205  | 104.9887 | 103.3151 | 103.4117 |
| 12.70096463 | 100     | 105.6299 | 100.7304 | 98.3871  | 101.3086 | 99.87827 |
| 12.65155509 | 100     | 104.247  | 102.0783 | 101.3855 | 99.51807 | 98.34337 |
| 13.24903793 | 100     | 110.7688 | 102.9879 | 104.793  | 99.75101 | 102.8945 |
| 11.99029126 | 100     | 107.7163 | 102.1556 | 103.249  | 101.7182 | 98.75039 |
| 12.43347847 | 100     | 106.4118 | 106.2269 | 99.75339 | 99.32182 | 100.7707 |
| 12.47534517 | 100     | 104.5923 | 108.5286 | 103.9988 | 102.5305 | 100.3124 |
| 13.60394953 |         |          |          |          |          |          |
| 12.19251337 |         |          |          |          |          |          |
| 13.14223905 |         |          |          |          |          |          |

**PANC-1 Compound Treatment MTS Data**

| Triton X    | Control | 100        | 50         | 10         | 1          | 0.1        |
|-------------|---------|------------|------------|------------|------------|------------|
| 13.65330848 | 100     | 103.631291 | 100.039927 | 99.8403904 | 99.6408537 | 97.4860255 |
| 13.95       | 100     | 98.2121103 | 104.185245 | 104.063374 | 99.4311214 | 102.844363 |
| 13.80597015 | 100     | 102.842103 | 105.278146 | 102.923251 | 99.025583  | 102.760855 |
| 12.94067068 | 100     | 90.0245298 | 101.185609 | 102.943582 | 102.902699 | 101.635323 |
| 13.49775785 | 100     | 93.9569537 | 103.311259 | 103.228476 | 103.352649 | 99.2963572 |
| 13.2033673  | 100     | 95.6896552 | 105.991379 | 106.551724 | 100.560345 | 103.49138  |
|             | 100     | 95.0925927 | 102.314815 | 105.925926 | 106.990741 | 104.398148 |
|             | 100     | 97.0479705 | 101.52214  | 104.98155  | 106.319189 | 103.597786 |
|             | 100     | 98.2175505 | 104.570384 | 103.976234 | 104.021938 | 102.74223  |
|             | 100     | 96.7313585 | 63.7895812 | 105.87334  | 106.690501 | 98.1103167 |
|             | 100     | 89.0489914 | 101.536984 | 100.576369 | 106.48415  | 103.650336 |
|             | 100     | 97.9477611 | 79.5708955 | 98.8339552 | 105.363806 | 103.311567 |
|             | 100     | 71.1840888 | 89.0841813 | 89.0379278 | 79.093432  | 73.4967622 |
|             | 100     | 77.4464119 | 87.4184529 | 87.0456663 | 83.1314072 | 78.4249767 |
|             | 100     | 82.3212537 | 96.2291871 | 100.244858 | 89.8628795 | 83.1047992 |
|             | 100     | 79.3298969 | 99.2783505 | 99.2268041 | 88.1443299 | 81.9072165 |
|             | 100     | 88.4984026 | 99.8935037 | 99.4675186 | 94.9946752 | 89.6166134 |
|             | 100     | 88.2878151 | 103.203782 | 107.510504 | 96.3760504 | 89.1281513 |

**LNCaP Compound Treatment MTS Data**

| Enzalutamide<br>25 $\mu$ M | Control | 100        | 50         | 10         | 1          | 0.1        |
|----------------------------|---------|------------|------------|------------|------------|------------|
| 88.17204301                | 100     | 88.8242895 | 92.7648579 | 110.07752  | 106.007752 | 102.196382 |
| 92.16446858                | 100     |            | 100.571792 | 89.9618809 | 106.797967 | 98.5387557 |
| 93.26552087                | 100     | 89.9280576 | 95.4872466 | 93.852191  | 103.400915 | 98.2995422 |
| 76.46566164                | 100     | 93.0015552 | 98.289269  | 104.043545 | 105.365474 | 100.311042 |
| 66.44250168                | 100     | 90.2019446 | 100.448766 | 103.066567 | 101.869858 | 102.543007 |
| 78.54602924                | 100     | 87.473002  | 97.336213  | 94.1684664 | 95.4643627 | 97.5521957 |
| 78.21442198                | 100     | 84.5833334 | 91         | 81.9166667 | 80.5       | 77.5416667 |
| 84.61869884                | 100     | 91.6981132 | 103.915094 | 97.4528302 | 104.716981 | 89.8584906 |
| 77.42812743                | 100     | 111.381733 | 101.358314 | 102.201405 | 104.824356 | 93.0210773 |
| 83.77265239                |         |            |            |            |            |            |
| 76.64084794                |         |            |            |            |            |            |
| 91.76470588                |         |            |            |            |            |            |

**PnT2C2 Compound Treatment MTS Data**

| Triton X    | Control | 100         | 50          | 10          | 1           | 0.1         |
|-------------|---------|-------------|-------------|-------------|-------------|-------------|
| 18.53593015 | 100     | 60.48728814 | 95.33898305 | 93.75       | 106.0381356 | 95.76271186 |
| 18.21862348 | 100     |             | 107.6309795 | 113.667426  | 114.1230068 | 105.4669704 |
| 17.98611111 | 100     | 65.62162162 | 107.7837838 | 102.4864865 | 110.5945946 | 103.6756757 |
| 18.77125368 | 100     | 69.70387244 | 102.0501139 | 102.3917995 | 101.7084282 | 97.72209567 |
| 18.36318295 | 100     | 68.31896552 | 99.24568966 | 106.4655172 | 103.0172414 | 95.36637931 |
| 17.61505328 | 100     | 70.80890973 | 101.1723329 | 109.2614302 | 101.2895662 | 91.44196952 |
|             | 100     | 74.77876106 | 109.8451327 | 103.9823009 | 97.12389381 | 94.80088496 |
|             | 100     | 76.55502392 | 107.4162679 | 121.1722488 | 110.8851675 | 103.708134  |
|             | 100     | 72.52252252 | 114.6396396 | 112.3873874 | 97.52252252 | 102.5900901 |



**HPNE Compound Treatment MTS Data**

| Triton X    | Control | 100         | 50          | 10          | 1           | 0.1         |
|-------------|---------|-------------|-------------|-------------|-------------|-------------|
| 29.54784437 | 100     | 90.09287926 | 106.3983488 | 103.3023736 | 105.5727554 | 103.5087719 |
| 29.00735294 | 100     | 87.74193548 | 113.9784946 | 108.3870968 | 105.0537634 | 104.4086022 |
| 35.93220339 | 100     | 91.57303371 | 110.2247191 | 107.5280899 | 102.4719101 | 96.96629213 |
| 30.54298643 | 100     | 100.1077586 | 117.9956897 | 121.4439655 | 118.2112069 | 110.1293103 |
| 21.74672489 | 100     | 87.38916256 | 107.8817734 | 105.1231527 | 99.01477833 | 102.364532  |
| 21.01859337 | 100     | 92.6803014  | 110.9795479 | 114.9623251 | 107.9655544 | 108.073197  |
| 25.2553389  | 100     | 85.65697091 | 100.2006018 | 106.0180542 | 99.59879639 | 99.79939819 |
| 24.85549133 | 100     | 97.22222222 | 106.2757202 | 111.4197531 | 103.7037037 | 104.9382716 |
| 15.2953054  | 100     | 85.02512563 | 104.9246231 | 105.7286432 | 96.68341709 | 97.78894472 |
| 15.922539   |         |             |             |             |             |             |
| 29.9196787  |         |             |             |             |             |             |
| 27.6397516  |         |             |             |             |             |             |

**SH-SY5Y Cells Cotreatment of Compound 1 A $\beta$  MTS Data**

| Triton     | Control | A $\beta$  | 100        | 50         | 10         | 1          | 0.1        |
|------------|---------|------------|------------|------------|------------|------------|------------|
| 15.6626549 | 100     | 82.6944418 | 55.6407634 | 72.6177725 | 75.794112  | 79.29904   | 79.1895138 |
| 15.9142255 | 100     | 82.8442412 | 47.0654626 | 76.7494284 | 78.1038358 | 86.2302495 | 82.2799116 |
| 16.8982825 | 100     | 79.822132  | 49.3607674 | 74.3746612 | 77.0428116 | 85.3807828 | 83.2684925 |

**SH-SY5Y Cells Pretreatment of Compound 1 A $\beta$  MTS Data**

| Triton     | Control | A $\beta$ (50 $\mu$ M) | 100        | 50         | 10         | 1          | 0.1        |
|------------|---------|------------------------|------------|------------|------------|------------|------------|
| 19.7628458 | 100     | 94.4664031             | 24.1106719 | 56.027668  | 79.6442687 | 93.0830039 | 93.8735178 |
| 19.94077   | 100     | 89.1411648             | 26.0612043 | 57.1569595 | 70.9772952 | 90.4244817 | 96.3474827 |
| 20.0604839 | 100     | 90.7258065             | 26.3104839 | 55.6451613 | 78.3266129 | 90.4233871 | 92.5403226 |
|            | 100     | 85.3911405             |            |            |            |            |            |
|            | 100     | 95.4864594             |            |            |            |            |            |
|            | 100     | 89.2787524             |            |            |            |            |            |
|            | 100     | 82.6086957             |            |            |            |            |            |
|            | 100     | 81.7796611             |            |            |            |            |            |
|            | 100     | 78.9699571             |            |            |            |            |            |
|            | 100     | 83.0832196             |            |            |            |            |            |
|            | 100     | 75.4789272             |            |            |            |            |            |
|            | 100     | 92.4437299             |            |            |            |            |            |
|            | 100     | 79.9311927             |            |            |            |            |            |
|            | 100     | 88.7978142             |            |            |            |            |            |
|            | 100     | 79.3710692             |            |            |            |            |            |
|            | 100     | 60.0585938             |            |            |            |            |            |
|            | 100     | 65.2173913             |            |            |            |            |            |
|            | 100     | 61.6533865             |            |            |            |            |            |
|            | 100     | 90.8756748             |            |            |            |            |            |
|            | 100     | 88.0025911             |            |            |            |            |            |
|            | 100     | 94.4332661             |            |            |            |            |            |

|  |     |            |  |  |  |  |  |
|--|-----|------------|--|--|--|--|--|
|  | 100 | 89.1218876 |  |  |  |  |  |
|  | 100 | 94.3396226 |  |  |  |  |  |
|  | 100 | 79.6730632 |  |  |  |  |  |
|  | 100 | 81.7912659 |  |  |  |  |  |
|  | 100 | 80.1101171 |  |  |  |  |  |
|  | 100 | 82.0138889 |  |  |  |  |  |
|  | 100 | 80.8374734 |  |  |  |  |  |
|  | 100 | 82.7191868 |  |  |  |  |  |
|  | 100 | 83.6294414 |  |  |  |  |  |
|  | 100 | 83.1432189 |  |  |  |  |  |
|  | 100 | 82.7191867 |  |  |  |  |  |
|  | 100 | 83.6294417 |  |  |  |  |  |
|  | 100 | 83.1432193 |  |  |  |  |  |
|  | 100 | 90.8756748 |  |  |  |  |  |
|  | 100 | 88.0025911 |  |  |  |  |  |
|  | 100 | 89.1218876 |  |  |  |  |  |
|  | 100 | 94.4332661 |  |  |  |  |  |

**SH-SY5Y Cells Pretreatment of Compound 14b A $\beta$  MTS Data**

| Control | A $\beta$  | 100        | 50         | 10         | 1          | 0.1        |
|---------|------------|------------|------------|------------|------------|------------|
| 100     | 94.4664031 |            |            |            |            |            |
| 100     | 89.1411648 |            |            |            |            |            |
| 100     | 90.7258065 |            |            |            |            |            |
| 100     | 85.3911405 |            |            |            |            |            |
| 100     | 95.4864594 |            |            |            |            |            |
| 100     | 89.2787524 |            |            |            |            |            |
| 100     | 82.6086957 |            |            |            |            |            |
| 100     | 81.7796611 |            |            |            |            |            |
| 100     | 78.9699571 |            |            |            |            |            |
| 100     | 83.0832196 | 79.3997271 | 83.9017735 | 78.5811732 | 81.3096862 | 84.5839017 |
| 100     | 75.4789272 | 69.348659  | 79.6934866 | 79.6934866 | 82.247765  | 87.4840358 |
| 100     | 92.4437299 | 77.6527331 | 93.2475884 | 100.803859 | 103.054662 | 109.163987 |
| 100     | 79.9311927 |            |            |            |            |            |
| 100     | 88.7978142 |            |            |            |            |            |
| 100     | 79.3710692 |            |            |            |            |            |
| 100     | 60.0585938 |            |            |            |            |            |
| 100     | 65.2173913 |            |            |            |            |            |
| 100     | 61.6533865 |            |            |            |            |            |
| 100     | 90.8756748 |            |            |            |            |            |
| 100     | 88.0025911 |            |            |            |            |            |
| 100     | 94.4332661 |            |            |            |            |            |

|     |            |            |            |            |            |            |
|-----|------------|------------|------------|------------|------------|------------|
| 100 | 89.1218876 |            |            |            |            |            |
| 100 | 94.3396226 |            |            |            |            |            |
| 100 | 79.6730632 |            |            |            |            |            |
| 100 | 81.7912659 |            |            |            |            |            |
| 100 | 80.1101171 |            |            |            |            |            |
| 100 | 82.0138889 |            |            |            |            |            |
| 100 | 80.8374734 |            |            |            |            |            |
| 100 | 82.7191868 |            |            |            |            |            |
| 100 | 83.6294414 |            |            |            |            |            |
| 100 | 83.1432189 |            |            |            |            |            |
| 100 | 82.7191867 |            |            |            |            |            |
| 100 | 83.6294417 |            |            |            |            |            |
| 100 | 83.1432193 |            |            |            |            |            |
| 100 | 90.8756748 | 88.4262001 | 80.4041539 | 96.9993424 | 100.91851  | 97.3668426 |
| 100 | 88.0025911 | 89.6887118 | 91.8287867 | 101.297014 | 106.485062 | 109.07907  |
| 100 | 89.1218876 | 83.7403585 | 85.4113086 | 90.8740386 | 90.2313663 | 91.2596441 |
| 100 | 94.4332661 |            |            |            |            |            |

**SH-SY5Y Cells Pretreatment of Compound 14c A $\beta$  MTS Data**

| Control | A $\beta$  | 100        | 50         | 10         | 1          | 0.1        |
|---------|------------|------------|------------|------------|------------|------------|
| 100     | 94.4664031 |            |            |            |            |            |
| 100     | 89.1411648 |            |            |            |            |            |
| 100     | 90.7258065 |            |            |            |            |            |
| 100     | 85.3911405 |            |            |            |            |            |
| 100     | 95.4864594 |            |            |            |            |            |
| 100     | 89.2787524 |            |            |            |            |            |
| 100     | 82.6086957 |            |            |            |            |            |
| 100     | 81.7796611 |            |            |            |            |            |
| 100     | 78.9699571 |            |            |            |            |            |
| 100     | 83.0832196 | 73.260573  | 67.8035471 | 79.9454297 | 84.856753  | 88.8130968 |
| 100     | 75.4789272 | 52.4904214 | 70.881226  | 76.8837803 | 79.8212005 | 85.3128991 |
| 100     | 92.4437299 | 83.9228296 | 83.6012862 | 95.3376206 | 95.3376206 | 106.109325 |
| 100     | 79.9311927 |            |            |            |            |            |
| 100     | 88.7978142 |            |            |            |            |            |
| 100     | 79.3710692 |            |            |            |            |            |
| 100     | 60.0585938 |            |            |            |            |            |
| 100     | 65.2173913 |            |            |            |            |            |
| 100     | 61.6533865 |            |            |            |            |            |
| 100     | 90.8756748 |            |            |            |            |            |
| 100     | 88.0025911 |            |            |            |            |            |
| 100     | 94.4332661 |            |            |            |            |            |

|     |            |            |            |            |            |            |
|-----|------------|------------|------------|------------|------------|------------|
| 100 | 89.1218876 |            |            |            |            |            |
| 100 | 94.3396226 |            |            |            |            |            |
| 100 | 79.6730632 |            |            |            |            |            |
| 100 | 81.7912659 |            |            |            |            |            |
| 100 | 80.1101171 |            |            |            |            |            |
| 100 | 82.0138889 |            |            |            |            |            |
| 100 | 80.8374734 |            |            |            |            |            |
| 100 | 82.7191868 |            |            |            |            |            |
| 100 | 83.6294414 |            |            |            |            |            |
| 100 | 83.1432189 |            |            |            |            |            |
| 100 | 82.7191867 |            |            |            |            |            |
| 100 | 83.6294417 |            |            |            |            |            |
| 100 | 83.1432193 |            |            |            |            |            |
| 100 | 90.8756748 | 76.9748873 | 89.5897034 |            |            |            |
| 100 | 88.0025911 | 82.8793708 | 88.2619919 | 88.4565451 | 100.129695 | 96.4980529 |
| 100 | 89.1218876 | 66.6452419 | 95.8868889 | 97.0437052 | 93.5732665 | 96.1439559 |
| 100 | 94.4332661 |            |            |            |            |            |



**SH-SY5Y Cells Pretreatment of Compound 14d A $\beta$  MTS Data**

| Control | A $\beta$  | 100        | 50         | 10         | 1          | 0.1        |
|---------|------------|------------|------------|------------|------------|------------|
| 100     | 94.4664031 |            |            |            |            |            |
| 100     | 89.1411648 |            |            |            |            |            |
| 100     | 90.7258065 |            |            |            |            |            |
| 100     | 85.3911405 |            |            |            |            |            |
| 100     | 95.4864594 |            |            |            |            |            |
| 100     | 89.2787524 |            |            |            |            |            |
| 100     | 82.6086957 |            |            |            |            |            |
| 100     | 81.7796611 |            |            |            |            |            |
| 100     | 78.9699571 |            |            |            |            |            |
| 100     | 83.0832196 |            |            |            |            |            |
| 100     | 75.4789272 |            |            |            |            |            |
| 100     | 92.4437299 |            |            |            |            |            |
| 100     | 79.9311927 | 53.2110092 | 75.5733945 | 76.0321101 | 83.9449541 | 78.5550459 |
| 100     | 88.7978142 | 51.0928962 | 86.2021858 | 91.3934426 | 92.3497268 | 93.715847  |
| 100     | 79.3710692 | 50.4402516 | 77.4842767 | 83.7735849 | 84.654088  | 82.2641509 |
| 100     | 60.0585938 |            |            |            |            |            |
| 100     | 65.2173913 |            |            |            |            |            |
| 100     | 61.6533865 |            |            |            |            |            |
| 100     | 90.8756748 |            |            |            |            |            |
| 100     | 88.0025911 |            |            |            |            |            |
| 100     | 94.4332661 |            |            |            |            |            |

|     |            |            |            |            |            |            |
|-----|------------|------------|------------|------------|------------|------------|
| 100 | 89.1218876 |            |            |            |            |            |
| 100 | 94.3396226 |            |            |            |            |            |
| 100 | 79.6730632 |            |            |            |            |            |
| 100 | 81.7912659 |            |            |            |            |            |
| 100 | 80.1101171 |            |            |            |            |            |
| 100 | 82.0138889 |            |            |            |            |            |
| 100 | 80.8374734 |            |            |            |            |            |
| 100 | 82.7191868 |            |            |            |            |            |
| 100 | 83.6294414 |            |            |            |            |            |
| 100 | 83.1432189 |            |            |            |            |            |
| 100 | 82.7191867 |            |            |            |            |            |
| 100 | 83.6294417 |            |            |            |            |            |
| 100 | 83.1432193 |            |            |            |            |            |
| 100 | 90.8756748 |            |            |            |            |            |
| 100 | 88.0025911 | 104.245974 | 97.1449488 | 110.322109 | 113.250366 |            |
| 100 | 89.1218876 | 86.8283097 | 91.0222808 | 108.256881 | 91.1533425 | 107.470512 |
| 100 | 94.4332661 | 96.042924  | 82.830315  | 82.3608315 | 86.3849764 | 92.8236081 |

**SH-SY5Y Cells Pretreatment of Compound 14e A $\beta$  MTS Data**

| Control | A $\beta$  | 100        | 50         | 10         | 1          | 0.1        |
|---------|------------|------------|------------|------------|------------|------------|
| 100     | 94.4664031 |            |            |            |            |            |
| 100     | 89.1411648 |            |            |            |            |            |
| 100     | 90.7258065 |            |            |            |            |            |
| 100     | 85.3911405 |            |            |            |            |            |
| 100     | 95.4864594 |            |            |            |            |            |
| 100     | 89.2787524 |            |            |            |            |            |
| 100     | 82.6086957 |            |            |            |            |            |
| 100     | 81.7796611 |            |            |            |            |            |
| 100     | 78.9699571 |            |            |            |            |            |
| 100     | 83.0832196 |            |            |            |            |            |
| 100     | 75.4789272 |            |            |            |            |            |
| 100     | 92.4437299 |            |            |            |            |            |
| 100     | 79.9311927 | 86.6972477 | 82.5688073 | 77.4082569 | 84.4036697 | 83.2568807 |
| 100     | 88.7978142 | 88.6612022 | 101.775956 | 92.3497268 | 94.8087432 | 96.7213115 |
| 100     | 79.3710692 | 85.5345912 | 86.4150943 | 85.0314465 | 90.1886792 | 91.9496855 |
| 100     | 60.0585938 |            |            |            |            |            |
| 100     | 65.2173913 |            |            |            |            |            |
| 100     | 61.6533865 |            |            |            |            |            |
| 100     | 90.8756748 |            |            |            |            |            |
| 100     | 88.0025911 |            |            |            |            |            |
| 100     | 94.4332661 |            |            |            |            |            |

|     |            |            |            |            |            |            |
|-----|------------|------------|------------|------------|------------|------------|
| 100 | 89.1218876 |            |            |            |            |            |
| 100 | 94.3396226 |            |            |            |            |            |
| 100 | 79.6730632 |            |            |            |            |            |
| 100 | 81.7912659 |            |            |            |            |            |
| 100 | 80.1101171 |            |            |            |            |            |
| 100 | 82.0138889 |            |            |            |            |            |
| 100 | 80.8374734 |            |            |            |            |            |
| 100 | 82.7191868 |            |            |            |            |            |
| 100 | 83.6294414 |            |            |            |            |            |
| 100 | 83.1432189 |            |            |            |            |            |
| 100 | 82.7191867 |            |            |            |            |            |
| 100 | 83.6294417 |            |            |            |            |            |
| 100 | 83.1432193 |            |            |            |            |            |
| 100 | 90.8756748 |            |            |            |            |            |
| 100 | 88.0025911 | 95.6076135 | 99.9267936 | 103.147877 | 93.7042459 |            |
| 100 | 89.1218876 | 92.1363044 | 80.0131065 | 79.9475756 | 83.5517696 | 88.3355181 |
| 100 | 94.4332661 | 84.7753184 | 85.4460092 | 93.4942989 | 88.9336014 | 100.469483 |
